# Supplementary material
Source: Research Square preprint supplement (doi:10.21203/rs.3.rs-10009400/v1)
Supplement: Supplementary file 1 [file 6176aa408f5545e54c4058e8.docx]

**Supplementary Information**

for

**Hidden Mononuclear Catalysis within Dirhodium(II)/Phosphine Systems: Mechanism, Active Species, and Stereoselectivity**

Sapna Rawat,[a] Debopam Sarkar, [b] Priyotosh Das,[a] Abhishake Mondal,[b] and Garima Jindal*[a]

[a]Department of Organic Chemistry, Chemical Sciences Building, Indian Institute of Science, Bengaluru, Karnataka-560012, India

[b]Solid State and Structural Chemistry Unit, Chemical Sciences Building, Indian Institute of Science, Bengaluru, Karnataka-560012, India

email: gjindal@iisc.ac.in

**Contents**

***Experimental Studies***

1. General Information S3

2. Synthesis and Characterization of Active Species (**X1**) S3

3. 31P{1H} VT-NMR experiments S7

3.1 31P{1H} VT-NMR with Dirhodium(II) and Josiphos S7

3.2. 31P{1H) VT-NMR with Phenylboronic Acid S8

3.3. 31P{1H} VT-NMR with [Rh(C2H4)2Cl]2, Josiphos and Phenylboronic Acid S9

4. Control experiments with [Rh(C2H4)2Cl]2 and Josiphos S10

5. Investigation of the Chloride Source in **X1** S11

5.1. Identification of Chloride source in BLD Pharma Dirhodium(II) S11

5.2. Detection of Transmetalated Complex (**X2**) with TCI Dirhodium (II) S12

5.3. Experiments to Detect the Active Species Forming with TCI Dirhodium(II) S13

6. Role of Additives in Dissociation of Rh-Rh bonds S14

7. Detection and Characterization of Transmetalated Complex (**X2**) S18

8. Synthesis of Compound **1a** S19

9. Catalytic activity of **X1** S20

10. ESI-HRMS data of **X1** and **X2** S27

11. Prior reported Dirhodium/phosphine complexes with their 31P chemical shift S28

12. X-ray Crystallography data of **X1**  S30

**Computation Section**

13. Computational details S32

14. Probable Catalytic Dirhodium(II) Active Species S32

15. Additional DFT calculations S33

16. Conformational Sampling for TSs corresponding to Enantioselective Step S35

17. Activation Strain Analysis S36

18. Benchmark Studies of the Lowest Energy Pathway S37

19. Electronic Energies of all the Stationary Points S39

20. References S41

21. Cartesian Coordinates of all Optimized Geometries S43

1. **General Information**

All reactions were carried out with distilled and dried solvent under an inert nitrogen and argon atmosphere. All the reagents were purchased at the highest commercial quality and used without further purification. (*R*)-1-[(*Sp*)-2-(Di-1-naphthylphosphino)ferrocenyl]ethyldi-3,5-xylylphosphine (Josiphos ligand) and 9,10-phenthraquinoline were purchased from BLD pharma. Dirhodium(II) tetracarboxylate were purchased from different supplier (BLD pharma, TCI and Sigma Aldrich). BLD dirhodium(II) was used throughout all experiments in this study. Whenever dirhodium(II) from other commercially available sources was used, it is explicitly indicated. Phenylboronic acid and K2CO3 were acquired from Sigma Aldrich. Distilled water was used in reactions, where required. 4,5-dimethylphenanthrene-9,10-dione was synthesized by following the literature procedure. Progress of reactions were monitored by thin-layer chromatography (TLC) carried out on Merck silica gel 60 F254 precoated plates (0.25 mm) and visualized with UV light (254 nm) or KMnO4 staining solutions followed by heating. Yields were reported after purification via column chromatography using silica gel (100-200 mesh). Organic solvents used for carrying out reactions were dried using standard methods. All work up and purification were carried out with reagent grade solvents in air.

All 1H, 13C, and 31P-NMR spectra were recorded on a Bruker Ultrashield spectrometer at 400 MHz and calibrated using residual deuterated solvents as an internal reference (CDCl3: 1H NMR = 7.26 ppm, 13C NMR = 77.16 ppm; Toluene-d8: 1H NMR = 2.09 ppm). 35Cl NMR was recorded on Bruker Ultrashield spectrometer at 600 MHz in CD3CN solvent. The following abbreviations were used to explain NMR peak multiplicities: s = singlet, d = doublet, t = triplet, dd = doublet of doublet, br = broad).  All 31P{1H} VT-NMR and controlled experiment monitored in undeuterated toluene without locking and shimming. All spectra were processed with MestReNova x64 software package. Electrospray ionization high resolution mass spectrometry (ESI-HRMS) was performed on a Waters XEVO G3 Q-tof instrument in acetonitrile solvent. Optical rotations were measured on JASCO P-2000 polarimeter at 25 °C using 50 mm cell of 1.0 mL capacity. HPLC analysis was performed on either Agilent Technologies 1260 Infinity with a VWD or Agilent Technologies 1260 Infinity with a DAD.

1. **Synthesis and Characterization of Active Species X1**

An oven-dried 25 mL Schlenk tube equipped with a magnetic stir bar was charged with TCI Rh₂(OAc)₄ (97.2 mg, 0.22 mmol, 1.0 equiv), Josiphos ligand (162.5 mg, 0.22 mmol, 1.0 equiv) and KCl (32.80 mg, 0.44 mmol, 2.0 equiv) under a nitrogen atmosphere. Anhydrous toluene (7.4 mL) and acetic acid (1.8 mL) were then added under inert conditions. The resulting reaction mixture was stirred and heated at 80 °C for 3.5 h. Single crystals suitable for X-ray diffraction revealed that **X1** crystallizes as a 1:1 with toluene solvent.

**1H NMR** (400 MHz, CDCl3): δ 8.85 (d, *J* = 8.5 Hz, 1H), 8.44 (dd, *J* = 10.1, 7.0 Hz, 1H), 8.04 (dt, *J* = 13.4, 7.1 Hz, 3H), 7.93 (d, *J* = 8.1 Hz, 1H), 7.86 – 7.77 (m, 1H), 7.67 (t, *J* = 7.4 Hz, 1H), 7.58 (t, *J* = 7.4 Hz, 1H), 7.53 – 7.39 (m, 2H), 7.26 (s, 1H), 7.20 (d, *J* = 7.6 Hz, 4H), 7.11 (s, 2H), 6.93 (d, *J* = 10.5 Hz, 2H), 6.83 (t, *J* = 7.7 Hz, 1H), 6.62 (d, *J* = 7.4 Hz, 1H), 6.44 (s, 2H), 4.13 (s, 1H), 4.09 (s, 5H), 3.90 (d, *J* = 10.9 Hz, 1H), 3.80 (s, 1H), 2.51 – 2.43 (m, 1H), 2.38 (s, 3H), 2.33 (s, 6H), 2.28 (s, 6H), 1.66 (s, 3H), 1.02 (dd, *J* = 13.0, 6.8 Hz, 3H).

**31P{1H} NMR** (162 MHz, CDCl3): δ 68.49 (dd, *J* = 136.1, 25.4 Hz), 61.41 (dd, *J* = 131.6, 25.1 Hz).

**35Cl** (59 MHz, CD3CN) δ 34.77.

**
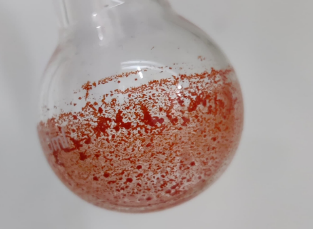
**

**Complex X1**

**Scheme S1.** Synthesis of X1 complex

**Purification: -**

After completion of the reaction, the mixture was allowed to cool to room temperature and filtered to remove unreacted Rh₂(OAc)₄. The filtrate was concentrated under reduced pressure after to afford a crude solid. This solid was dissolved in a minimal amount of DCM, followed by slow addition of hexane until a reddish-brown precipitate formed. The resulting suspension was filtered, and the orange-colored filtrate was concentrated to yield an orange solid (16 %). Crystallization of this material by vapor diffusion of *n*-pentane into a toluene solution afforded red crystals of **X1**. The **³¹P{¹H} NMR** spectra of the reddish-brown and orange solids are shown below. The **³¹P{¹H}**, **¹H**, and **³⁵Cl-NMR** spectra of **X1** are also provided below.

**31P{1H} NMR** (162 MHz, Toluene) δ 97.40 (dd, *J* = 148.4, 21.9 Hz), 85.83 – 79.63 (m), 67.44 (dd, *J* = 134.0, 23.5 Hz), 61.01 (dd, *J* = 132.3, 24.3 Hz), 44.68 (dd, *J* = 77.7, 21.5 Hz).

**Figure S1.** 31P{1H} NMR of orange colored solid

**31P{1H} NMR (162 MHz, Toluene)** δ 67.62 (dd, *J* = 133.8, 24.9 Hz), 61.19 (dd, *J* = 132.1, 24.7 Hz), 54.12 (dd, *J* = 232.4, 140.9 Hz), 51.41 (dt, *J* = 140.9, 40.2 Hz), 26.99 (dt, *J* = 130.6, 40.2 Hz), 23.65 (dd, *J* = 232.4, 130.0 Hz).

**Figure S2.** 31P{1H} NMR of reddish brown colored solid

**1H NMR** (400 MHz, CDCl3)

**Figure S3.** 1H NMRof **X1**

**31P{1H} NMR (162 MHz, Toluene)**

**Figure S4.** 31P{1H} NMR of **X1**

**35Cl NMR** (59 MHz, CD3CN)

**Figure S5.** 35Cl NMR of **X1**

1. **31P{1H} VT-NMR experiments**

**3.1. 31P{1H} VT-NMR with Dirhodium(II) and Josiphos**

Rh₂(OAc)₄ (11.0 mg, 0.025 mmol, 1.0 equiv) and the Josiphos ligand (37.0 mg, 0.05 mmol, 2.0 equiv) were charged into an oven-dried 2.5 mL vial under a nitrogen atmosphere, followed by the addition of 0.75 mL of toluene. The resulting mixture was stirred for 10 minutes at room temperature and then transferred to an oven-dried NMR tube for ³¹P{¹H} VT-NMR measurements over a temperature range from room temperature to 80 °C. At 40 °C, the spectrum was dominated by intense signals corresponding to the free Josiphos ligand, with the P1 and P2 nuclei resonating at 6.1 ppm and –50.3 ppm, respectively. After 2.5 h at 60 °C, two new intense signals appeared at 62.8 ppm (doublet), together with a signal at -41.6 ppm (singlet), highlighted by circles.

Based on the axial-equatorial coordination trends of phosphine ligands discussed above, these resonances may correspond to a species in which the P1 nucleus is equatorially coordinated to Rh, while the P2 nucleus remains uncoordinated, as indicated by its proximity to the chemical shift of free P2. Several pairs of dd signals (highlighted in the same color) shared a common second coupling constant, consistent with a P–Rh–P arrangement in which two chemically inequivalent phosphorus nuclei are coupled via the same Rh atom. Peaks corresponding to the **X1** complex appeared at 80 °C and were highlighted in blue.


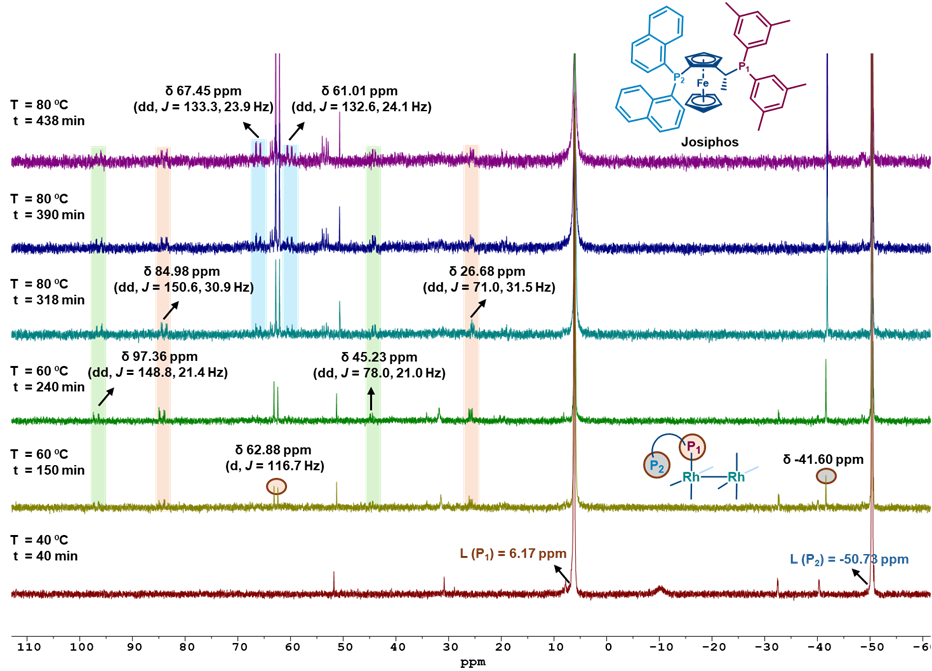


**Figure S6**. 31P{1H} VT-NMR with dirhodium(II)/Josiphos

- 1. **31P{1H) VT-NMR with Phenylboronic Acid**

Rh2(OAc)4 (11.0 mg, 0.025 mmol, 1.0 equiv), Josiphos (37.0 mg, 0.05 mmol, 2.0 equiv), PhB(OH)2 (30.5 mg, 0.25 mmol, 10.0 equiv), and K2CO3 (13.8 mg, 0.10 mmol, 4.0 equiv) were charged into an oven-dried 2.5 mL vial under a nitrogen atmosphere, followed by the addition of 0.75 mL toluene and 75.0 μL of distilled H2O. The resulting mixture was stirred for 10 minutes at room temperature and then transferred to an oven-dried NMR tube for 31P{1H} VT-NMR measurements over a temperature range from room temperature to 80 °C. The spectra displayed the peaks corresponding to transmetalated complex, **X2** after 1.5 h at 60 °C.

**31P{1H} NMR** (162 MHz, Toluene)

δ 85.05 (dd, *J* = 150.6, 31.7 Hz), 65.25 (dd, *J* = 154.7, 20.7 Hz), 54.17 (dd, *J* = 233.1, 141.7 Hz), 44.82 (dd, *J* = 73.1, 19.6 Hz), 26.90 (dd, *J* = 70.9, 32.2 Hz), 23.99 (dd, *J* = 233.0, 131.4 Hz), δ 97.60 (dd, *J* = 148.8, 21.8 Hz).

**
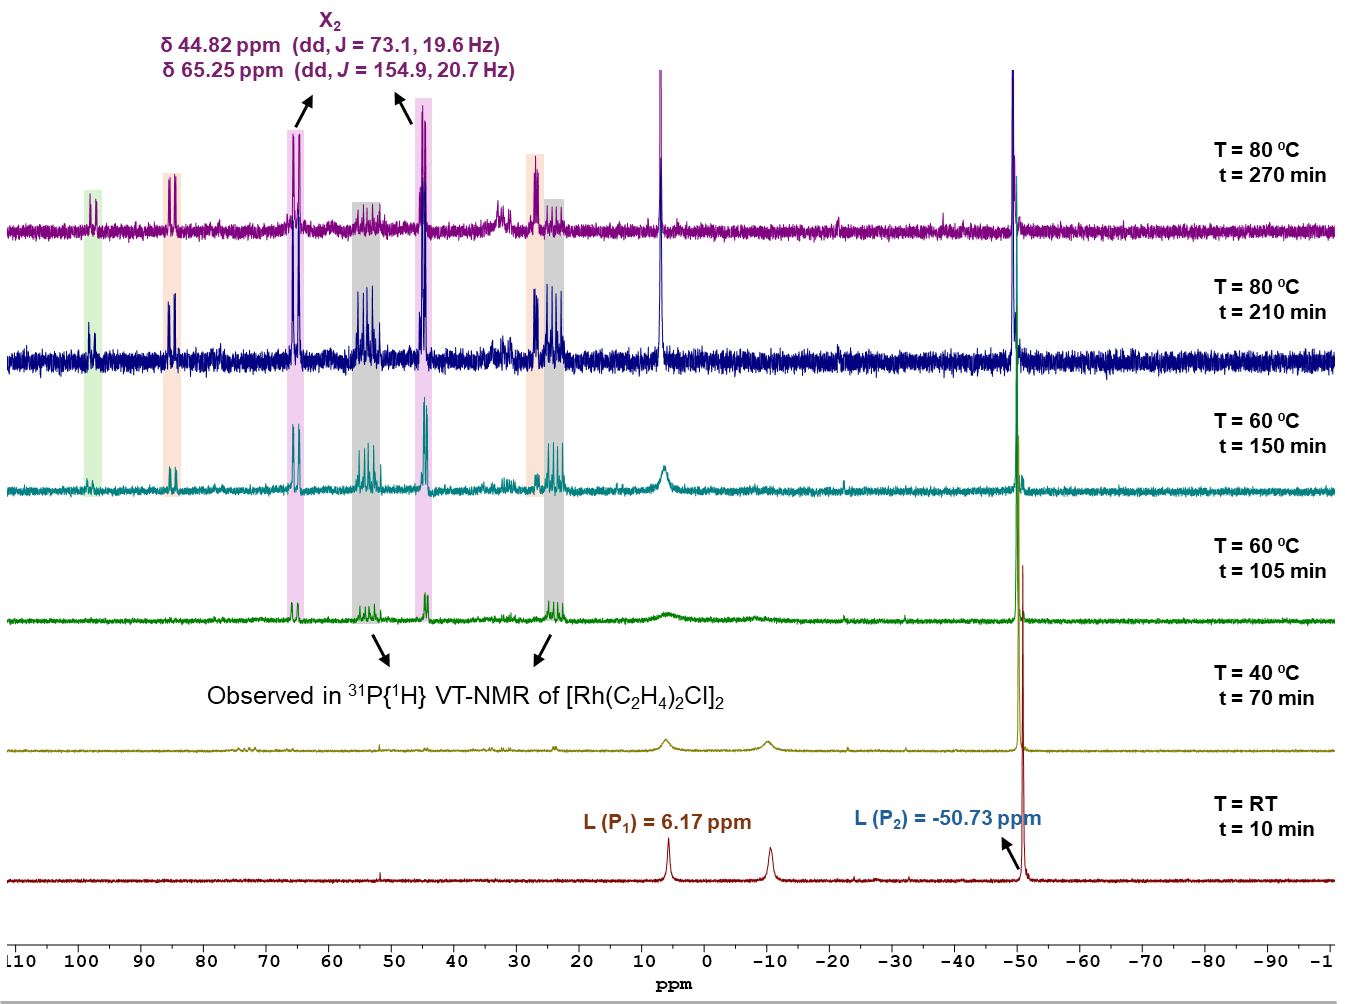
**

**Figure S7**. 31P{1H} VT-NMR in the presence of PhB(OH)2

**3.3.** **31P{1H} VT-NMR with [Rh(C2H4)2Cl]2, Josiphos and Phenylboronic Acid**

[Rh(C2H4)(Cl)]2 (9.7 mg, 0.025 mmol, 1.0 equiv), Josiphos (18.4 mg, 0.025 mmol, 1.0 equiv), PhB(OH)2 (30.5 mg, 0.25 mmol, 10.0 equiv), and K2CO3 (13.8 mg, 0.10 mmol, 4.0 equiv) were charged into an oven-dried 2.5 mL vial under a nitrogen atmosphere, followed by the addition of 0.75 mL toluene and 75.0 μL of distilled H2O. The resulting mixture was stirred for 10 minutes at room temperature and then transferred to an oven-dried NMR tube for ³¹P{¹H} VT-NMR measurements over a temperature range from room temperature to 60 °C. Peaks highlighted in grey color were also observed in the above 31P{1H} VT-NMR (Section 3.2.) and, during the synthesis of **X1** complex (Section 2). These results indicate that the dirhodium(II) most likely undergoes disproportionation to generate monorhodium(I) and monorhodium(III) species under the reaction conditions.

**31P{1H} NMR** (162 MHz, Toluene)

δ 74.09 (dd, *J* = 208.3, 41.8 Hz), 67.50 (dd, *J* = 205.7, 44.9 Hz), 53.87 (dd, *J* = 233.3, 141.6 Hz), 35.27 (dd, *J* = 207.9, 42.0 Hz), 23.70 (dd, *J* = 233.0, 131.5 Hz).


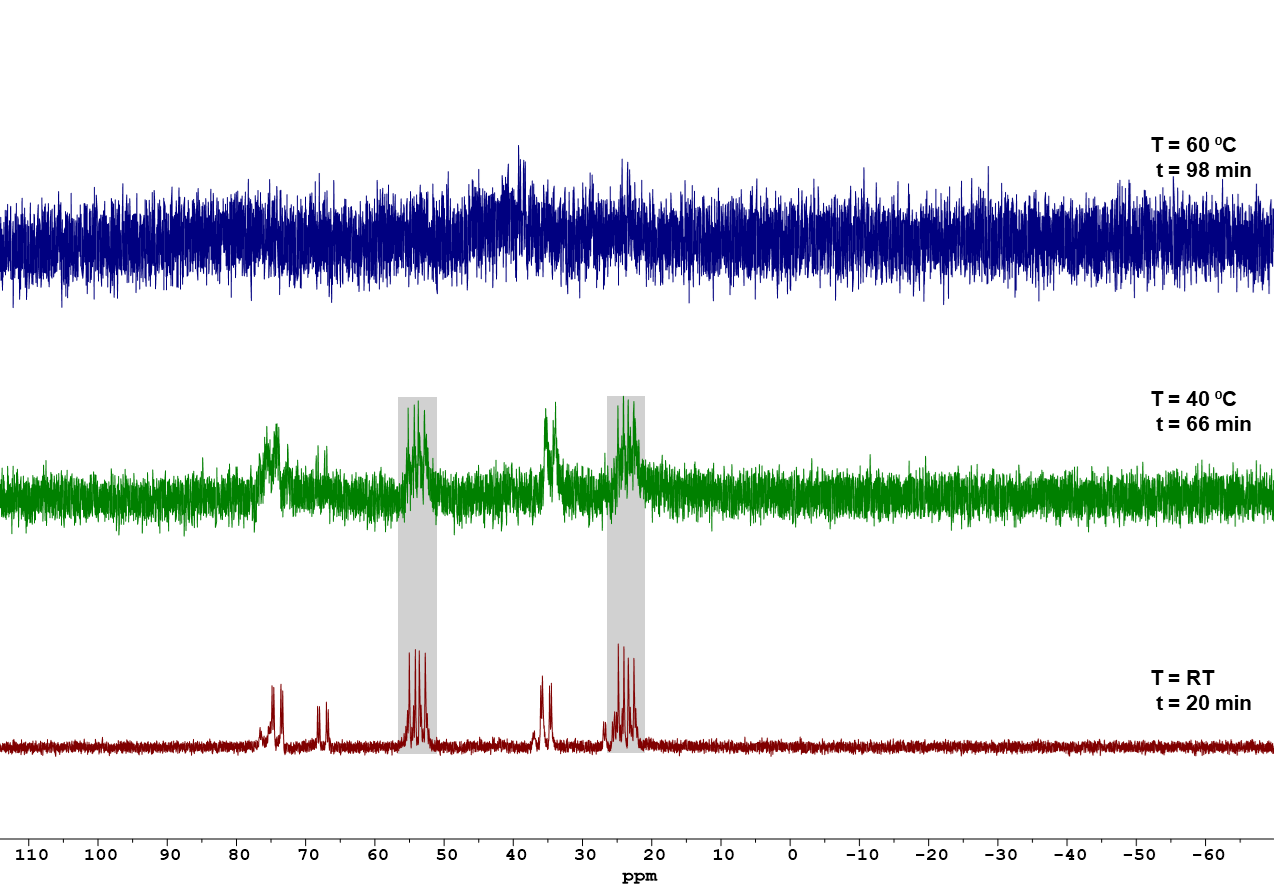


**Figure S8**. 31P{1H} VT-NMR with [Rh(C2H4)2Cl]2/Josiphos in the presence of PhB(OH)2

1. **Control Experiments with [Rh(C2H4)2Cl]2 and Josiphos**

[Rh(C2H4)(Cl)]2 (9.7 mg, 0.025 mmol, 1.0 equiv) and Josiphos (18.4 mg, 0.025 mmol, 1.0 equiv) were charged into an oven-dried 2.5 mL vial under a nitrogen atmosphere, followed by the addition of 0.75 mL toluene. The resulting mixture was stirred for 30 minutes at room temperature and then transferred to an oven-dried NMR tube for 31P{1H} NMR analysis. In the same solution, K2CO3 (13.8 mg, 0.10 mmol, 4.0 equiv) and 75.0 µL of H2O were added and the reaction was monitored for 40 min; no change in the spectra was observed. 31P{1H} NMR spectrum was recorded in non-deuterated toluene. Moreover, no common signals were detected when compared with the control experiment performed with the dirhodium(II) tetracarboxylate system.

**31P{1H} NMR** (162 MHz, Toluene)

**
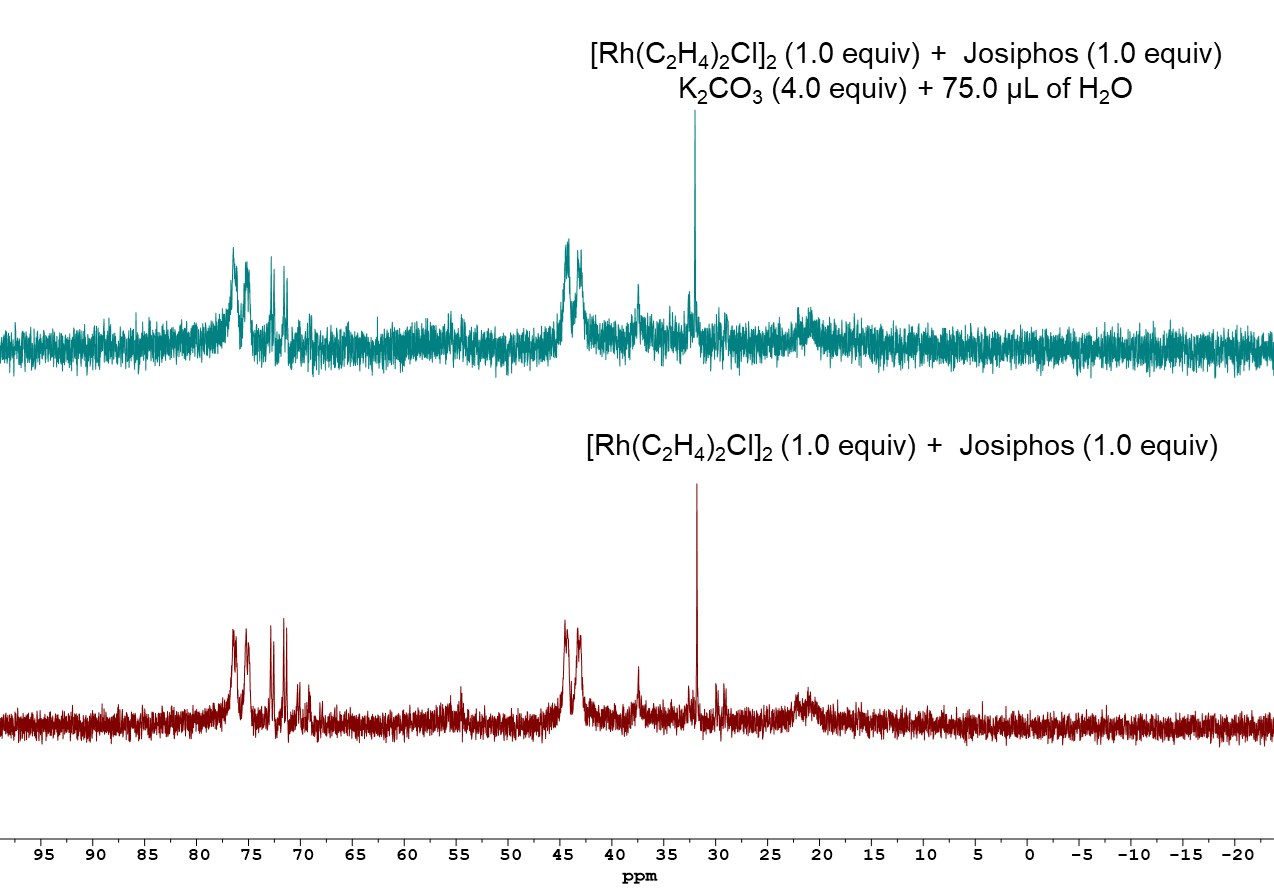
**

**Figure S9**. 31P{1H} NMR of reaction mixture

**5. Investigation of the Chloride Source in X1**

**5.1. Identification of Chloride Contamination in BLD Dirhodium(II)**

Surprisingly, the electron density map at the sixth coordination site in the **X1** complex corresponds to a chloride ligand in the X-ray diffraction data, despite no chlorine-containing reagents being used during the synthesis. The **35Cl NMR** spectrum of the **X1** complex was recorded, confirming the presence of a chloride ligand with a resonance at 34.77 ppm, as given above in Section 2. This observation is most likely due to the incorporation of a chlorine impurity from the commercially purchased dirhodium(II) tetracarboxylate precursor, which is commonly synthesized from RhCl₃. To support this hypothesis, several experiments were performed using dirhodium(II) tetracarboxylate purchased from TCI and Sigma-Aldrich.

First, the reaction for the synthesis of **X1** was set up using dirhodium(II) tetracarboxylate purchased from both TCI and Sigma-Aldrich. The procedure was the same as described in Section 2, and no peaks corresponding to the **X1** complex were observed in the 31P{1H} NMR spectra of the reaction mixture. However, the addition of 2.0 equiv of KCl to the TCI dirhodium(II) tetracarboxylate afforded the **X1** complex, as shown below, confirming the incorporation of an external chlorine atom.

**31P{1H} NMR** (162 MHz, Toluene)


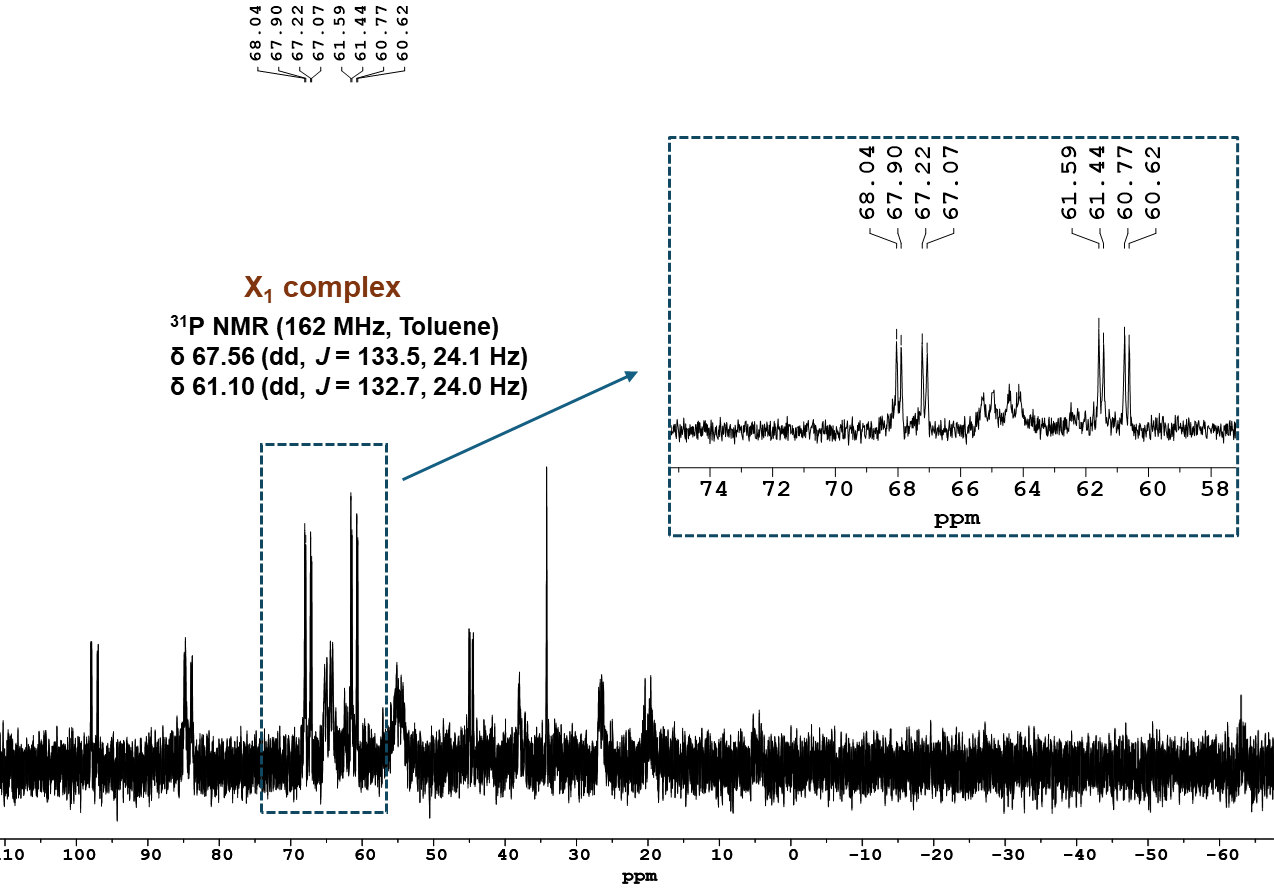


**Figure S10**. 31P{1H} NMR of reaction mixture

**5.2. Detection of Transmetalated Complex (X2) with TCI Dirhodium(II)**

31P{1H} VT-NMR, as performed in Section 3.2, was also monitored using TCI-sourced dirhodium(II) tetracarboxylate. The procedure was the same as described in Section 3.2. Both the transmetalated complex (**X2**) (green diamond) and the complex exhibiting peaks at 54.16 ppm and 23.96 ppm (orange diamond) were also observed in this experiment. The latter complex was also detected in the experiment with [Rh(C2H4)2Cl]2 in Section 3.2 and during the synthesis of the **X1** complex described in Section 2.

This experiment indicates that, with both BLD- and TCI dirhodium(II) tetracarboxylate, the same C–H metalated monorhodium(III) species is formed, with the only difference being the identity of the sixth ligand. In the case of the BLD dirhodium(II) precursor, the sixth ligand is a chloride ligand, whereas for the TCI dirhodium(II) precursor it is most likely an acetate ligand, or alternatively a cationic complex with acetate as the counteranion.

**31P{1H}** **NMR** (162 MHz, Toluene)


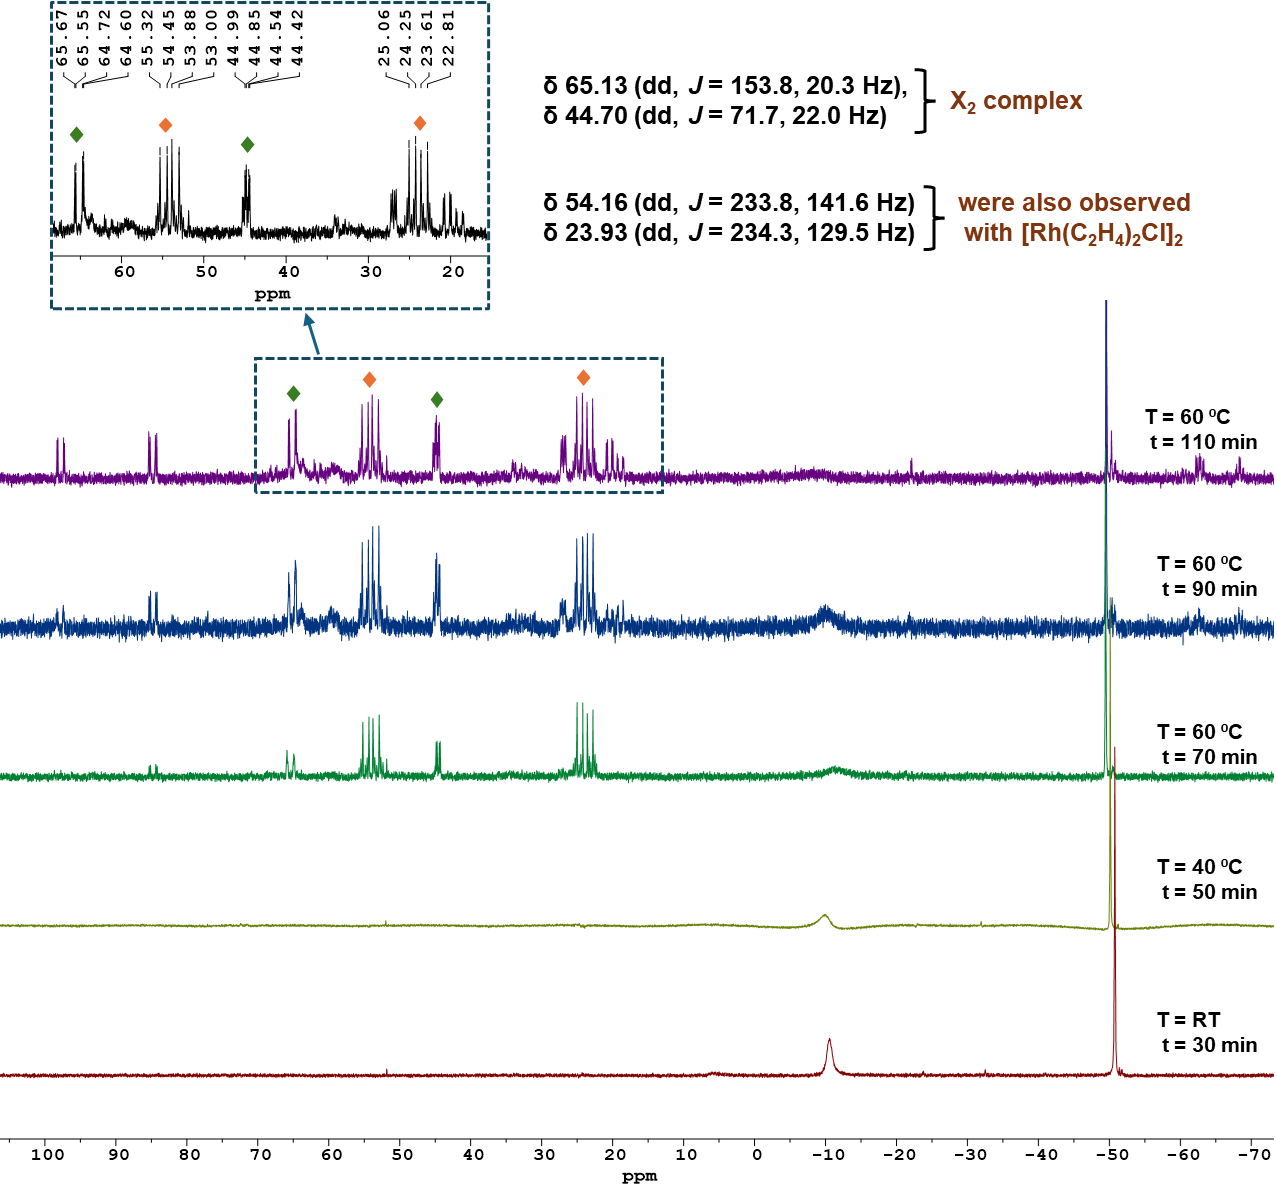


**Figure S11**. 31P{1H} VT-NMR

- 1. **Experiments to Detect the Active Species Forming with TCI Dirhodium(II)**

Two experiments were performed to detect the possible active species formed with TCI dirhodium(II) tetracarboxylate: (1) in the presence of KCl and (2) in the absence of KCl.

Common Procedure.

(1) An oven-dried 5 mL Schlenk tube equipped with a magnetic stir bar was charged with Rh₂(OAc)₄ (22.0 mg, 0.05 mmol, 1.0 equiv), Josiphos ligand (73.8 mg, 0.10 mmol, 2.0 equiv), phenylboronic acid (61.0 mg, 0.50 mmol, 10.0 equiv), and KCl (13.8 mg, 0.10 mmol, 2.0 equiv) under a nitrogen atmosphere. Toluene (1.5 mL) and water (0.15 mL) were then added under an inert atmosphere. The resulting mixture was stirred at 60 °C for 2 h. An 0.6 mL of the reaction mixture was transferred to a flame-dried NMR tube, and the 31P{1H} NMR spectrum was recorded in non-deuterated toluene and observed peaks corresponding to **X1**(yellow diamond).

(2) The same experiment was performed under identical conditions without KCl, and the reaction mixture was stirred for 4 h and ³¹P{¹H} NMR spectrum was recorded in non-deuterated toluene.

Upon comparison of the 31P{1H} NMR spectra, it was observed that in the presence of KCl, peaks corresponding to the **X1** complex were detected. In contrast, in the absence of KCl, two new resonances appeared at 57.63 and 62.54 ppm (red diamond) in the 50–65 ppm region. Notably, these signals are absent in the previously recorded ³¹P{¹H} VT-NMR spectrum obtained with TCI dirhodium in the presence of phenylboronic acid (Section 5.2).

Collectively, these results suggest that the resonances at 57.63 ppm and 62.54 ppm (red diamond) most likely correspond to an active species bearing an acetate ligand instead of chloride. Alternatively, the species may be cationic in nature, with acetate acting as the counteranion as shown in Figure S12.

**31P{1H} NMR** (162 MHz, Toluene)

**
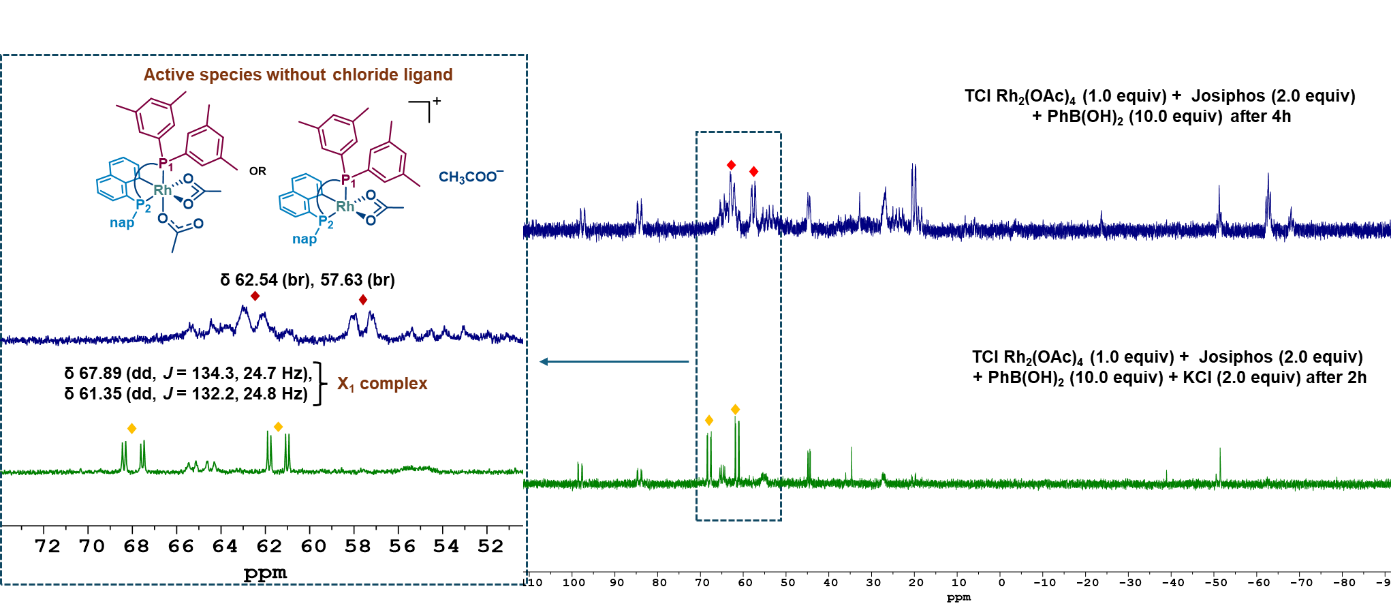
Figure S12**. 31P{1H} NMR of reaction mixture

**6. Role of Additives in Dissociation of Rh-Rh bonds**

A series of additive‑controlled experiments with phenylboronic acid, K2CO3, H2O were monitored over a 4 h period. Procedure is same as experiments given in section 5.3. All 31P{1H} NMR were recorded in non-deuterated toluene.

**6.1. Rh₂(OAc)₄ (22.0 mg, 0.05 mmol, 1.0 equiv) + Josiphos ligand (73.8 mg, 0.10 mmol, 2.0 equiv) + Phenylboronic acid (61.0 mg, 0.50 mmol, 10.0 equiv) + Toluene (1.5 mL).**

No peaks correspond to **X1** complex were detected.

**31P{1H} NMR** (162 MHz, Toluene)

**Figure S13**. 31P{1H} NMR of reaction mixture

- 1. **Rh₂(OAc)₄ (22.0 mg, 0.05 mmol, 1.0 equiv) + Josiphos ligand (73.8 mg, 0.10 mmol, 2.0 equiv) + Toluene (1.5 mL)**

No peaks correspond to **X1** complex were detected.

**31P{1H} NMR** (162 MHz, Toluene)

**Figure S14**. 31P{1H} NMR of reaction mixture

- 1. **Rh₂(OAc)₄ (22.0 mg, 0.05 mmol, 1.0 equiv) + Josiphos ligand (73.8 mg, 0.10 mmol, 2.0 equiv) + Phenylboronic acid (61.0 mg, 0.50 mmol, 10.0 equiv) + Toluene (1.5 mL) + H2O (0.15 mL)**

Peaks correspond to **X1** complex were detected highlighting the importance of water and phenylboronic acid for the formation of **X1** complex.

**31P{1H} NMR** (162 MHz, Toluene)

**
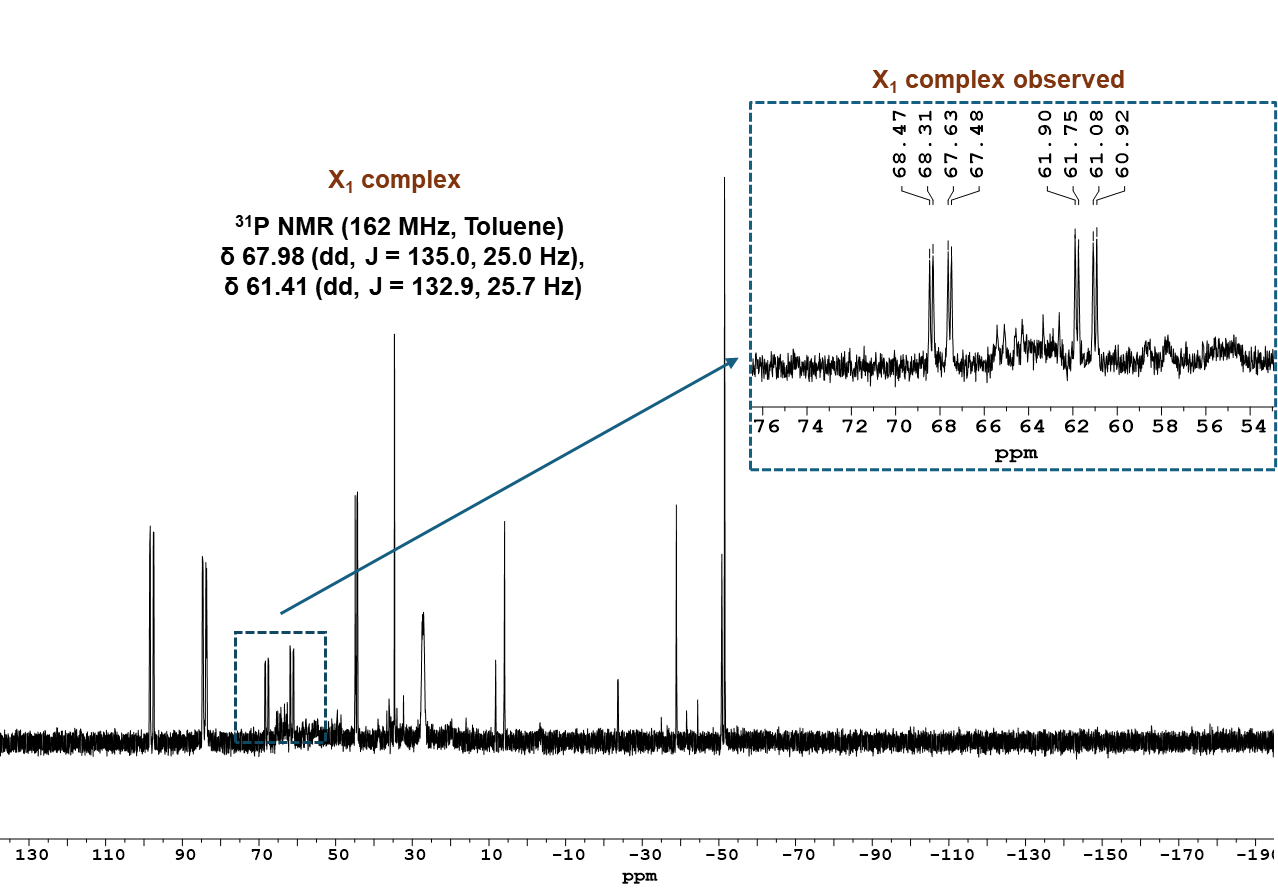
**

**Figure S15**. 31P{1H} NMR of reaction mixture

- 1. **Rh₂(OAc)₄ (11.0 mg, 0.025 mmol, 1.0 equiv) + Josiphos ligand (37.0 mg, 0.50 mmol, 2.0 equiv) + Toluene (0.75 mL) + H2O (0.75 µL)**

Very small Peaks correspond to **X1** complex (yellow diamond) were detected.

**31P{1H} NMR** (162 MHz, Toluene)

**
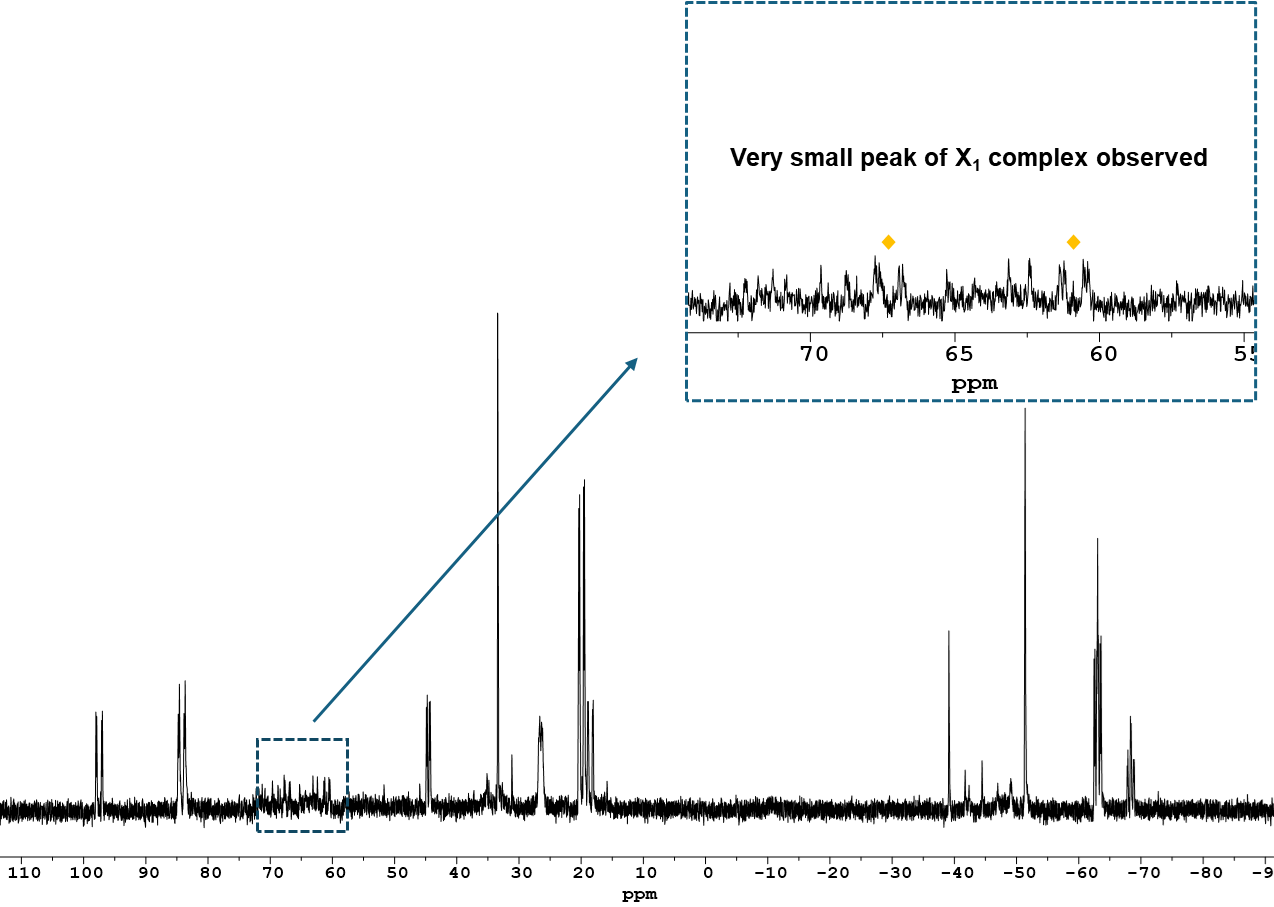
**

**Figure S16**. 31P{1H} NMR of reaction mixture

- 1. **Rh₂(OAc)₄ (11.0 mg, 0.025 mmol, 1.0 equiv) + Josiphos ligand (37.0 mg, 0.05 mmol, 2.0 equiv) + Phenylboronic acid (30.5 mg, 0.25 mmol, 10.0 equiv) + Toluene (0.75 mL) + H2O (0.75 µL) + K2CO3 (13.8 mg, 0.10 mmol, 4.0 equiv)**

Peaks correspond to **X2** complex were detected.

**31P{1H} NMR** (162 MHz, Toluene)

**
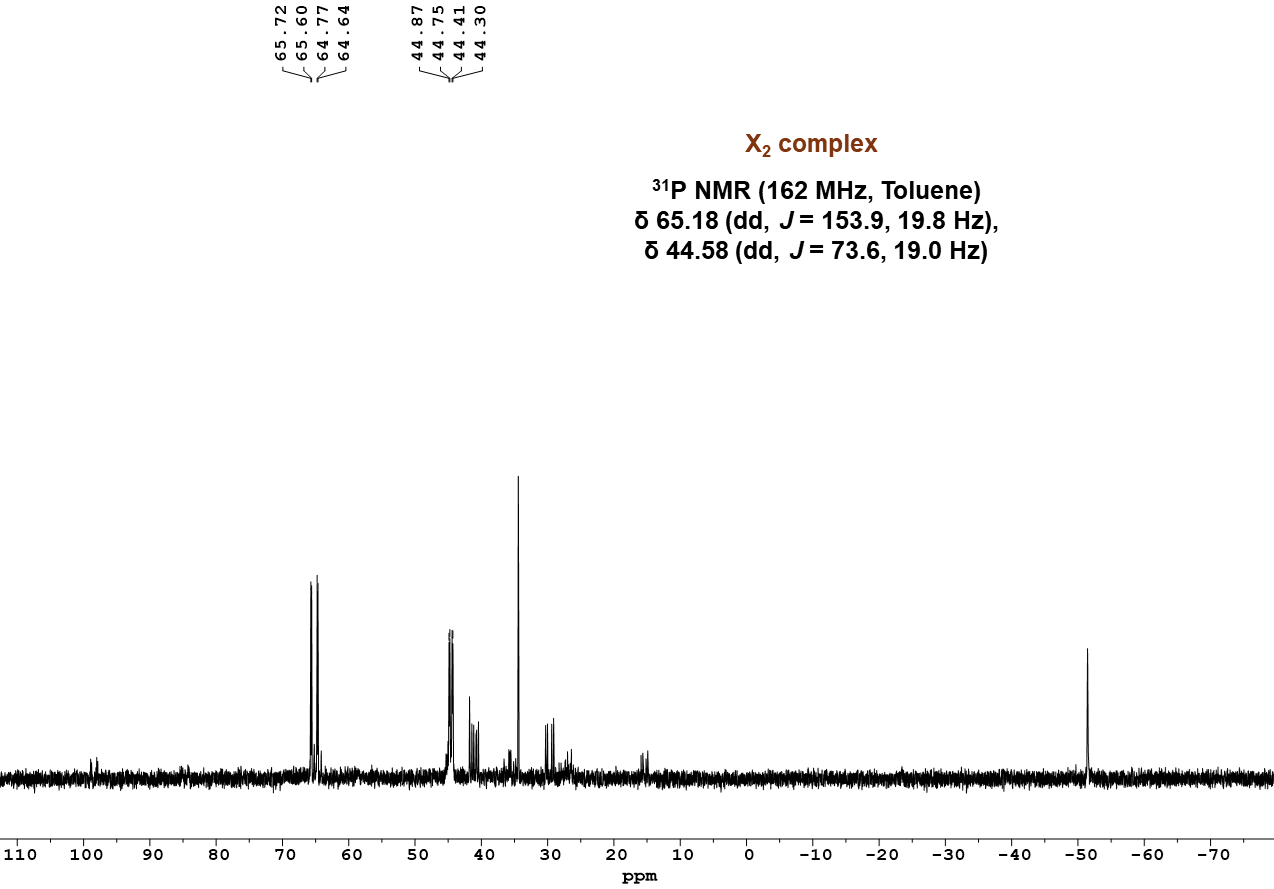
**

**Figure S17**. 31P{1H} NMR of reaction mixture

- 1. **Rh₂(OAc)₄ (11.0 mg, 0.025 mmol, 1.0 equiv) + Josiphos ligand (37 mg, 0.05 mmol, 2.0 equiv) + Toluene (0.75 mL) + H2O (0.75 µL) + K2CO3 (13.8 mg, 0.10 mmol, 4.0 equiv)**

No peaks correspond to **X1** complex were detected.

**31P{1H} NMR** (162 MHz, Toluene)

**Figure S18**. 31P{1H} NMR of reaction mixture

**7. Detection and Characterization of Transmetalated Complex (X2)**

An oven-dried 5.0 mL round-bottom flask equipped with a magnetic stir bar was charged with the X1 complex (18.7 mg, 0.02 mmol, 1.0 equiv), PhB(OH)₂ (4.88 mg, 0.04 mmol, 2.0 equiv), and K₂CO₃ (5.52 mg, 0.04 mmol, 2.0 equiv) under a nitrogen atmosphere. Toluene (0.8 mL) was added, followed by H₂O (80 μL). The reaction mixture was stirred for 10 min at room temperature, after which a 0.6 mL aliquot was transferred to an oven-dried NMR tube for 31P{1H} NMR analysis.

The dd signals at δ 61.42 and 68.54 ppm (yellow diamond), assigned to **X1**, disappeared completely. Concomitantly, a new pair of dd signals at δ 44.31 and 65.80 ppm (green diamond) emerged, corresponding to **X2**. No additional phosphorus-containing species were detected, consistent with a direct transmetalation event at the rhodium center.

ESI-HRMS analysis of **X2** revealed a dominant peak at m/z 917.1806, consistent with a monorhodium(III) transmetalated complex. Collectively, these data unambiguously confirm that the resonances at δ 44.31 and 65.80 ppm arise from the monorhodium transmetalated species **X2**.


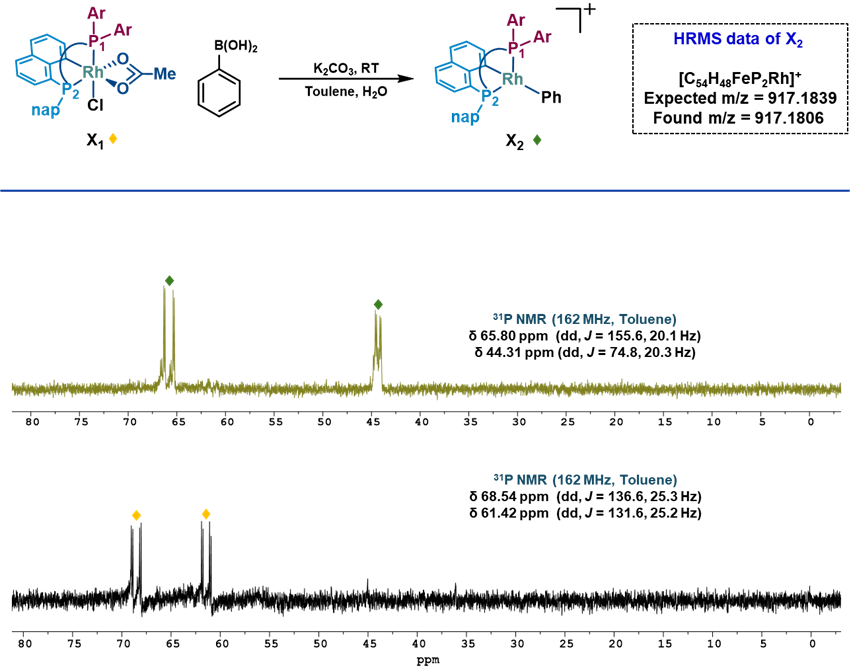


**Figure S19**. 31P{1H} NMR of controlled experiment monitored for the formation of **X2** from **X1** complex

**8. Synthesis of Compound 1a**

4,5-dimethylphenanthrene-9,10-dione (1a) was prepared according to reported procedure.1

**1H NMR** (400 MHz, CDCl3) δ 7.90 (d, *J* = 7.5 Hz, 2H), 7.59 (d, *J* = 7.7 Hz, 2H), 7.41 (td, *J* = 7.6, 1.5 Hz, 2H), 2.36 (s, 6H).

**13C NMR** (101 MHz, CDCl3) δ 185.03, 138.05, 137.38, 137.37, 130.99, 128.41, 126.87, 20.75.

**Figure S20**. 1H NMR of **1a**


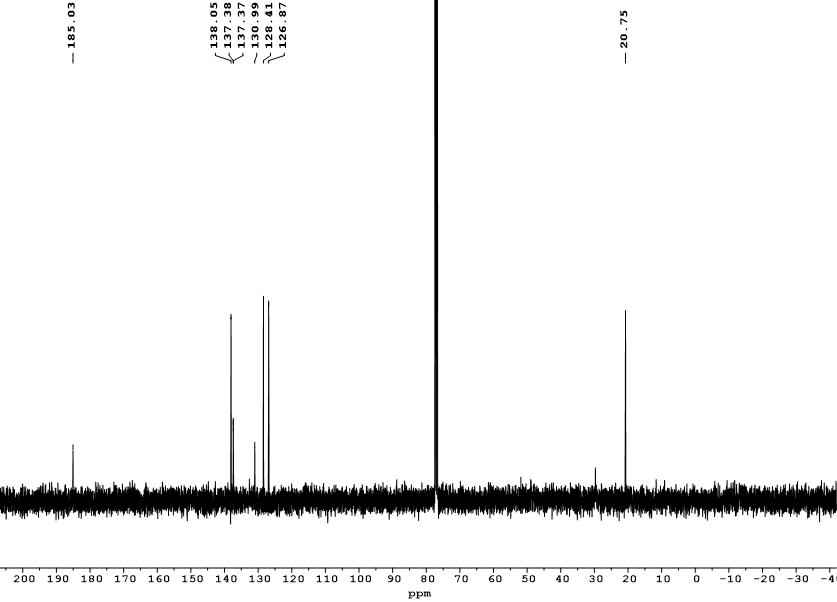


**Figure S21**. 13C NMR of **1a**

**9. Catalytic activity of X1 complex**

**Table S1:** Comparative catalytic evaluation of **X1** and other Rh catalysts

**
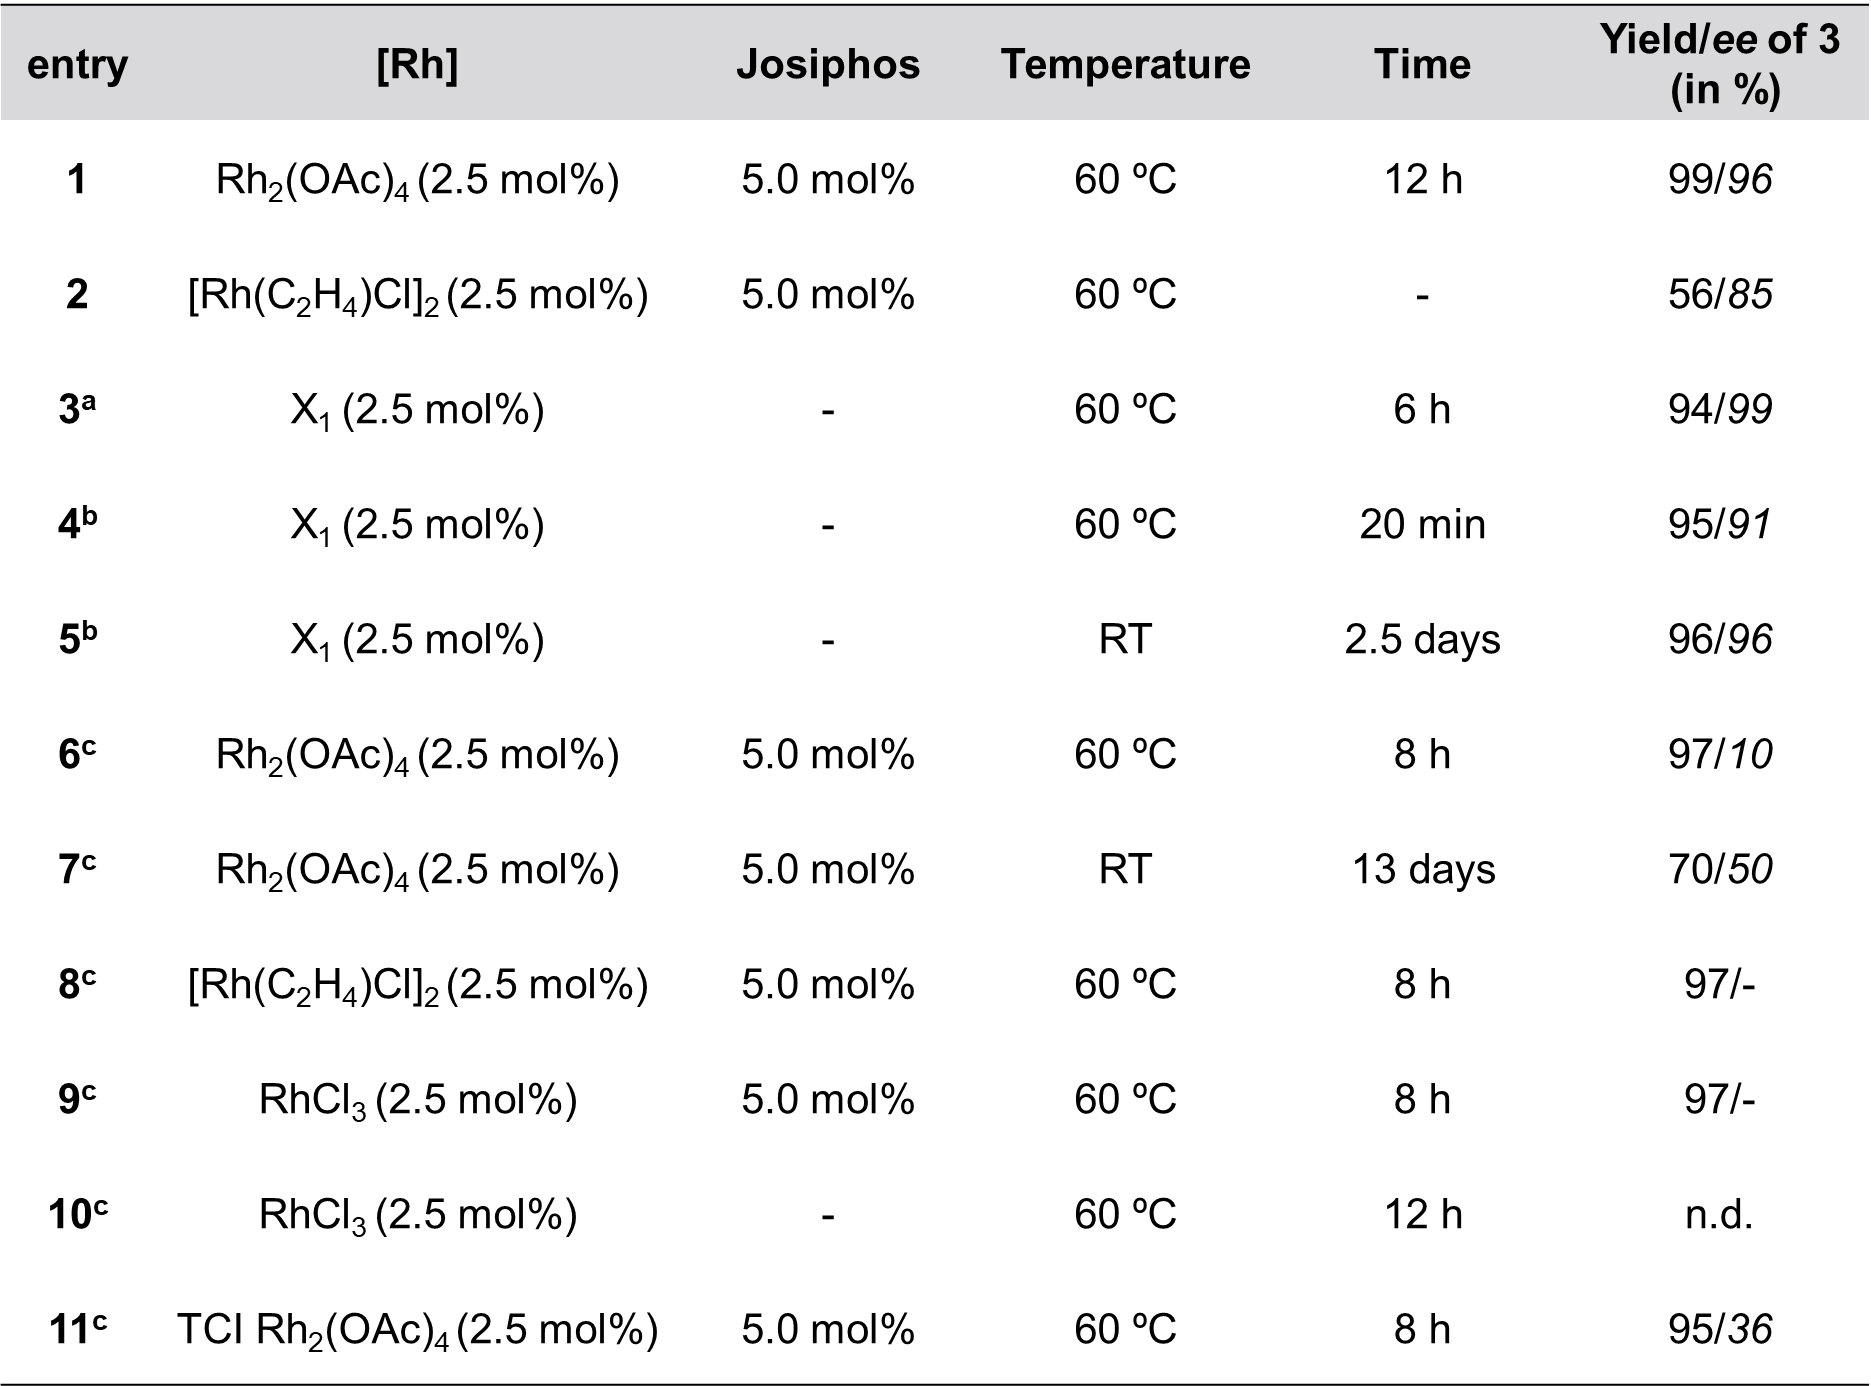
**

Entries 1& 2 were taken from Gu’ s work28 where **1** is **1a**. aConditions: **1a** (0.4 mmol), **2** (1.0 mmol), K2CO3 (0.40 mmol), Toluene (3.0 mL) and H2O (0.3mL). bConditions: **1b** (R = H, 0.1 mmol), **2** (0.9 mmol), K2CO3 (0.1 mmol), Toluene (0.8 mL), H2O (80 µL). cConditions: **1b** (0.3 mmol), **2** (0.75 mmol), K2CO3 (0.3 mmol), Toluene (2.0 mL), H2O (0.2 mL). n.d. (not detected).

**9.1. With substrate 1a**

An oven-dried 5.0 mL Schlenk tube equipped with a magnetic stir bar was charged with **1a** (94.5 mg, 0.40 mmol, 1.0 equiv), phenylboronic acid (122.0 mg, 1.0 mmol, 2.5 equiv), X1 (9.2 mg, 2.5 mol%) and K2CO3 (55.3 mg, 0.40 mmol, 1.0 equiv) in toluene (3.0 mL) and deionized water (0.3 mL) was heated at 60 °C for 6 h. After being cooled to room temperature, the solvent was evaporated under reduced pressure. The crude product was purified by flash column chromatography on silica gel (Hexane/EtOAc = 100:10) to afford **3a** (118.5 mg, 94 %, 99 % *ee*).

**1H NMR (400 MHz, CDCl3)**: δ 7.65 (d,1H), 7.47-7.37(m,4H), 7.21- 7.17(m,1H), 7.11(m,5H), 4.81(s,1H), 2.34(s,3H), 2.30(s,3H). **13C NMR (101 MHz, CDCl3)**: δ 201.56, 141.38, 137.08, 136.45, 136.04, 135.99, 135.39, 132.28, 131.30, 130.80, 128.39, 128.17, 127.97, 127.58, 126.48, 124.17, 124.12, 81.22, 20.62, 20.34. **HRMS (ESI):** calcd for C22H18O2Na [M+Na]+ 337.1204, found 337.1206.


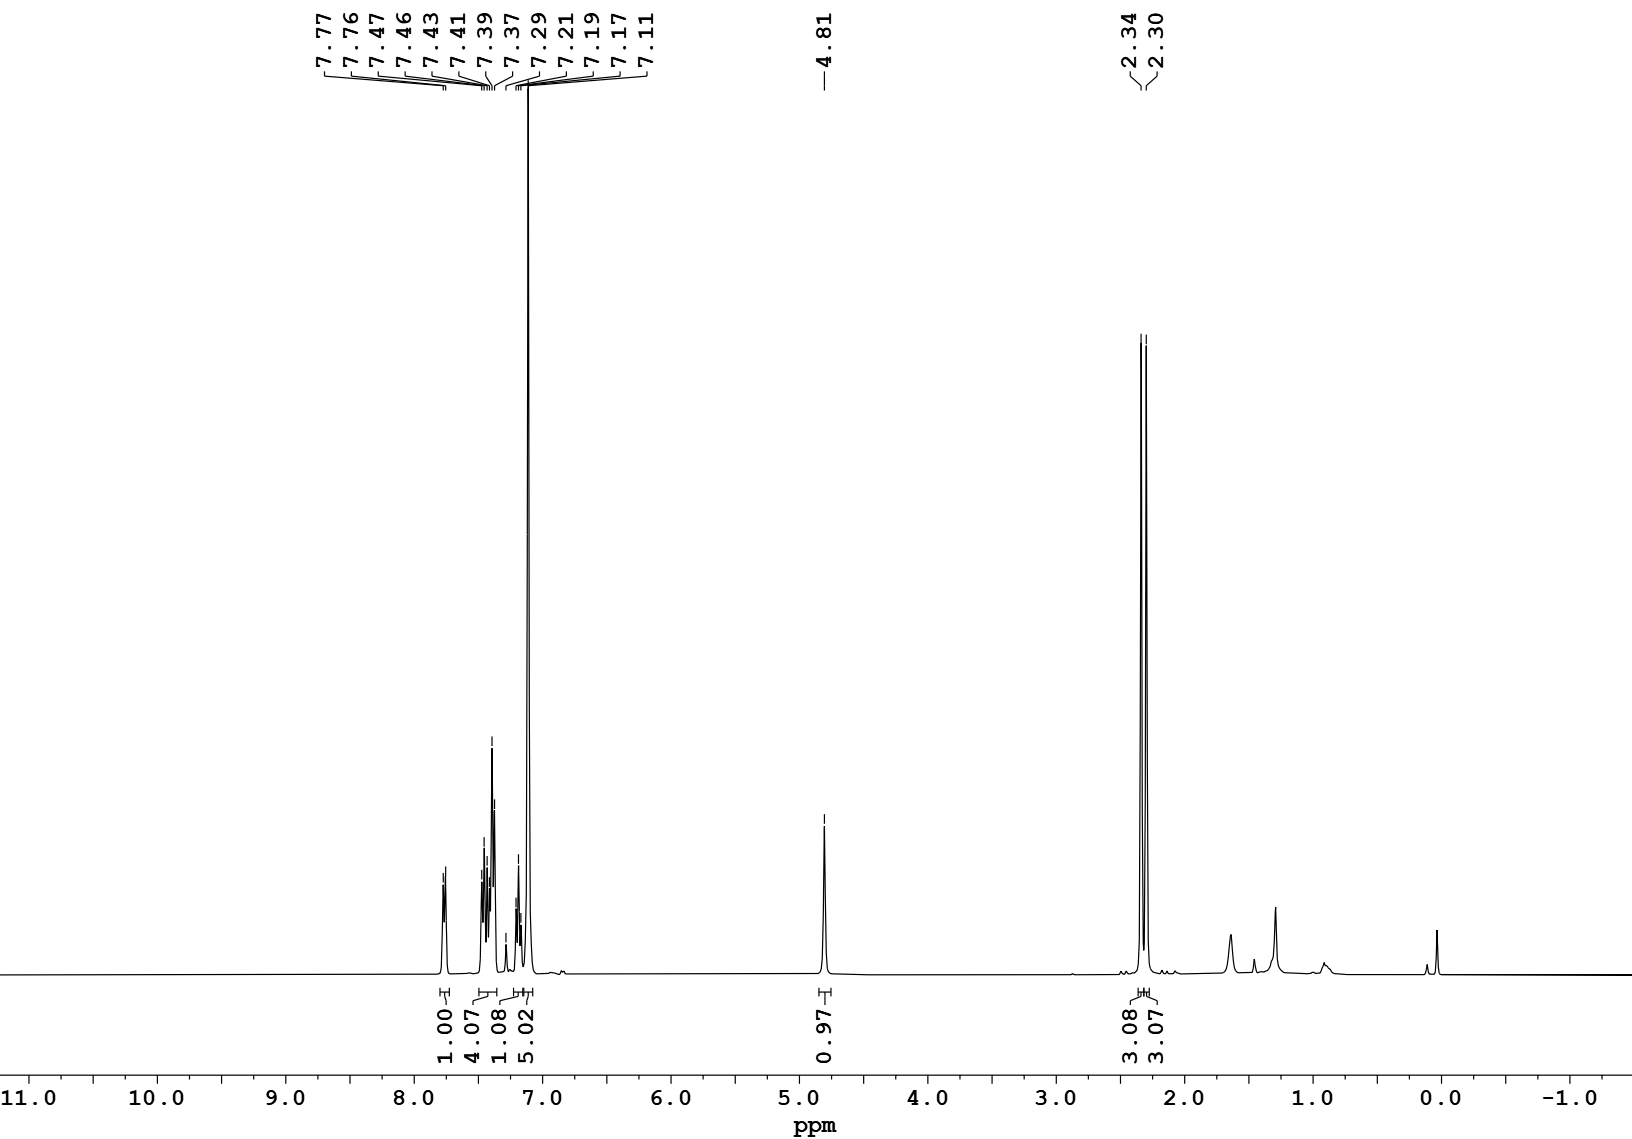


**Figure S21**. 1H NMR of **3a**

**
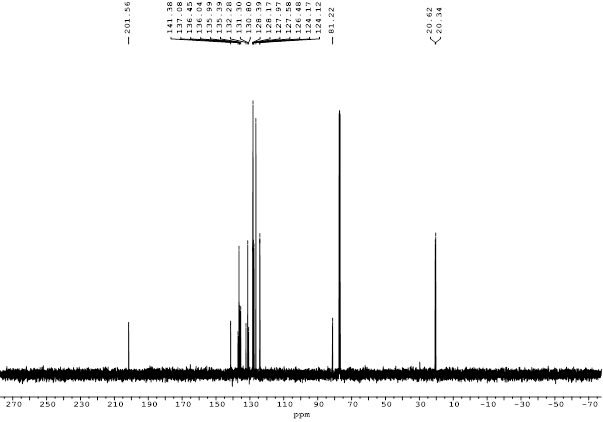
**

**Figure S21**. 13C NMR of **3a**

**< Chromatogram>**

CHIRALPAK IA,10 % IPA-Hexane, 1 mL/min, 254 nm


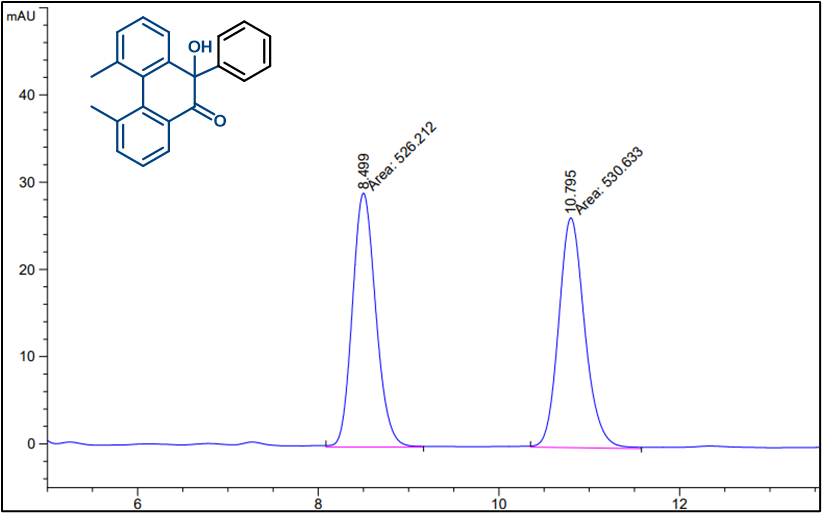


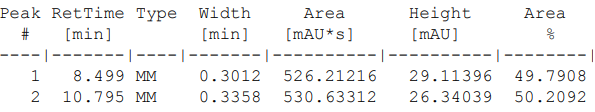


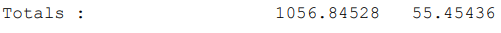


**< Chromatogram>**

CHIRALPAK IA,10% IPA-Hexane, 1 mL/min, 254 nm


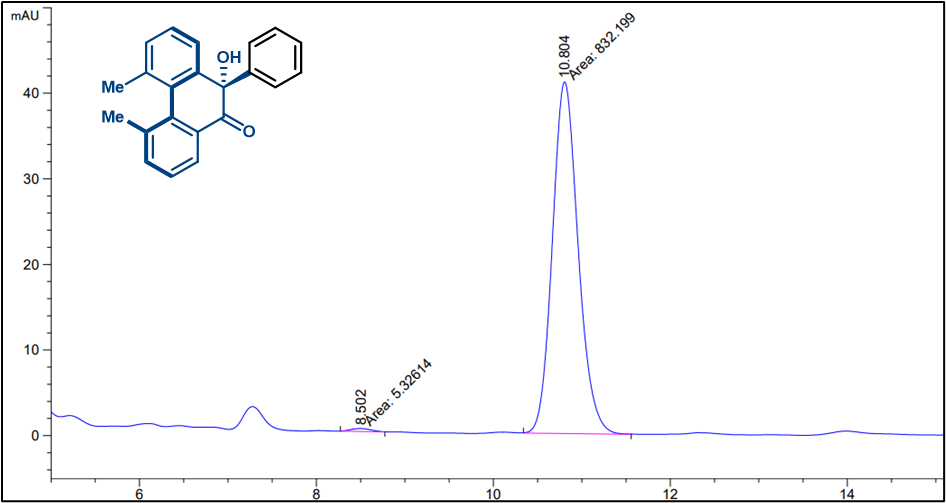


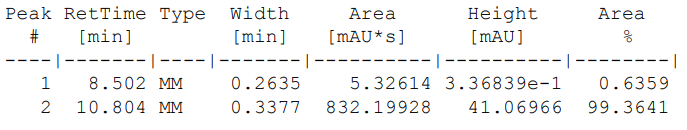


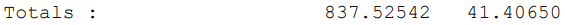


**9.2. With substrate 1b**

An oven-dried 5 mL Schlenk tube equipped with a magnetic stir bar was charged with 1a (20.8 mg, 0.10 mmol, 1.0 equiv), phenylboronic acid (30.5 mg, 0.25 mmol, 2.5 equiv), X1 (2.3 mg, 2.5 mol%) and K2CO3 (13.8 mg, 0.10 mmol, 1.0 equiv) in toluene (0.8 mL) and deionized water (80 µL) was heated at 60 °C for 8 h. After being cooled to room temperature, the solvent was evaporated under reduced pressure. The crude product was purified by flash column chromatography on silica gel (Hexane/EtOAc = 100:10) to afford **3b** (27.2 mg, 95 %, 91 % *ee*).

The same reaction was carried out using 2.5 mol% TCI dirhodium(II) together with 5.0 mol % of Josiphos ligand to examine the effect of dirhodium(II) purchased from different commercial sources on reactivity and enantioselectivity (Table S1, entry 11). The product, 3b, was obtained in 95% yield with 36.4% ee. Notably, similarly low enantioselectivities were observed irrespective of whether BLD or TCI dirhodium(II) was employed as the catalyst precursor.

**1H NMR (400 MHz, CDCl3)** δ 7.97 (dd, *J* = 11.6, 7.8 Hz, 2H), 7.83 (ddd, *J* = 16.8, 7.7, 1.7 Hz, 2H), 7.67 (td, *J* = 7.8, 1.6 Hz, 1H), 7.57 – 7.42 (m, 2H), 7.36 (t, *J* = 7.5 Hz, 1H), 7.19 (s, 4H), 4.93 (s, 1H). **13C NMR (101 MHz, CDCl3)** δ 201.38, 141.43, 139.53, 137.80, 135.20, 130.22, 129.69, 128.76, 128.51, 128.42, 128.12, 128.03, 127.83, 126.16, 123.81, 123.19, 80.38. **HRMS (ESI):** calcd for C20H14O2Na [M+Na]+ 309.0982, found 309.0894.

**1H NMR**

**Figure S22**. 1H NMR of **3b**

**13C NMR**

**Figure S22**. 13C NMR of **3b**

**< Chromatogram>**

CHIRAL PAK AD-H ,10% IPA-Hexane, 1 mL/min, 254 nm


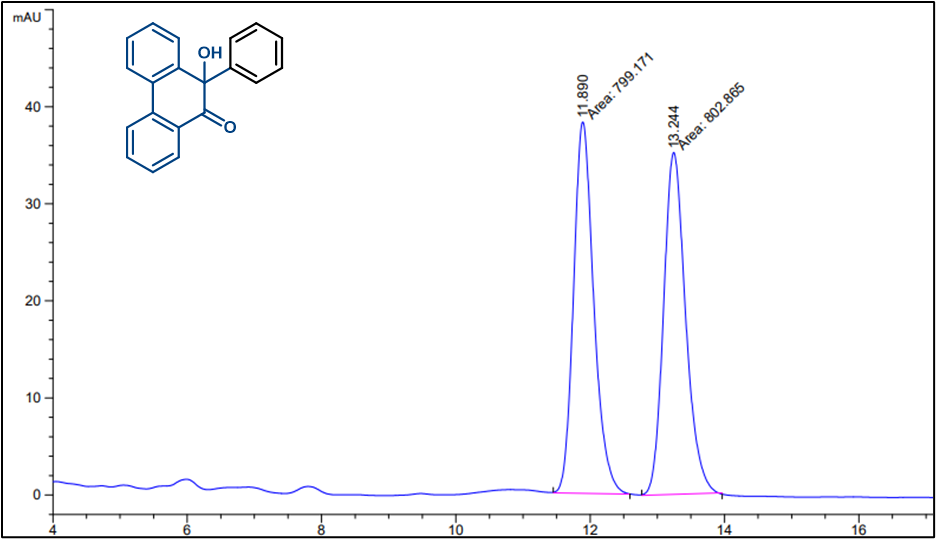


**
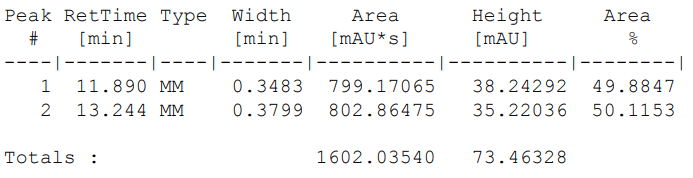
**

**< Chromatogram>**

CHIRAL PAK AD-H ,10% IPA-Hexane, 1 mL/min, 254 nm


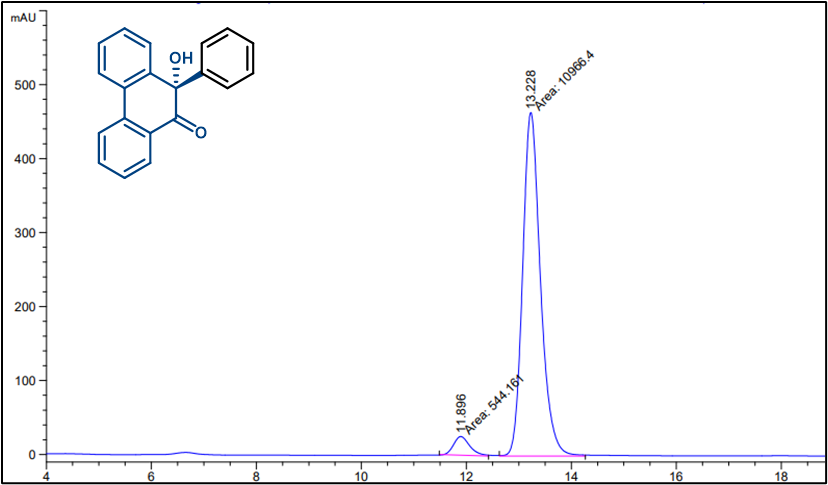


**
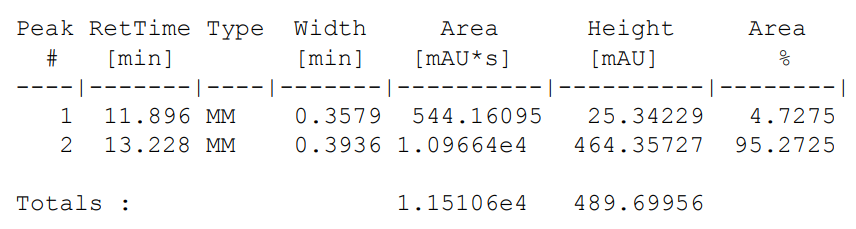
**

*Other reactions mentioned in table S1 follow the same procedure as mentioned above in Section 9.1 & 9.2.*

**10. ESI-HRMS data of X1 and X2 Complex**

**
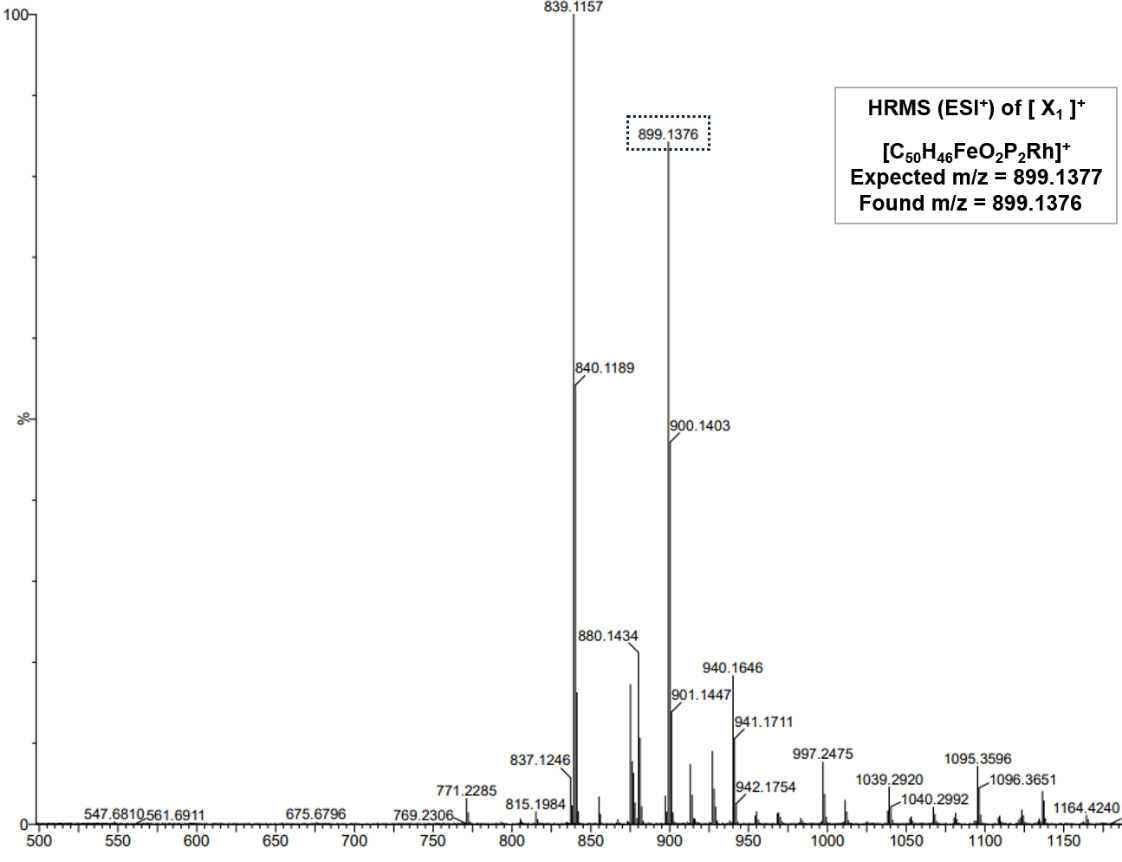
**

**
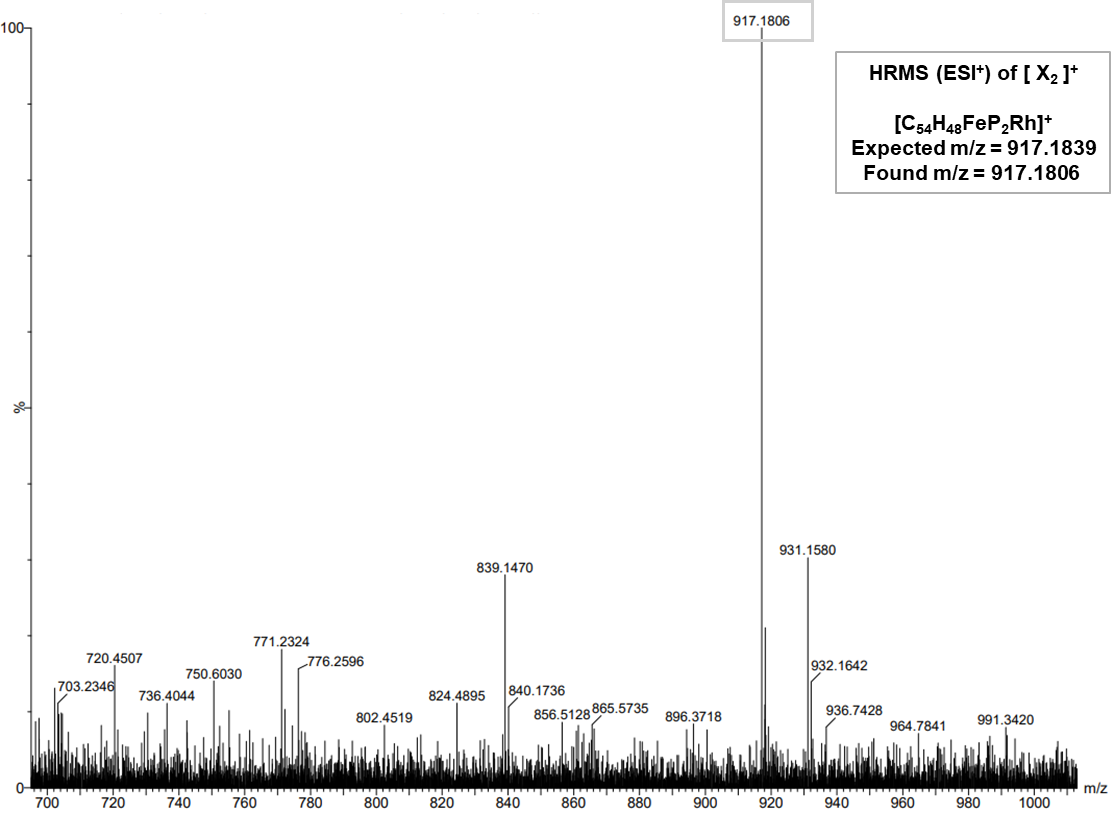
**

**11. Prior reported Dirhodium/phosphine complexes with their 31P chemical shift values**

**
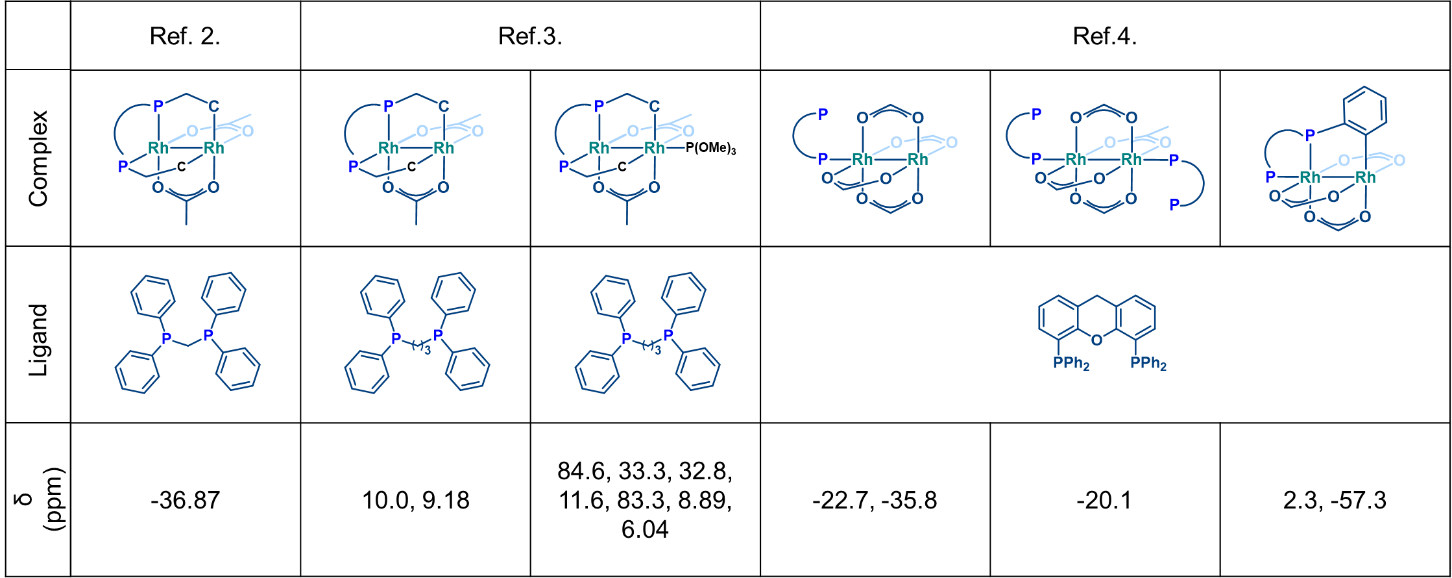
**

**
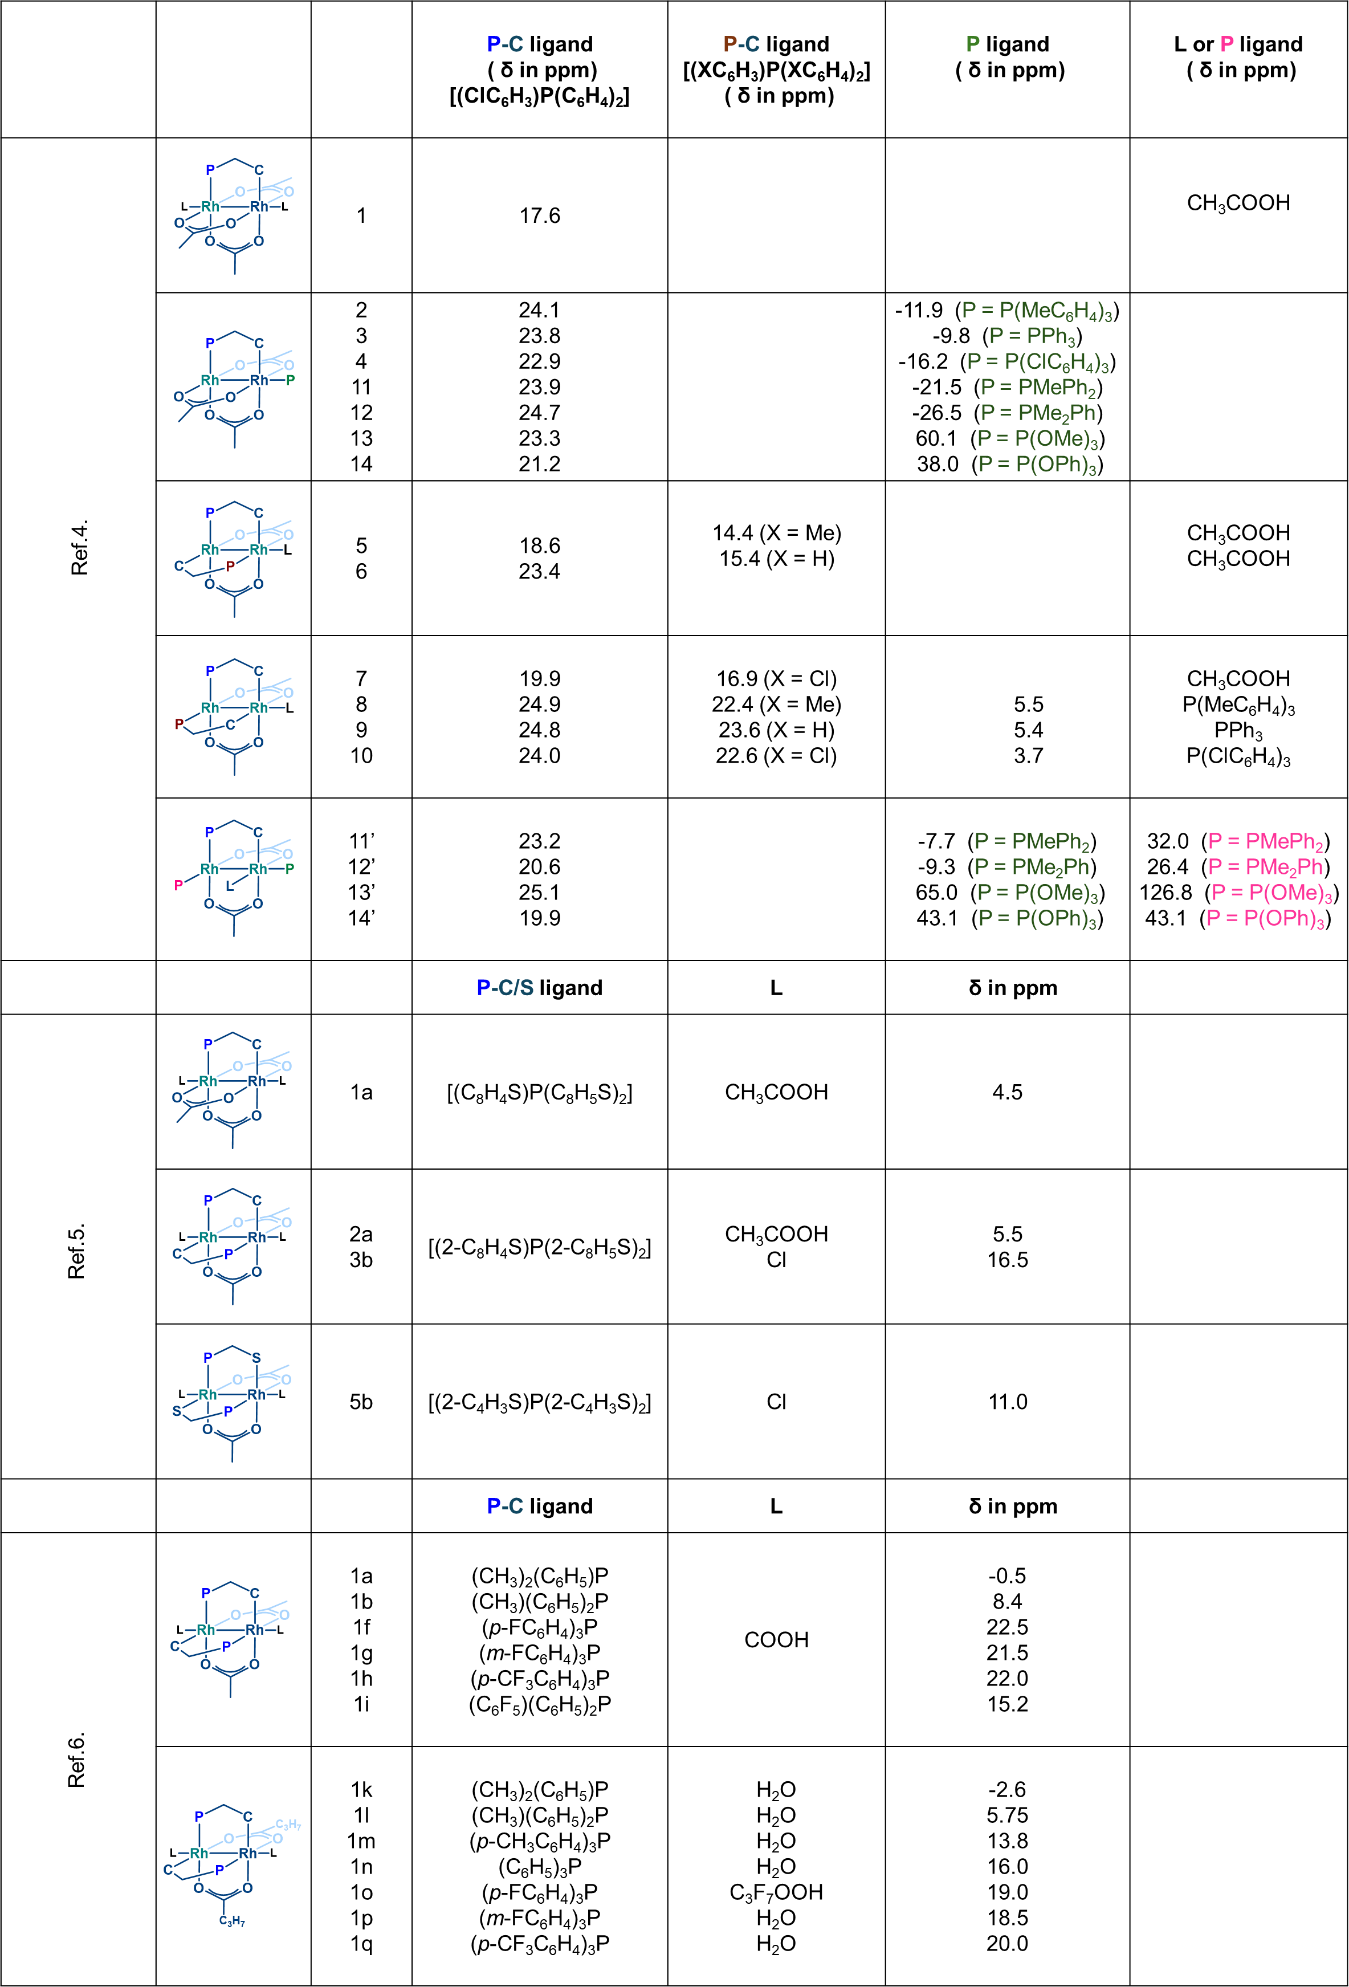
**

**12. X-ray Crystallography data of X1**

**Table S2: Crystallographic parameters for X1 at 150 K**

| Complex | **X1** |
| --- | --- |
| CCDC No | 2535072 |
| Temperature, K | 150 |
| Empirical Formula | C57H54ClFeO2P2Rh |
| Formula weight (g. mol-1) | 1027.15 |
| Crystal system | Monoclinic |
| Space group | *P* 21 (4) |
| Color and shape | Brownish red block |
| Wavelength | 0.71073 Å |
| *a*, Å | 9.569 (14) |
| *b*, Å | 19.01 (3) |
| *c*, Å | 13.374 (19) |
| *a*, o | 90 |
| *b,* o | 105.94 (2) |
| *g*, o | 90 |
| *V*, | 2340 (6) |
| *Z* | 2 |
| *dcal*, g cm-3 | 1.458 |
| *m,* mm-1 | 0.832 |
| F(000) | 1060 |
| *q* max | 24.499 |
| Completeness, % | 99.4 |
| Reflections collected | 7744 |
| unique reflections | 4038 |
| GOF on F2 | 0.982 |
| No. of Parameters | 585 |
| *R1*[I>2s(I)] | 9.71 |
| *wR2*[I>2s(I)] | 25.50 |
| *R1*= Σ⃓⃓Fo⃓-⃓Fc⃓⃓/Σ⃓Fo⃓ and *wR2*= ⃓Σw(⃓Fo⃓2-⃓Fc⃓2)⃓/Σ⃓w(Fo)2⃓1/2 | |

**Table S3: Selected bond distances for X1 at 150 K**

| Bond | **X1** |
| --- | --- |
| Rh1-Cl1 | 2.353 (7) |
| Rh1-P1 | 2.209 (7) |
| Rh1-P2 | 2.272 (7) |
| Rh1-O2 | 2.234 (16) |
| Rh1-O1 | 2.177 (17) |
| Rh1-C17 | 1.97 (2) |
| Rh1-C37 | 2.51 (2) |
| Fe1-C47 | 2.03 (3) |
| Fe1-C41 | 2.01 (3) |
| Fe1-C40 | 2.03 (3) |
| Fe1-C42 | 2.04 (3) |
| Fe1-C49 | 2.04 (3) |
| Fe1-C44 | 2.06 (2) |
| Fe1-C43 | 2.04 (2) |
| Fe1-C48 | 2.06 (3) |
| Fe1-C50 | 2.03 (3) |
| Fe1-C46 | 2.03 (3) |

**Table S4: CShM3 parameters for X1 at 150 K.**8-10

|  | **C.N. No.** | **HP** | **PPY** | **OC** | **TPR** | **JPPY** |
| --- | --- | --- | --- | --- | --- | --- |
| **Rh1** | 6 | 25.996 | 23.183 | 2.667 | 16.020 | 25.375 |

HP: Hexagon

PPY: Pentagonal pyramid

OC: Octahedron

TPR: Trigonal prism

JPPY: Johnson pentagonal pyramid J2

|  | **C. N. No.** | **DP** | **EPY** | **OBPY** | **PPR** | **PAPR** | **JBCCU** | **JBCSAPR** | **JMBIC** | **JATDI** | **JSPC** |
| --- | --- | --- | --- | --- | --- | --- | --- | --- | --- | --- | --- |
| **Fe1** | 10 | 32.554 | 28.160 | 22.636 | 18.119 | 19.787 | 22.519 | 22.100 | 19.314 | 20.605 | 19.993 |

DP: Decagon

EPY: Enneagonal pyramid

OBPY: Octagonal bipyamid

PPR: Pentagonal prism

PAPR: Pentagonal antiprism

JBCCU: Bicapped cube J15

JBCSAPR: Bicapped square antiprism J17

JMBIC: Metabidiminished icosahedron J62

JATDI: Augmented tridiminished icosahedron J64

JSPC: Sphenocorona J87

***Computational Studies***

**13. Computational details**

All calculations were performed using the DFT method implemented in Gaussian 16 software.11 Geometries of transition states and intermediates were optimized with the hybrid functional B3LYP with Grimme’s dispersion GD3BJ, using the standard split-valence Pople basis set 6-31G(d,p) for all atoms except Rh and Fe.12,15,16 For Rh and Fe, the SDD basis set was used with an effective core potential (ECP).13,17To ensure that each optimized geometry is either an energy minimum (with no imaginary frequencies) or a transition state (with only one imaginary frequency), frequency analyses were conducted at the same level of theory for all stationary points. IRC (Intrinsic Reaction Coordinate) calculations were performed to connect the TS to its corresponding minima.14,18 Single-point calculations were performed on the optimized structures using the triple-zeta basis set 6-311++G(d,p) for all atoms except Rh and Fe, for which SDD was used. All these single-point calculations were carried out using the B3LYP functional with Grimme’s dispersion GD3BJ, employing the SMD (Solvation Model Density) solvation model to simulate the solvation effects of toluene and water.19 The SMD model was parameterized using a weighted average of the dielectric constants of toluene and water (v/v = 10:1, ε = 9.2) from the Minnesota solvent descriptor database.20 The thermal corrections obtained from the geometry optimizations were added to the single-point electronic energies to give the thermochemical values (in this case, the free energies). Single-point calculations for key TSs and intermediates were also performed with different functionals and basis sets to check whether the trend is the same. The high-level ab initio DLPNO-CCSD(T) (domain-based local pair natural orbital coupled cluster method with single, double, and perturbative triple excitations) calculations were carried out for the stereodetermining TSs using the ORCA 5.0.4 software.21 Distortion and interaction (activation strain) analysis was performed by computing the energies at the PCM(solvent)/DLPNO-CCSD(T)/def2-TZVP//B3LYP-D3(BJ)/6-31G(d,p),SDD(Rh, Fe) level of theory.22,23 The PCM model was parameterized using a weighted average of the dielectric constants and refractive index of toluene and water (v/v = 10:1, ε = 9.2, n =1.47 ). Additional Single points were carried out at M06 and PBE1PBE functionals.24-27 QTAIM (Quantum Theory of Atoms in Molecules) analyses were performed on the diastereomeric transition states using AIMAII (version 19.10.12) to visualize bonding paths and identify bond critical points.28 CYLView was used to illustrate the optimized structures.29

**14. Probable Catalytic Dirhodium (II) Active Species**

All possible coordination modes of the ligand to identify the most stable species were considered. Our results showed that Type II complexes were energetically more stable than complexes featuring monocoordination of the ligand at the dirhodium (II) core. Among the Type II complexes, **A9**, in which one of the bridging carboxylate ligands dissociates resulting in a κ¹ fashion coordination, with a base occupying the axial position is stabilized by 48.5 kcal mol⁻¹ relative to **A1**as shown in Figure S1. Since diaxial coordination blocks the reactive site, **A9** is most likely the resting state of the catalyst. The catalytic cycle progresses by dissociation of one of the ligands upon substrate coordination.

**
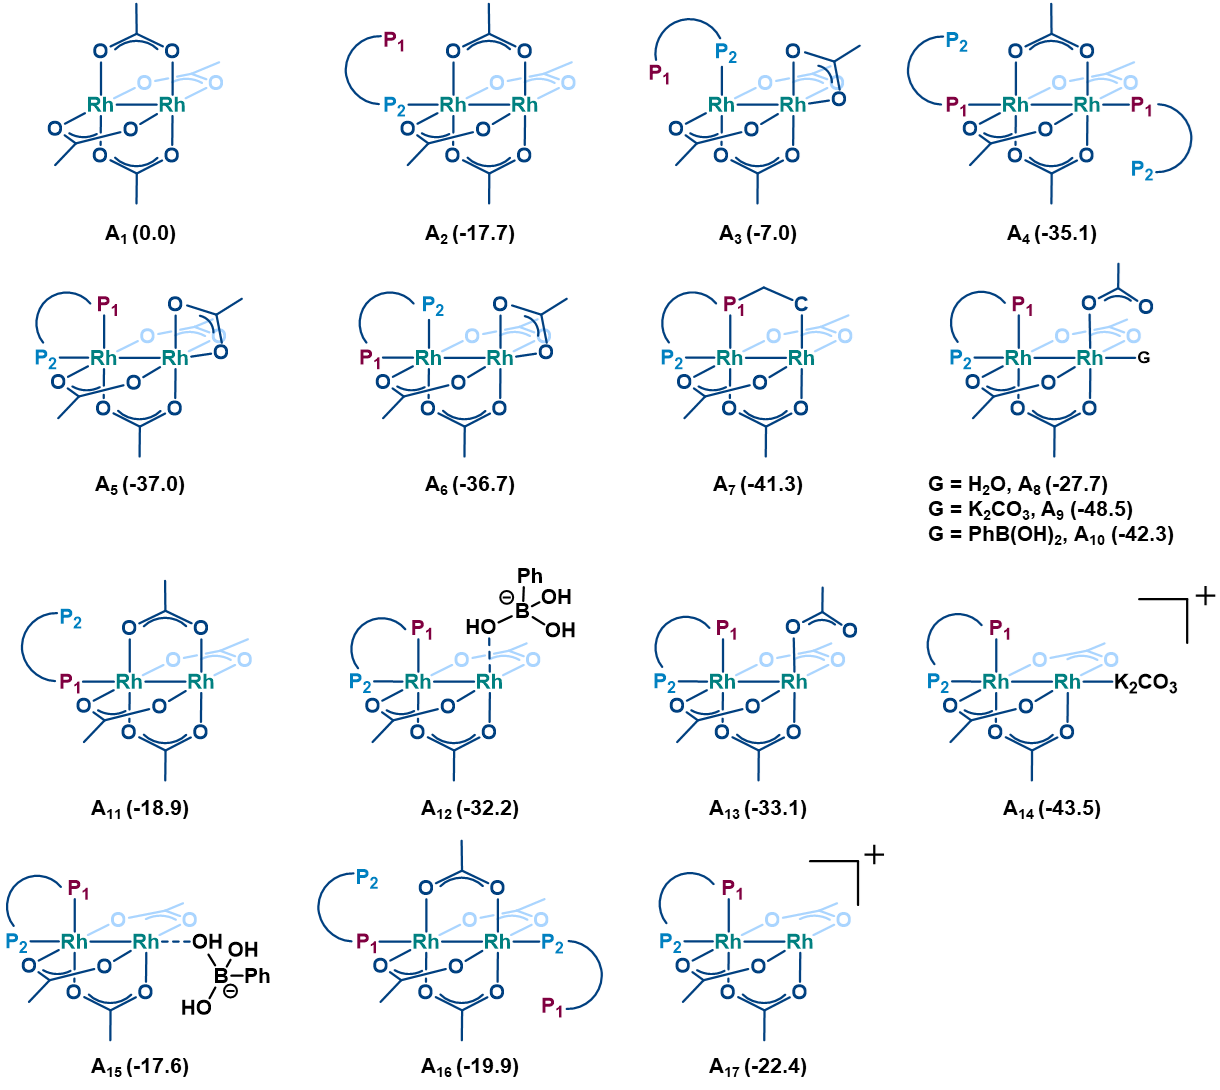
**

**Figure S23.** Possible catalytic active species. The relative free energies (kcal mol−1) are given at the SMD(toluene:water)/B3LYP-D3(BJ)/6-311++G(d,p),SDD(Rh,Fe)//B3LYP-D3(BJ)/6-31G(d,p),SDD(Rh, Fe) level of theory with relative to **A1**.

**15. Additional DFT calculations**

To identify the most stable transmetalated intermediate, all possible structures were evaluated. Among them, intermediate E with only the substrate coordinated to the metal center (without any additional ligand coordination) was found to be the most stable, with a relative free energy of −27.2 kcal mol⁻¹ with respect to complex B.

**
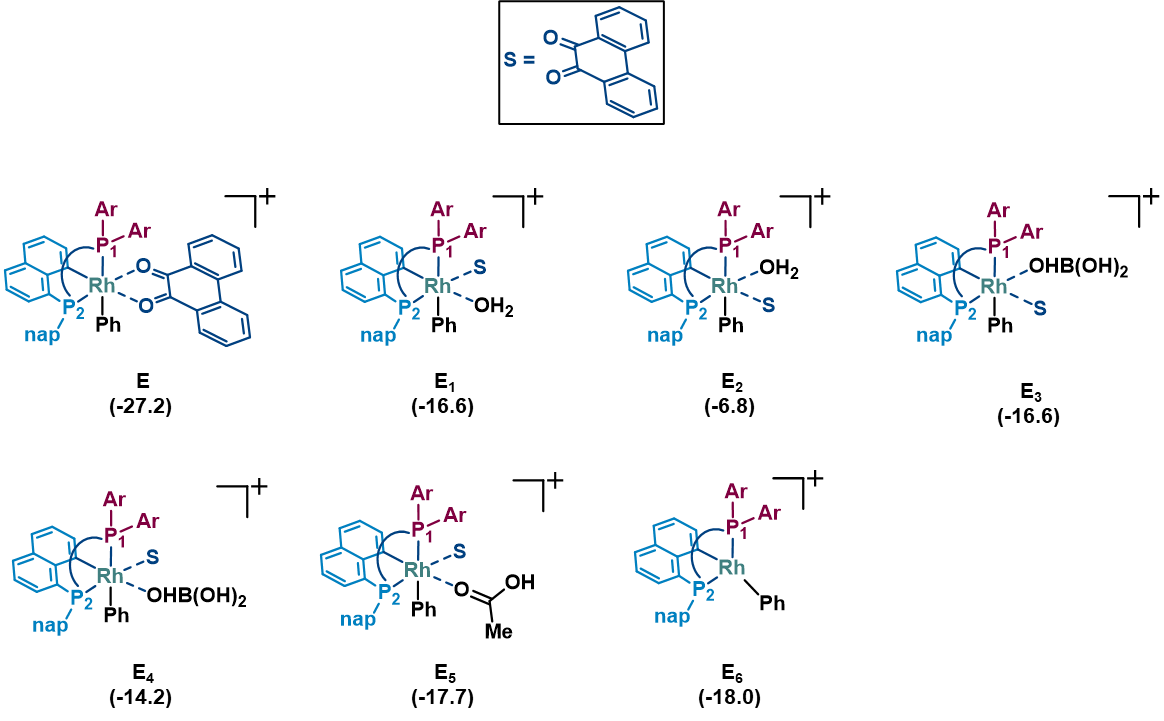
**

**Figure S24.** Possible transmetalated complex. The relative free energies (kcal mol−1) are given at the SMD(toluene:water)/B3LYP-D3(BJ)/6-311++G(d,p),SDD(Rh,Fe)//B3LYP-D3(BJ)/6-31G(d,p),SDD(Rh, Fe) level of theory with relative to **B**.

Alternative transition states were also located and evaluated computationally. All of them were found to be higher in energy than **TS(E-FS)**. The located transition states are summarized as follows:

**TS(E-GS):** water and substrate coordination to Rh center

**TS(E-HS):** boronic acid and substrate coordinated to Rh center

**TS(E-IS):** only substrate is coordinated through H-bonding interactions with boronic acid

**TS(E-GS):** acetic acid and substrate coordinated to Rh center


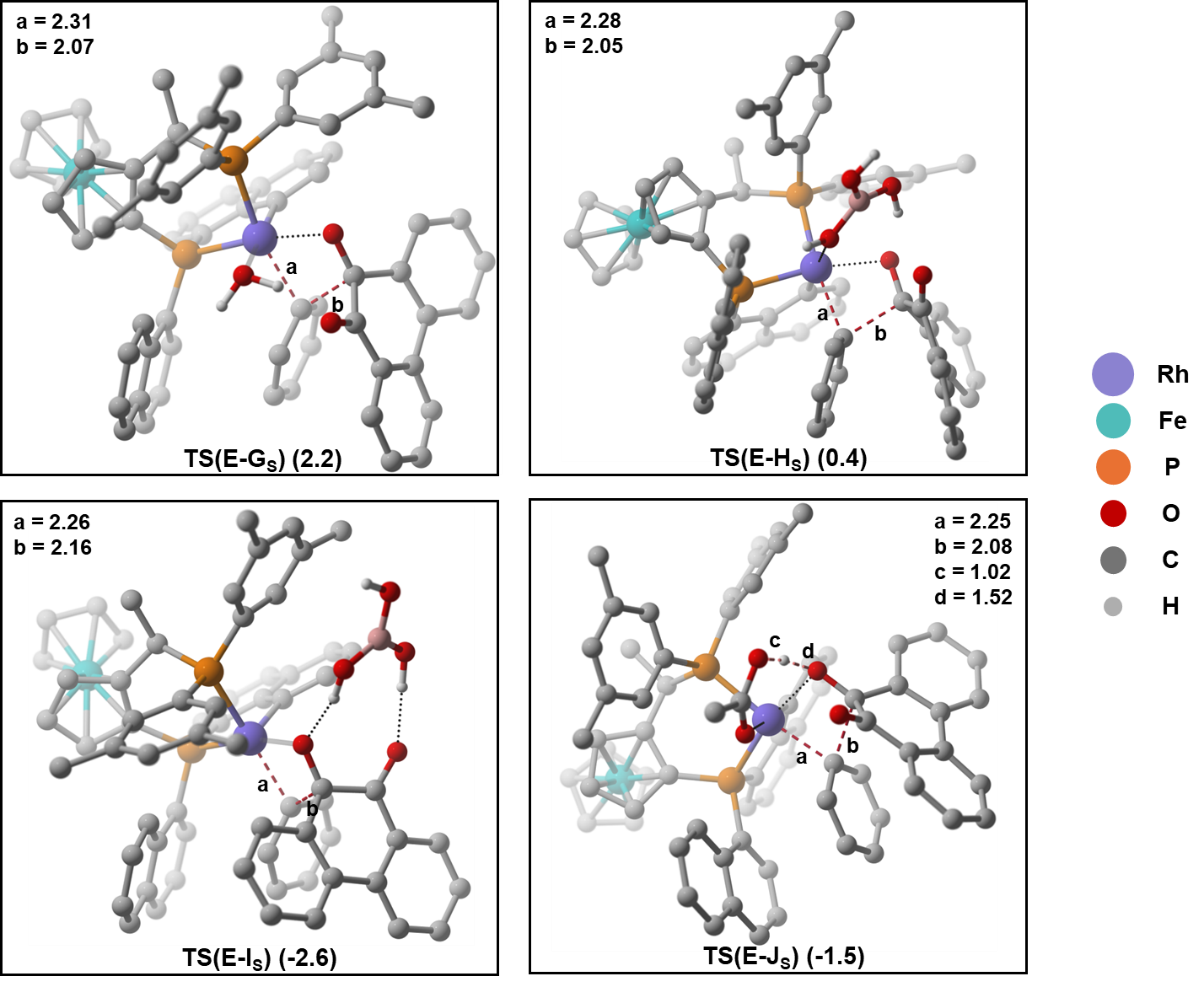


**Figure S25.** Competing Transition-State Pathways for Formation of the Major S Enantiomeric Product. Hydrogen atoms are omitted in the CYL view images for clarity, except those of the boronic acid and acetic acid. The relative free energies (kcal mol−1) are given at the SMD(toluene: water)/B3LYP-D3(BJ)/6-311++G(d,p),SDD(Rh,Fe)//B3LYP-D3(BJ)/6-31G(d,p),SDD(Rh,Fe) level of theory with relative to **B**.

**16. Conformational sampling of diastereomeric TSs: TS(E-FS) and TS(E-FR)**

Due to the rigid structure of the **X1** complex, fewer conformations are possible; therefore, manual conformational sampling was performed to identify the most stable diastereomeric transition state for both TS, as listed below.

**Table S5.** Totalelectronic energies (a.u.) and relative free energies (kcal mol⁻¹) computed at the SMD(toluene: water)/B3LYP-D3(BJ)/6-311++G(d,p),SDD(Rh,Fe)//B3LYP-D3(BJ)/6-31G(d,p), SDD (Rh, Fe) level of theory. Gibbs free energies are reported relative to **B**.

| Conformers | ∆E (a.u.) | ∆G (kcal/mol) | Conformers | ∆E (a.u.) | ∆G (kcal/mol) |
| --- | --- | --- | --- | --- | --- |
| TS(E-FS) | -3693.778532 | -6.2 | **TS(E-FR)** | -3693.77497 | -5.8 |
| TS(E-FS)-1 | -3693.774779 | -3.9 | **TS(E-FR)-1** | -3693.82789 | -1.8 |
| TS(E-FS)-2 | -3693.769505 | -2.0 | **TS(E-FR)-2** | -3693.77034 | -1.2 |
|  |  |  | **TS(E-FR)-3** | -3693.76589 | -0.7 |

**17. Activation Strain Analysis (ASA)**

To understand the origin of enantioselectivity, we performed ASA using a fragmentation-based approach. To quantify the distortion and interaction energies, the transition state was dissected into two fragments: phenanthrene-9,10-dione and the Rh complex. These fragments were then subjected to single-point calculations. The interaction energy was computed as the difference between the total electronic energy of the transition state and the sum of the electronic energies of its fragments.The distortion energy differences were obtained by comparing the fragment energies between the two diastereomeric transition states. As given in Table S7, ASA reveals that the interaction energy in **TS(E-FS)** is 8.5 kcal mol⁻¹ greater than in **TS(E-FR)** (Table S7). Although **TS(E-FS)** exhibits a 2.3 kcal mol⁻¹ greater distortion energy compared to **TS(E-FR),** the stronger interaction between the fragments in **TS(E-FS)** compensates for this distortion, resulting in the major product (*S* enantiomer).

The interaction energies were calculated using the following expressions:

∆Eint in TS(E-FS) = E1 – (E1-1 + E1-2)

∆Eint in TS(E-FR) = E2 – (E2-1 + E2-2)

Here, **E1** and **E2** are the electronic energies of **TS(E-FS)** and **TS(E-FR)**, and **E1-1**, **E1-2**, **E2-1**, and **E2-2**represent the energies of the phenanthrene-9,10-dione and Rh complex fragments from their corresponding transition states.


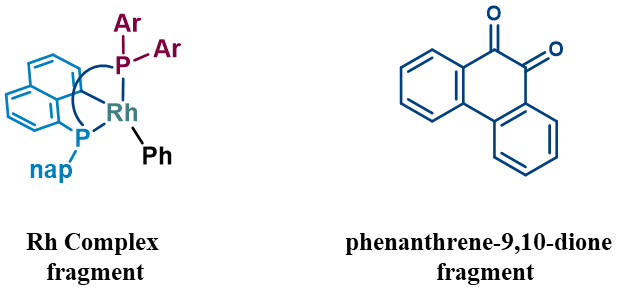


**Table S6.** Total electronic energy (∆E) in a.u. of both diastereomeric TSs and their fragments at the PCM(toluene: water)/DLPNO-CCSD(T)/def2-TZVP//B3LYP-D3(BJ)/6-31G(d,p),SDD(Rh, Fe) level of theory.

| **TS(E-FS) (1)** | | **TS(E-FR) (2)** | |
| --- | --- | --- | --- |
| -4825.1389 | | -4825.1292 | |
| phenanthrene-9,10-dione **(1-1)** | Rh complex **(1-2)** | phenanthrene-9,10-dione **(2-1)** | Rh complex **(2-2)** |
| -687.5256 | -4137.5156 | -687.5264 | -4137.5185 |

**Table S7.**

| **TSs** | **Distortion Energy**  **(kcal mol-1)** | | **Interaction Energy**  **(kcal mol-1)** |
| --- | --- | --- | --- |
|  | phenanthrene-9,10-dione | Rh complex |  |
| **TS(E-FS)** | 0.5 | 1.8 | -61.2 |
| **TS(E-FR)** | 0.0 | 0.0 | -52.7 |

**Table S8.** Approximate strength of important noncovalent interactions in the lowest energy TSs **TS(E-FS)** and **TS(E-FR)**

| **TS(E-FS)** | | | | | |
| --- | --- | --- | --- | --- | --- |
| **NCIs** | **ρ** | **∆2ρ** | **G** | **V=1/4∆2ρ-2G** | **E=1/2(V)**  **(kcal/mol)** |
| **1** | 0.00767 | 0.02987 | 0.00614 | -0.00481 | -1.5 |
| **2** | 0.01222 | 0.04678 | 0.01000 | -0.00830 | -5.2 |
| **3** | 0.01018 | 0.04237 | 0.00868 | -0.00678 | -4.3 |
| **4** | 0.00961 | 0.03653 | 0.00764 | -0.00616 | -3.9 |

| **TS(E-FR)** | | | | | |
| --- | --- | --- | --- | --- | --- |
| **NCIs** | **Ρ** | **∆2ρ** | **G** | **V=1/4∆2ρ-2G** | **E=1/2(V)**  **(kcal/mol)** |
| **1** | 0.00956 | 0.03156 | 0.00677 | -0.00565 | -3.5 |
| **2** | 0.01019 | 0.03796 | 0.00817 | -0.00685 | -4.3 |
| **3** | 0.01027 | 0.04037 | 0.00839 | -0.00669 | -4.2 |

**18. Benchmarks Studies**

**BS1 =** B3LYP-D3(BJ)/6-31G(d,p), SDD (Rh, Fe)

**BS2** = B3LYP-D3(BJ)/6-311++G(d,p), SDD (Rh, Fe) (given in table S8)

**BS3** = M06-D3/def-2TZVP

**BS4** = M06-D3/6-311++G(d,p), SDD (Rh, Fe)

**BS5** = PBE1PBE/def-2TZVP

**BS6** = PBE1PBE/6-311++G(d,p), SDD (Rh, Fe)

**BS7** = DLPNO-CCSD(T)/def2-TZVP (used only for diastereomeric TSs)

**Table S9.** Total electronic energies (∆E) in a.u. of the key stationary points at the different level of theories.

|  | SMD(Toluene: water)  /BS3//BS1 | SMD(Toluene: water)  /BS4//BS1 | SMD(Toluene: water)  /BS5//BS1 | SMD(Toluene: water)  /BS6//BS1 | PCM(Toluene: water)  /BS7//BS1 |
| --- | --- | --- | --- | --- | --- |
| **B** | -4139.6481 | -2999.6163 | -4138.4730 | -2998.5572 | -4135.5511 |
| **C** | -4395.1768 | -3255.1270 | -4393.8865 | -3253.9506 | -4389.7208 |
| **TS(C-D)** | -4395.1698 | -3255.1198 | -4393.8794 | -3253.9432 | -4389.7149 |
| **D** | -4395.2128 | -3255.1623 | -4393.9198 | -3253.9829 | -4389.7513 |
| **E** | -4831.2730 | -3691.1722 | -4829.8410 | -3689.8574 | -4825.1672 |
| **TS(E-FS)** | -4831.2388 | -3691.1376 | -4829.8102 | -3689.8260 | -4825.1389 |
| **FS** | -4831.2764 | -3691.1751 | -4829.8501 | -3689.8657 | -4825.1792 |
| **PhB(OH)3 ̶** | -484.1097 | -484.0668 | -483.8696 | -483.8222 | -483.444 |
| **Substrate** | -688.5357 | -688.4586 | -688.2384 | -688.1619 | -687.5468 |
| **CH3COO ̶** | -228.5682 | -228.5502 | -228.4434 | -228.4239 | -228.2714 |
| **PhB(OH)2** | -252.4912 | -252.4660 | -252.3350 | -252.3061 | -252.1601 |

**Table S10.** Relative free energies (∆G) in kcal/mol (a.u.) of the key stationary points at the different level of theories.

|  | SMD(Toluene: water)  /BS3//BS1 | SMD(Toluene: water)  /BS4//BS1 | SMD(Toluene: water)  /BS5//BS1 | SMD(Toluene: water)  /BS6//BS1 | PCM(Toluene: water)  /BS7//BS1 |
| --- | --- | --- | --- | --- | --- |
| **B** | 0.0 | 0.0 | 0.0 | 0.0 | 0.0 |
| **C** | 11.4 | 7.1 | 11.4 | 6.5 | 5.1 |
| **TS(C-D)** | 16.0 | 11.7 | 16.0 | 11.3 | 9.0 |
| **D** | -11.3 | -15.2 | -9.7 | -13.8 | -14.1 |
| **E** | -17.8 | -22.7 | -17.4 | -22.2 | -29.1 |
| **`TS(E-FS)** | 3.4 | -1.2 | 1.7 | -2.7 | -11.5 |
| **FS** | -18.4 | -23.0 | -21.6 | -26.0 | -35.1 |

**19. Electronic Energies of all the Stationary Points**

**Table S11.** Toal Electronic energies (∆E) of all stationary points at SMD(toluene: water)/B3LYP-D3(BJ)/6-311++G(d,p),SDD(Rh, Fe)//B3LYP-D3(BJ)/6-31G(d,p),SDD(Rh, Fe) level of theory.

| **species** | **∆E (a.u.)** |
| --- | --- |
| **L(Josiphos)** | -2663.089366 |
| **K2CO3** | -1463.93074287 |
| **PhB(OH)2** | -252.5933451 |
| **PhB(OH)3 ̶** | -484.4111989 |
| **H2O** | -76.4648446958 |
| **CH3COO ̶** | -228.690380401 |
| **CH3COOH** | -229.1785734 |
| **A1** | -1135.63794535 |
| **A2** | -3798.78386736 |
| **A3** | -3798.76481818 |
| **A4** | -6461.92931081 |
| **A5** | -3798.81496323 |
| **A6** | -3798.81466642 |
| **A7** | -3569.62339398 |
| **A8** | -3875.28784288 |
| **A9** | -5262.78974703 |
| **A10** | -4207.27930130 |
| **A11** | -3798.78571379 |
| **A12** | -4054.53443953 |
| **A13** | -3798.81335220 |
| **A14** | -5034.06763012 |
| **A15** | -4054.51097102 |
| **A16** | -6461.90232128 |
| **A17** | -3570.07938902 |
| **B** | -3001.623644 |
| **C** | -3257.345097 |
| **C’** | -3410.083138 |
| **C’’** | -3410.062128 |
| **D** | -3257.378073 |
| **D’** | -3410.083018 |
| **D’’** | -3410.07495 |
| **E** | -3693.81236361 |
| **E1** | -3770.28169287 |
| **E2** | -3770.26366828 |
| **E3** | -3946.414594 |
| **E4** | -3946.405943 |
| **E5** | -3922.99858018 |
| **E6** | -3004.755997 |
| **TS(C-D)** | -3257.335797 |
| **TS(C’-D’)** | -3410.060229 |
| **TS(C’’-D’’)** | -3410.044684 |
| **TS(E-GS)** | -3770.25296 |
| **TS(E-HS)** | -3946.3889 |
| **TS(E-IS)** | -3946.39081 |
| **TS(E-JS)** | -3922.97652 |
| **TS(E-FS)** | -3693.778532 |
| **FS** | -3693.8157 |

**20. References**

1. Shi, L.; Xue, X.; Hong, B.; Li, Q.; Gu, Z. Dirhodium(II)/Phosphine Catalyst with Chiral Environment at Bridging Site and Its Application in Enantioselective Atropisomer Synthesis. *ACS Cent. Sci.* **2023**, *9* (4), 748–755.
2. Yang, L.; Wu, X.; Lu, W.; Lu, Y.; Zhang, Z. Dirhodium(II)/DPPM Catalyzed 1,2-Hydrosilylation of Conjugated Dienes with Tertiary Silanes. *Org. Lett.* **2024**, *26* (11), 2287–2291.
3. Lu, W. K.; Zhu, X. Y.; Yang, L. Q.; Wu, X. Y.; Xie, X. M.; Zhang, Z. G. Distinct Catalytic Performance of Dirhodium(II) Complexes with *ortho*-Metalated DPPP in Dehydrosilylation of Styrene Derivatives with Alkoxysilanes. *ACS Catal.* **2021**, *11*, 10190– 10197.
4. Lu, B.; Liang, X.; Zhang, J.; Wang, Z.; Peng, Q.; Wang, X. Dirhodium(II)/Xantphos-Catalyzed Relay Carbene Insertion and Allylic Alkylation Process: Reaction Development and Mechanistic Insights. *J. Am. Chem. Soc.* **2021**, *143* (30), 11799–11810.
5. Lahuerta, P.; Paya, J.; Solans, X.; Ubeda, M. A. Ortho-Metalation Reactions in Binuclear Dirhodium Compounds. Molecular Structure and Reactivity of a Monometalated Compound with the Phosphine P(*o*-ClC6H4)(C6H5)2. *Inorg. Chem.* **1992**, *31*, 385–391.
6. Lloret, J.; Estevan, F.; Lahuerta, P.; Hirva, P.; Pérez-Prieto, J.; Sanaú, M. Dirhodium(II) Compounds with Bridging Thienylphosphines: Studies on Reversible P,C/P,S Coordination *Chem. - Eur. J*. **2009**, *15*, 7706– 7716.
7. Estevan, F.; Lahuerta, P.; Pérez-Prieto, J.; Sanaú, M.; Stiriba, S.-E.; Ubeda, M. A. Ligand Effects on the Chemoselectivity of Ortho-Metalated Rhodium(II) Catalyzed α-Diazo Ketone Transformations. *Organometallics* **1997**, *16*, 880–886.
8. Sheldrick, G., SHELXT - Integrated space-group and crystal-structure determination. Acta Crystallographica Section A **2015**, *71*, 3-8.
9. Sheldrick, G., Crystal structure refinement with SHELXL. Acta Crystallographica Section C **2015**, *71*, 3-8.
10. Llunell, M.; Casanova, D.; Cirera, J.; Alemany, P.; Alvarez, S. J. U. d. B., Barcelona, Spain, SHAPE, version 2.1. **2013**, 2103.
11. Gaussian 16, Revision C.01, Frisch, M. J.; Trucks, G. W.; Schle-gel, H. B.; Scuseria, G. E.; Robb, M. A.; Cheeseman, J. R.; Scal-mani, G.; Barone, V.; Petersson, G. A.; Nakatsuji, H.; Li, X.; Caricato, M.; Marenich, A. V.; Bloino, J.; Janesko, B. G.; Gom-perts, R.; Mennucci, B.; Hratchian, H. P.; Ortiz, J. V.; Izmaylov, A. F.; Sonnenberg, J. L.; Williams-Young, D.; Ding, F.; Lippa-rini, F.; Egidi, F.; Goings, J.; Peng, B.; Petrone, A.; Henderson, T.; Ranasinghe, D.; Zakrzewski, V. G.; Gao, J.; Rega, N.; Zheng, G.; Liang, W.; Hada, M.; Ehara, M.; Toyota, K.; Fukuda, R.; Ha-segawa, J.; Ishida, M.; Nakajima, T.; Honda, Y.; Kitao, O.; Nakai, H.; Vreven, T.; Throssell, K.; Montgomery, J. A., Jr.; Peralta, J. E.; Ogliaro, F.; Bearpark, M. J.; Heyd, J. J.; Brothers, E. N.; Kudin, K. N.; Staroverov, V. N.; Keith, T. A.; Kobayashi, R.; Normand, J.; Raghavachari, K.; Rendell, A. P.; Burant, J. C.; Iyengar, S. S.; Tomasi, J.; Cossi, M.; Millam, J. M.; Klene, M.; Adamo, C.; Cammi, R.; Ochterski, J. W.; Martin, R. L.; Morokuma, K.; Farkas, O.; Foresman, J. B.; Fox, D. J. Gaussian, Inc., Wallingford CT, **2016**.
12. Grimme, S.; Antony, J.; Ehrlich, S.; Krieg, H. A Consistent and Accurate Ab Initio Parametrization of Density Functional Dispersion Correction (DFT-D) for the 94 Elements H-Pu. *J. Chem. Phys.* **2010**, *132*, 154104.
13. Becke, A. D. Density‐functional Thermochemistry. III. The Role of Exact Exchange. *J. Chem. Phys.* **1993**, *98* (7), 5648–5652.
14. Lee, C.; Yang, W.; Parr, R. G. Development of the Colle-Salvetti Correlation-Energy Formula into a Functional of the Electron Density. *Phys. Rev. B* **1988**, *37*, 785–789.
15. Hay, P. J.; Wadt, W. R. Ab Initio Effective Core Potentials for Molecular Calculations. Potentials for K to Au Including the Outermost Core Orbitals. *J. Chem. Phys.* **1985**, *82*, 299–310.
16. Dolg, M.; Wedig, U.; Stoll, H.; Preuss, H. Energy‐adjusted Ab Initio Pseudopotentials for the First Row Transition Elements. *J. Chem. Phys.* **1987**, *86*, 866–872.
17. Gonzalez, C.; Schlegel, H. B. An Improved Algorithm for Reaction Path Following. *J. Chem. Phys.* **1989**, *90*, 2154–2161.
18. Fukui, K. The Path of Chemical Reactions - the IRC Approach. *Acc. Chem. Res.* **1981**, *14*, 363–36.
19. Marenich, A. V.; Cramer, C. J.; Truhlar, D. G. Universal Solvation Model Based on Solute Electron Density and on a Continuum Model of the Solvent Defined by the Bulk Dielectric Constant and Atomic Surface Tensions. *J. Phys. Chem. B* **2009**, *113*, 6378–639.
20. P. Winget, D. M. Dolney, D. J. Giesen, C. J. Cramer, D. G. Truhlar. Minnesota Solvent Descriptor Database, version **2010**. University of Minnesota: Minneapolis, MN.
21. Riplinger, C.; Neese, F. An efficient and near linear scaling pair natural orbital based local coupled cluster method. *J. Chem. Phys.* **2013**, *138*, 034106.
22. Weigend, F.; Ahlrichs, R. Balanced basis sets of split valence, triple zeta valence and quadruple zeta valence quality for H to Rn: Design and assessment of accuracy. *Phys. Chem. Chem. Phys.* **2005**, *7*, 3297– 3305.
23. Tomasi, J.; Mennucci, B.; Cammi, R. Chem. Rev. **2005**, *105*, 2999-3094.
24. Zhao, Y.; Truhlar, D. The M06 suite of density functionals for main group thermochemistry, thermochemical kinetics, noncovalent interactions, excited states, and transition elements: two new functionals and systematic testing of four M06-class functionals and 12 other functionals. *Theor. Chem. Acc.* **2008**, *120*, 215– 241.
25. Perdew, J. P.; Burke, K.; Ernzerhof, M. Generalized Gradient Approximation Made Simple. *Phys. Rev. Lett.* **1996**, *77*, 3865– 3868.
26. Perdew, J. P.; Burke, K.; Ernzerhof, M. Generalized Gradient Approximation Made Simple [Phys. Rev. Lett. 77, 3865 (1996)] Phys. Rev. Lett. **1997**, 78, 1396– 1396.
27. Adamo, C.; Barone, V. Toward reliable density functional methods without adjustable parameters: The PBE0 model J. Chem. Phys. **1999**, 110, 6158– 6170.
28. AIMAll (Version 19.10.12), Todd A. Keith, TK Gristmill Software, Overland Park KS, USA, **2019**.
29. Legault, C. Y. *CYLview, 1.0b*; Université de Sherbrooke: **2009.**

**21. Cartesian Coordinates of all Optimized Geometries**

----------------------------------------------------------------------------------------------------------------

**K2CO3**

----------------------------------------------------------------------------------------------------------------

Number of imaginary frequencies: 0

Electronic energy: HF=-1463.7007749

Zero-point correction = 0.016688 (Hartree/Particle)

Thermal correction to Energy = 0.023368

Thermal correction to Enthalpy = 0.024312

Thermal correction to Gibbs Free Energy = -0.016326

Sum of electronic and zero-point Energies = -1463.684087

Sum of electronic and thermal Energies = -1463.677407

Sum of electronic and thermal Enthalpies = -1463.676463

Sum of electronic and thermal Free Energies = -1463.717101

......................................................................................................................................................

Cartesian Coordinates

......................................................................................................................................................

6 -0.000262 0.803567 0.000616

8 -0.000345 -0.548546 0.000895

8 1.127303 1.414502 0.018638

8 -1.127220 1.415234 -0.018979

19 2.475823 -0.607048 -0.003820

19 -2.475630 -0.607211 0.003392

----------------------------------------------------------------------------------------------------------------

**CH3COO ̶**

----------------------------------------------------------------------------------------------------------------

Number of imaginary frequencies: 0

Electronic energy: HF = -228.5036264

Zero-point correction = 0.048100 (Hartree/Particle)

Thermal correction to Energy = 0.052589

Thermal correction to Enthalpy = 0.053534

Thermal correction to Gibbs Free Energy = 0.020120

Sum of electronic and zero-point Energies = -228.455526

Sum of electronic and thermal Energies = -228.451037

Sum of electronic and thermal Enthalpies = -228.450093

Sum of electronic and thermal Free Energies = -228.483507

......................................................................................................................................................

Cartesian Coordinates

......................................................................................................................................................

8 0.805088 -1.110289 -0.000167

6 0.220276 0.001713 0.000002

8 0.697686 1.165237 -0.000092

6 -1.353051 -0.053013 0.000025

1 -1.732288 -1.081680 -0.008864

1 -1.745951 0.466605 0.884928

1 -1.747302 0.483293 -0.874150

----------------------------------------------------------------------------------------------------------------

**CH3COOH**

----------------------------------------------------------------------------------------------------------------

Number of imaginary frequencies: 0

Electronic energy: HF=-229.0944138

Zero-point correction = 0.062036 (Hartree/Particle)

Thermal correction to Energy = 0.066590

Thermal correction to Enthalpy = 0.067534

Thermal correction to Gibbs Free Energy = 0.034886

Sum of electronic and zero-point Energies = -229.032378

Sum of electronic and thermal Energies = -229.027824

Sum of electronic and thermal Enthalpies = -229.026879

Sum of electronic and thermal Free Energies = -229.059528

......................................................................................................................................................

Cartesian Coordinates

......................................................................................................................................................

6 -0.092302 0.125138 0.000007

6 1.396211 -0.109856 0.000011

1 1.914992 0.847599 -0.000166

1 1.681174 -0.691819 0.881246

1 1.681117 -0.691956 -0.881192

8 -0.644661 1.202007 0.000005

8 -0.778048 -1.046031 0.000008

1 -1.719074 -0.803329 -0.000099

----------------------------------------------------------------------------------------------------------------

**PhB(OH)2**

----------------------------------------------------------------------------------------------------------------

Number of imaginary frequencies: 0

Electronic energy: HF = -252.4862696

Zero-point correction = 0.048655 (Hartree/Particle)

Thermal correction to Energy = 0.053236

Thermal correction to Enthalpy = 0.054181

Thermal correction to Gibbs Free Energy = 0.022039

Sum of electronic and zero-point Energies = -252.437614

Sum of electronic and thermal Energies = -252.433033

Sum of electronic and thermal Enthalpies = -252.432089

Sum of electronic and thermal Free Energies = -252.464230

......................................................................................................................................................

Cartesian Coordinates

......................................................................................................................................................

5 -0.008788 -0.032123 -0.000019

8 1.087026 -0.857775 -0.000109

1 1.932939 -0.401749 0.000610

8 -1.231143 -0.639078 0.000114

1 -1.937601 0.015773 -0.000924

8 0.035397 1.348931 0.000175

1 0.918359 1.729972 -0.001037

----------------------------------------------------------------------------------------------------------------

**PhB(OH)3 ̶**

----------------------------------------------------------------------------------------------------------------

Number of imaginary frequencies: 0

Electronic energy: HF = -484.1650157

Zero-point correction = 0.136490 (Hartree/Particle)

Thermal correction to Energy = 0.146583

Thermal correction to Enthalpy = 0.147527

Thermal correction to Gibbs Free Energy = 0.100795

Sum of electronic and zero-point Energies = -484.028526

Sum of electronic and thermal Energies = -484.018432

Sum of electronic and thermal Enthalpies = -484.017488

Sum of electronic and thermal Free Energies = -484.064221

......................................................................................................................................................

Cartesian Coordinates

......................................................................................................................................................

5 1.574822 0.011879 -0.034644

6 -0.072462 0.009505 -0.068485

6 -0.832862 1.192582 -0.025133

6 -0.801705 -1.191867 -0.075019

6 -2.229749 1.184294 0.025180

1 -0.304388 2.144223 -0.049604

6 -2.197347 -1.222771 -0.025837

1 -0.236252 -2.119605 -0.137380

6 -2.923184 -0.029155 0.029280

1 -2.782979 2.123276 0.055350

1 -2.725693 -2.176435 -0.034656

1 -4.011392 -0.044350 0.066826

8 2.006316 1.160985 -0.848038

1 2.965180 1.064385 -0.901861

8 2.038268 0.107558 1.388633

8 2.144964 -1.253639 -0.540622

1 2.431672 -1.716115 0.254524

1 1.617207 0.890472 1.760324

----------------------------------------------------------------------------------------------------------------

**L(Josiphos)**

----------------------------------------------------------------------------------------------------------------

Number of imaginary frequencies: 0

Electronic energy: HF = -2662.5915546

Zero-point correction = 0.779029 (Hartree/Particle)

Thermal correction to Energy = 0.825641

Thermal correction to Enthalpy = 0.826585

Thermal correction to Gibbs Free Energy = 0.697667

Sum of electronic and zero-point Energies = -2661.812526

Sum of electronic and thermal Energies = -2661.765914

Sum of electronic and thermal Enthalpies = -2661.764969

Sum of electronic and thermal Free Energies = -2661.893888

......................................................................................................................................................

Cartesian Coordinates

......................................................................................................................................................

26 1.962136 2.743455 0.221125

6 2.401346 1.305215 -1.172380

6 2.206052 2.562887 -1.809599

6 0.880489 2.995567 -1.521827

6 0.235270 1.996923 -0.725991

6 1.186440 0.938242 -0.497377

15 0.888416 -0.774213 0.074035

6 2.559226 -1.197572 0.762699

6 2.891840 -1.004364 2.090453

6 4.185820 -1.297238 2.578466

6 5.154228 -1.781175 1.730862

6 4.858435 -2.025578 0.364981

6 5.839300 -2.540184 -0.524920

6 5.537908 -2.791344 -1.843105

6 4.230321 -2.548149 -2.326539

6 3.258241 -2.045753 -1.491657

6 3.538211 -1.753960 -0.127673

1 2.253155 -1.881423 -1.863505

1 3.989847 -2.764670 -3.362891

1 6.297237 -3.184599 -2.512286

1 6.836602 -2.735148 -0.139636

1 6.155475 -1.993986 2.095604

1 4.410621 -1.127215 3.627365

1 2.147379 -0.618489 2.777083

6 -0.117184 -0.672091 1.618133

6 -0.193209 0.465529 2.401177

6 -0.971643 0.504747 3.579841

6 -1.659778 -0.612430 3.990929

6 -1.624041 -1.804826 3.222179

6 -2.344611 -2.961009 3.623932

6 -2.339785 -4.100905 2.854451

6 -1.613113 -4.128733 1.640414

6 -0.894906 -3.028997 1.228629

6 -0.864577 -1.837013 2.004636

1 -0.358015 -3.050317 0.287393

1 -1.625401 -5.023800 1.026141

1 -2.898465 -4.976631 3.170377

1 -2.911408 -2.921875 4.550191

1 -2.245700 -0.598647 4.906011

1 -1.009534 1.419327 4.164463

1 0.353447 1.345627 2.093462

6 -1.211600 2.003769 -0.339938

6 -1.716512 3.356840 0.173672

1 -1.597552 4.142235 -0.578536

1 -1.158614 3.654630 1.065722

1 -2.778069 3.298153 0.431071

1 -1.370230 1.258996 0.435923

15 -2.285575 1.509596 -1.832421

6 -3.804643 0.943758 -0.946730

6 -3.795617 0.199631 0.241049

6 -4.990562 -0.185269 0.861695

6 -6.201839 0.188461 0.272403

6 -6.246280 0.929192 -0.914302

6 -5.038047 1.304174 -1.508585

1 -5.050835 1.891834 -2.423066

6 -7.568063 1.295283 -1.544479

1 -8.318593 1.540187 -0.786425

1 -7.466129 2.154512 -2.213166

1 -7.966131 0.463059 -2.138075

1 -7.134506 -0.102349 0.751412

6 -4.959598 -0.989564 2.137636

1 -4.459584 -1.952026 1.988934

1 -5.968859 -1.184144 2.510744

1 -4.400099 -0.465458 2.919354

1 -2.856097 -0.102274 0.693792

6 -1.498303 -0.076225 -2.362437

6 -0.370695 0.035954 -3.187018

6 0.314501 -1.095154 -3.640195

6 -0.171681 -2.357049 -3.285201

6 -1.318547 -2.502532 -2.496256

6 -1.969115 -1.355042 -2.034428

1 -2.848623 -1.464406 -1.410017

6 -1.853253 -3.874005 -2.160904

1 -2.464137 -3.848727 -1.254832

1 -2.478920 -4.265938 -2.972322

1 -1.040829 -4.591399 -2.004141

1 0.348962 -3.245427 -3.636911

6 1.556979 -0.940048 -4.483657

1 2.378843 -0.515413 -3.896308

1 1.381805 -0.266292 -5.328973

1 1.891778 -1.901981 -4.882736

1 -0.006733 1.020900 -3.466340

1 0.435646 3.931050 -1.829866

1 2.953785 3.118773 -2.358292

1 3.314252 0.729695 -1.173330

6 3.675466 2.974444 1.354198

6 2.595672 2.583353 2.197646

6 1.570582 3.572547 2.091135

6 2.019004 4.576656 1.181840

6 3.321992 4.208964 0.729833

1 3.915944 4.746070 0.003459

1 1.456279 5.443267 0.864285

1 0.617308 3.560754 2.600364

1 2.554661 1.678336 2.783228

1 4.581163 2.409057 1.185681

----------------------------------------------------------------------------------------------------------------

**A1**

----------------------------------------------------------------------------------------------------------------

Number of imaginary frequencies: 0

Electronic energy: HF= -1135.3604063

Zero-point correction= 0.211272 (Hartree/Particle)

Thermal correction to Energy = 0.232733

Thermal correction to Enthalpy = 0.233677

Thermal correction to Gibbs Free Energy = 0.158558

Sum of electronic and zero-point Energies = -1135.149134

Sum of electronic and thermal Energies = -1135.127674

Sum of electronic and thermal Enthalpies = -1135.126729

Sum of electronic and thermal Free Energies = -1135.201849

......................................................................................................................................................

Cartesian Coordinates

......................................................................................................................................................

45 -0.000017 1.193507 0.000000

8 -1.450615 1.133962 1.450589

8 -1.450615 -1.133858 1.450615

6 -1.865542 0.000046 1.856988

6 -2.967090 0.000076 2.886006

1 -3.931296 0.000313 2.366590

1 -2.908820 0.898476 3.501703

1 -2.909110 -0.898501 3.501466

45 0.000017 -1.193507 0.000000

8 1.450615 -1.133962 1.450589

8 1.450615 1.133858 1.450615

6 1.865542 -0.000046 1.856988

6 2.967090 -0.000076 2.886006

1 3.931296 -0.000313 2.366590

1 2.908820 -0.898476 3.501703

1 2.909110 0.898501 3.501466

8 1.450615 -1.133962 -1.450589

8 1.450615 1.133858 -1.450615

6 1.865542 -0.000046 -1.856988

6 2.967090 -0.000076 -2.886006

1 3.931296 -0.000313 -2.366590

1 2.908820 -0.898476 -3.501703

1 2.909110 0.898501 -3.501466

8 -1.450615 1.133962 -1.450589

8 -1.450615 -1.133858 -1.450615

6 -1.865542 0.000046 -1.856988

6 -2.967090 0.000076 -2.886006

1 -3.931296 0.000313 -2.366590

1 -2.908820 0.898476 -3.501703

1 -2.909110 -0.898501 -3.501466

----------------------------------------------------------------------------------------------------------------

**A2**

----------------------------------------------------------------------------------------------------------------

Number of imaginary frequencies: 0

Electronic energy: HF = -3798.0237157

Zero-point correction = 0.993445 (Hartree/Particle)

Thermal correction to Energy = 1.062419

Thermal correction to Enthalpy = 1.063363

Thermal correction to Gibbs Free Energy = 0.885623

Sum of electronic and zero-point Energies = -3797.030271

Sum of electronic and thermal Energies = -3796.961297

Sum of electronic and thermal Enthalpies = -3796.960353

Sum of electronic and thermal Free Energies = -3797.138093

......................................................................................................................................................

Cartesian Coordinates

......................................................................................................................................................

45 -1.434326 -1.124656 -0.123115

45 -1.900691 -3.402062 -0.876312

26 1.120018 3.571863 -0.872776

15 3.095865 -0.433563 0.888137

15 -1.130581 1.194727 0.634494

8 0.256230 -1.868462 0.799158

8 -3.257214 -0.622572 -0.950653

8 -0.438118 -0.859606 -1.933214

8 -0.779750 -3.008450 -2.564680

8 -0.252391 -3.997772 0.203192

8 -3.561442 -2.675661 -1.861693

6 1.728377 1.803768 0.083461

6 2.821082 -2.606348 -0.941613

6 -1.378078 1.101750 2.456433

6 4.698465 -2.704238 0.566998

1 5.309844 -2.250903 1.342494

6 1.846806 3.927678 1.018262

1 2.224392 4.893856 1.323970

6 3.595680 -1.999724 0.053446

6 6.866417 1.140963 0.024594

6 2.171226 0.487490 -0.491797

1 1.285026 -0.124151 -0.657943

6 4.912490 1.335371 2.019076

1 4.148952 1.409908 2.789451

6 3.117235 -3.892951 -1.416069

6 -0.323551 -1.842889 -2.742220

6 4.709677 0.466275 0.941694

6 -3.893338 -1.468263 -1.664051

6 2.599739 2.895525 0.388430

1 3.651126 2.935939 0.149705

6 6.063843 2.128957 2.111025

6 5.704758 0.369777 -0.044033

1 5.573335 -0.320084 -0.871101

6 0.552753 3.368591 -2.862607

1 0.200898 2.449189 -3.304814

6 -2.660866 0.839425 3.047968

6 6.257935 3.061383 3.282192

1 7.066568 3.773644 3.096592

1 6.508696 2.505353 4.193504

1 5.345659 3.629245 3.492620

6 2.926031 0.630356 -1.817394

1 3.752031 1.339937 -1.734094

1 2.241419 0.990081 -2.589596

1 3.338747 -0.327606 -2.141537

6 1.932594 5.042417 -2.075418

1 2.818170 5.601145 -1.805441

6 -2.824766 2.476107 -1.300622

6 -2.277506 1.656561 -2.322776

1 -1.491960 0.955933 -2.083245

6 4.218230 -4.564164 -0.881990

1 4.453981 -5.564626 -1.237813

6 2.244459 -4.536893 -2.464201

1 2.568246 -5.559901 -2.673771

1 2.276645 -3.977606 -3.406271

1 1.199948 -4.561656 -2.142108

6 -2.905326 3.334780 0.972419

1 -2.580837 3.305188 2.005590

6 -4.354045 4.313760 -0.692603

1 -5.119276 5.026663 -0.987173

6 -1.563031 0.804772 5.256984

1 -1.644557 0.703280 6.335845

6 0.455837 -1.569533 -4.006262

1 0.082087 -0.658092 -4.480036

1 0.380099 -2.412184 -4.692802

1 1.505319 -1.398518 -3.748550

6 -5.150170 0.385394 4.331920

1 -6.110797 0.220955 4.810704

6 -4.007973 0.501214 5.087122

1 -4.050232 0.423778 6.170227

6 -0.340620 0.998663 4.660620

1 0.564143 1.046725 5.258643

6 0.588452 5.379968 -1.734113

1 0.275526 6.241635 -1.160667

6 -5.067391 0.462191 2.920521

1 -5.963933 0.337164 2.320624

6 -3.859622 0.677175 2.297687

1 -3.822806 0.688159 1.217131

6 -0.263523 4.350173 -2.222191

1 -1.332702 4.306065 -2.099583

6 -5.147380 -0.952254 -2.324775

1 -5.853076 -0.628757 -1.554011

1 -5.603310 -1.725094 -2.943180

1 -4.896830 -0.074734 -2.927437

6 -3.837994 3.423923 -1.669375

6 -3.744708 2.656303 -3.976788

1 -4.088573 2.712549 -5.005067

6 -3.884379 4.281077 0.598412

1 -4.271143 4.968940 1.343887

6 0.493726 3.503831 1.080590

1 -0.336451 4.072578 1.470052

6 0.405047 2.180750 0.517520

6 -2.385009 2.430655 0.062383

6 7.024349 2.023883 1.103054

1 7.921933 2.636458 1.159313

6 5.024515 -3.979123 0.105346

6 -0.251739 1.154363 3.260010

1 0.722940 1.312406 2.813599

6 7.940429 1.019973 -1.029367

1 8.325071 2.001920 -1.323719

1 7.563315 0.519685 -1.925405

1 8.792735 0.436876 -0.659862

6 1.908575 3.801658 -2.777896

1 2.773632 3.263152 -3.135410

6 0.403941 -3.136034 0.868102

6 1.421963 -3.662021 1.847241

1 2.098148 -4.354068 1.341705

1 0.888557 -4.214478 2.627565

1 1.984065 -2.843019 2.291629

6 6.227166 -4.714375 0.645112

1 5.995382 -5.765658 0.844532

1 6.586640 -4.262915 1.573800

1 7.055911 -4.697542 -0.073227

6 -2.743827 0.721052 4.474476

6 -2.722293 1.743811 -3.621607

1 -2.282407 1.104975 -4.382162

6 -4.286209 3.478792 -3.017586

1 -5.059105 4.197149 -3.276662

1 1.950027 -2.095388 -1.332025

8 -2.399648 -1.656639 1.609374

8 -3.017085 -3.689999 0.821021

6 -2.990806 -2.781202 1.707125

6 -3.705863 -3.033925 3.010079

1 -2.967753 -3.073995 3.816748

1 -4.258463 -3.972369 2.968534

1 -4.374327 -2.197170 3.225457

----------------------------------------------------------------------------------------------------------------

**A3**

----------------------------------------------------------------------------------------------------------------

Number of imaginary frequencies: 0

Electronic energy: HF = -3798.0041253

Zero-point correction = 0.992399 (Hartree/Particle)

Thermal correction to Energy =1.061990

Thermal correction to Enthalpy = 1.062934

Thermal correction to Gibbs Free Energy = 0.882618

Sum of electronic and zero-point Energies = -3797.011726

Sum of electronic and thermal Energies = -3796.942135

Sum of electronic and thermal Enthalpies = -3796.941191

Sum of electronic and thermal Free Energies = -3797.121507

......................................................................................................................................................

Cartesian Coordinates

...................................................................................................................................................... 45 2.022339 1.125471 0.841727

45 1.319035 2.384671 -1.154447

26 -0.826199 -3.322895 -1.346922

15 -2.894475 0.545200 0.703183

15 1.199531 -1.069073 0.748010

8 0.358724 1.848284 1.804879

8 3.755607 0.683855 -0.195720

8 0.389866 3.048930 -3.166076

8 0.289988 1.012087 -2.337426

8 -0.335710 2.944713 -0.057449

8 3.094438 1.828691 -2.043463

6 -1.569708 -1.687266 -0.247840

6 -3.116176 2.646408 -1.164675

6 1.028700 -1.183691 2.585791

6 -4.991561 2.403530 0.332219

1 -5.501069 1.873370 1.131859

6 -1.628286 -3.903093 0.456780

1 -1.974741 -4.910532 0.642040

6 -3.761213 1.930259 -0.144510

6 -6.299249 -1.855814 0.581337

6 -2.054705 -0.356322 -0.748295

1 -1.185975 0.262682 -0.976310

6 -4.090313 -1.411116 2.240242

1 -3.230600 -1.230918 2.880594

6 -3.679496 3.800002 -1.714751

6 0.007711 1.856979 -3.275371

6 -4.264658 -0.619241 1.101487

6 3.927385 1.141693 -1.372926

6 -2.398628 -2.842133 -0.094331

1 -3.438861 -2.901395 -0.375941

6 -4.982080 -2.444891 2.554652

6 -5.384628 -0.843409 0.284902

1 -5.543906 -0.219360 -0.588365

6 -0.195390 -2.895265 -3.279583

1 0.116906 -1.912073 -3.597407

6 2.054264 -0.623574 3.426571

6 -4.740150 -3.314794 3.763977

1 -5.557726 -4.023780 3.919223

1 -4.639373 -2.711929 4.673307

1 -3.813289 -3.890073 3.653973

6 -2.899116 -0.491708 -2.020805

1 -3.696676 -1.227955 -1.899590

1 -2.258231 -0.814652 -2.842743

1 -3.359516 0.457010 -2.297196

6 -1.508839 -4.709115 -2.720606

1 -2.372011 -5.336734 -2.546540

6 3.044721 -2.186073 -1.079862

6 2.498130 -1.340123 -2.079665

1 1.683727 -0.668024 -1.842741

6 -4.913947 4.241392 -1.223695

1 -5.360290 5.143237 -1.637727

6 -2.965424 4.540945 -2.819380

1 -3.034016 5.624422 -2.678852

1 -3.411703 4.315770 -3.796651

1 -1.907641 4.268403 -2.863117

6 3.116100 -3.075600 1.185981

1 2.745272 -3.090422 2.205180

6 4.662354 -3.937305 -0.461228

1 5.474585 -4.600071 -0.746937

6 0.493493 -0.771825 5.330974

1 0.287723 -0.594349 6.382953

6 -0.819714 1.392342 -4.443921

1 -0.562122 1.965461 -5.336078

1 -1.876109 1.567128 -4.214764

1 -0.680155 0.323958 -4.619116

6 3.953982 0.614671 5.130405

1 4.683600 1.099025 5.771804

6 2.734364 0.223781 5.637240

1 2.492789 0.392076 6.683230

6 -0.455572 -1.334851 4.515192

1 -1.425652 -1.618844 4.911930

6 -0.162447 -5.009204 -2.355081

1 0.176159 -5.906625 -1.855819

6 4.260131 0.368133 3.775970

1 5.224974 0.658711 3.373455

6 3.344597 -0.252013 2.949570

1 3.647596 -0.493819 1.938195

6 0.648590 -3.893809 -2.703096

1 1.708431 -3.811516 -2.532769

6 5.257271 0.837635 -2.016585

1 6.044477 1.370375 -1.473818

1 5.257186 1.149496 -3.060478

1 5.460024 -0.232740 -1.942062

6 4.113571 -3.068655 -1.441751

6 4.041201 -2.227424 -3.724803

1 4.414516 -2.233191 -4.744176

6 4.172939 -3.943489 0.823197

1 4.592730 -4.611791 1.568596

6 -0.300440 -3.433066 0.624548

1 0.537544 -3.997694 1.003208

6 -0.251623 -2.047891 0.214257

6 2.558801 -2.208524 0.266187

6 -6.075184 -2.655747 1.712807

1 -6.776245 -3.455372 1.942992

6 -5.581257 3.553818 -0.204917

6 -0.192203 -1.521638 3.138710

1 -0.980252 -1.911635 2.509693

6 -7.515003 -2.079555 -0.285136

1 -7.704693 -3.146356 -0.441729

1 -7.397932 -1.606804 -1.264048

1 -8.413825 -1.656408 0.179679

6 -1.526001 -3.406287 -3.299746

1 -2.406318 -2.883887 -3.642770

6 -0.398573 2.661678 1.183605

6 -1.420746 3.404934 2.004704

1 -2.277002 3.680618 1.390278

1 -0.948294 4.320864 2.378289

1 -1.732111 2.797153 2.853681

6 -6.925756 4.027810 0.292802

1 -7.015193 5.116231 0.226084

1 -7.091844 3.735341 1.333822

1 -7.742111 3.597411 -0.300741

6 1.760200 -0.393932 4.812060

6 2.986823 -1.354946 -3.365476

1 2.558989 -0.683736 -4.102869

6 4.591097 -3.065002 -2.781136

1 5.400063 -3.740523 -3.045409

1 -2.141534 2.331147 -1.511500

8 2.989769 2.863235 1.451482

8 2.272024 4.006331 -0.345227

6 2.898604 3.917619 0.754599

6 3.556379 5.168187 1.284130

1 2.902291 5.615351 2.039875

1 3.710267 5.888620 0.480365

1 4.503092 4.916796 1.766066

----------------------------------------------------------------------------------------------------------------

**A4**

----------------------------------------------------------------------------------------------------------------

Number of imaginary frequencies: 0

Electronic energy: HF = -6460.6865754

Zero-point correction = 1.774366 (Hartree/Particle)

Thermal correction to Energy = 1.891697

Thermal correction to Enthalpy = 1.892641

Thermal correction to Gibbs Free Energy = 1.610623

Sum of electronic and zero-point Energies = -6458.912210

Sum of electronic and thermal Energies = -6458.794879

Sum of electronic and thermal Enthalpies = -6458.793935

Sum of electronic and thermal Free Energies = -6459.075953

......................................................................................................................................................

Cartesian Coordinates

......................................................................................................................................................

45 -1.283069 1.815714 0.117295

45 1.138330 1.873075 -0.420510

8 -1.304327 3.843823 -0.297062

8 -1.042151 -0.229966 0.431310

8 -1.583741 1.434009 -1.897984

8 0.590261 1.804940 -2.420828

8 0.953443 3.938328 -0.444845

8 1.076511 -0.189324 -0.373199

6 -0.622717 1.583899 -2.718583

6 0.029563 -0.786849 0.033287

6 -0.973133 1.514262 -4.187246

1 -1.766035 0.782840 -4.351387

1 -0.091557 1.267138 -4.779970

1 -1.344311 2.494930 -4.503509

6 0.095743 -2.292773 0.032245

1 -0.886536 -2.740316 0.144376

1 0.744999 -2.621002 0.847113

1 0.532407 -2.613761 -0.910443

6 -0.203222 4.460439 -0.441322

6 -0.279433 5.954980 -0.654249

1 -1.216872 6.349116 -0.259654

1 -0.236784 6.158860 -1.729400

1 0.577586 6.444732 -0.188077

8 -0.752560 2.201809 2.086566

8 1.451162 1.931519 1.630832

6 0.473057 2.144870 2.413581

6 0.804912 2.376665 3.870423

1 0.974405 3.447865 4.024648

1 1.716865 1.842706 4.140729

1 -0.027476 2.066458 4.503963

26 -6.442862 -0.600918 -2.680037

15 -3.731392 1.841396 0.557196

15 -4.396000 -1.708156 -0.013044

6 -5.797850 0.523347 -1.049587

6 -3.633942 4.397052 1.629254

6 -4.996591 -2.593790 1.496486

6 -5.806409 3.797614 0.758482

1 -6.464547 3.080612 0.278379

6 -7.980442 -0.187209 -1.373708

1 -9.022623 -0.199061 -1.662527

6 -4.460444 3.472451 0.986729

6 -6.166123 0.081778 3.411897

6 -4.529924 1.325387 -1.072822

1 -3.750191 0.665396 -1.455132

6 -3.430882 0.338219 2.859163

1 -2.375645 0.432953 2.632477

6 -4.129456 5.643257 2.036005

6 -4.374021 0.852421 1.961420

6 -7.102456 0.936548 -1.454199

1 -7.365810 1.916286 -1.826943

6 -3.836012 -0.294052 4.038600

6 -5.739868 0.723401 2.247366

1 -6.480907 1.119090 1.561939

6 -4.949492 -0.860118 -4.098295

1 -3.896299 -0.728049 -3.897259

6 -3.991672 -3.149988 2.360419

6 -2.815571 -0.831840 5.010751

1 -3.029607 -1.871849 5.272253

1 -2.807714 -0.248076 5.939218

1 -1.811747 -0.798413 4.580133

6 -4.553628 2.540829 -2.010378

1 -5.349492 3.244816 -1.761984

1 -4.697136 2.201865 -3.038146

1 -3.602926 3.075581 -1.955100

6 -7.162410 -0.443742 -4.615497

1 -8.077206 0.070413 -4.876221

6 -3.031075 -3.110603 -2.068053

6 -2.184486 -1.975047 -2.213291

1 -2.345144 -1.112276 -1.579064

6 -5.467486 5.947985 1.781657

1 -5.859796 6.916189 2.086645

6 -3.224263 6.621670 2.744921

1 -3.666958 7.620804 2.787521

1 -2.254672 6.699527 2.241419

1 -3.026389 6.301309 3.774964

6 -4.888991 -4.308701 -1.052554

1 -5.690935 -4.362568 -0.323686

6 -3.616823 -5.389789 -2.801755

1 -3.421377 -6.242286 -3.446685

6 -5.766566 -4.122184 3.759245

1 -6.059548 -4.727530 4.612924

6 -2.047428 -4.332582 4.043368

1 -1.288757 -4.785306 4.674949

6 -3.383342 -4.540945 4.299262

1 -3.696742 -5.158282 5.137262

6 -6.712736 -3.522693 2.963228

1 -7.769643 -3.641180 3.184509

6 -7.044943 -1.817433 -4.246867

1 -7.857325 -2.527401 -4.173881

6 -1.657020 -3.494061 2.972805

1 -0.605312 -3.287337 2.811859

6 -2.605947 -2.914073 2.162634

1 -2.309308 -2.212448 1.392952

6 -5.680827 -2.075203 -3.928209

1 -5.280432 -3.013614 -3.579380

6 -2.776373 -4.251123 -2.903548

6 -0.875357 -3.112851 -3.911215

1 -0.036064 -3.106103 -4.598562

6 -4.652471 -5.417290 -1.896589

1 -5.287917 -6.294619 -1.818259

6 -7.221198 -1.307848 -0.928351

1 -7.589831 -2.317572 -0.824308

6 -5.869049 -0.878029 -0.701446

6 -4.115747 -3.165156 -1.127671

6 -5.203516 -0.417251 4.297067

1 -5.529760 -0.929751 5.199408

6 -6.321439 5.035019 1.145699

6 -6.325688 -2.765535 1.832775

1 -7.098087 -2.308226 1.230721

6 -7.635887 -0.073218 3.713912

1 -7.870457 -1.106836 3.987486

1 -8.248102 0.196256 2.848710

1 -7.941544 0.564822 4.551632

6 -5.865175 0.144823 -4.529451

1 -5.630113 1.181280 -4.724015

6 -7.763514 5.392657 0.877814

1 -8.255720 5.770964 1.780233

1 -8.328391 4.525192 0.524936

1 -7.844453 6.175650 0.114314

6 -4.386019 -3.950658 3.481419

6 -1.133872 -1.979583 -3.104559

1 -0.477538 -1.118487 -3.167961

6 -1.685592 -4.219875 -3.813942

1 -1.502221 -5.094495 -4.432577

1 -2.594226 4.144733 1.805972

26 6.594218 -0.054114 2.511363

15 3.604125 1.914865 -0.869689

15 4.449688 -1.713558 0.176122

6 5.734135 0.762811 0.787210

6 3.862088 4.690097 -0.776926

6 5.113216 -2.855428 -1.123167

6 5.104423 3.675462 -2.574638

1 5.412592 2.804343 -3.138586

6 7.981009 0.236539 1.018909

1 9.041574 0.329839 1.209036

6 4.287705 3.529202 -1.445378

6 6.005571 -0.274163 -3.442664

6 4.435616 1.516529 0.795697

1 3.680231 0.858259 1.228176

6 3.287381 -0.051205 -2.798110

1 2.239887 0.035883 -2.539553

6 4.269009 5.959350 -1.190475

6 4.230011 0.709895 -2.098248

6 7.036107 1.305862 1.003877

1 7.260227 2.347178 1.185343

6 3.684483 -0.934725 -3.808497

6 5.592189 0.567945 -2.408686

1 6.336574 1.125217 -1.849818

6 5.278493 -0.085157 4.118047

1 4.208368 0.035057 4.026493

6 4.181877 -3.753200 -1.756603

6 2.658161 -1.796162 -4.500746

1 3.080079 -2.301943 -5.373304

1 1.799955 -1.200168 -4.831208

1 2.282274 -2.565829 -3.818905

6 4.479958 2.774395 1.669934

1 5.184521 3.515637 1.286077

1 4.784512 2.495602 2.679041

1 3.491355 3.229198 1.727358

6 7.537938 0.362296 4.306665

1 8.477063 0.893030 4.380798

6 3.230187 -2.603151 2.570576

6 2.361352 -1.477923 2.479630

1 2.439324 -0.817085 1.625033

6 5.111044 6.068546 -2.302452

1 5.432374 7.053720 -2.634819

6 3.759786 7.191860 -0.482218

1 2.868840 7.592158 -0.982300

1 4.509969 7.988749 -0.470214

1 3.482390 6.969728 0.552432

6 5.032064 -4.014130 1.744835

1 5.788875 -4.236815 0.999350

6 3.908795 -4.628564 3.797827

1 3.779390 -5.293306 4.647531

6 5.951468 -4.458580 -3.317924

1 6.267684 -5.071514 -4.157665

6 2.364526 -5.470381 -3.094636

1 1.655321 -6.115191 -3.604562

6 3.668730 -5.389937 -3.525234

1 4.006118 -5.974964 -4.376819

6 6.831150 -3.613862 -2.689386

1 7.861855 -3.545946 -3.024318

6 7.377127 -1.047371 4.153379

1 8.174327 -1.774908 4.086656

6 1.945615 -4.708518 -1.979612

1 0.915986 -4.772815 -1.642746

6 2.835047 -3.880634 -1.329980

1 2.502085 -3.301196 -0.481067

6 5.985056 -1.323649 4.039147

1 5.548770 -2.296009 3.882246

6 3.065157 -3.492866 3.685432

6 1.239590 -2.122319 4.532653

1 0.465636 -1.932179 5.269694

6 4.866900 -4.887029 2.844358

1 5.503315 -5.762663 2.932557

6 7.267298 -0.981740 0.827418

1 7.693407 -1.973799 0.843935

6 5.874337 -0.670538 0.654974

6 4.251955 -2.882338 1.600498

6 5.039725 -1.015573 -4.133570

1 5.357930 -1.697219 -4.918006

6 5.528561 4.937213 -3.007391

6 6.404651 -2.803232 -1.611088

1 7.111995 -2.104376 -1.190482

6 7.466053 -0.369875 -3.809346

1 7.687970 -1.315801 -4.310048

1 8.102135 -0.295186 -2.921623

1 7.758784 0.440634 -4.488198

6 6.240337 0.954704 4.292315

1 6.033224 2.012596 4.366014

6 6.446189 5.062709 -4.200152

1 6.291203 6.009093 -4.726886

1 6.286185 4.246880 -4.911223

1 7.499790 5.028062 -3.895533

6 4.605285 -4.542160 -2.875725

6 1.389445 -1.249004 3.428816

1 0.717093 -0.406485 3.314248

6 2.060814 -3.219289 4.653558

1 1.951559 -3.900805 5.492982

1 3.167895 4.608674 0.047917

----------------------------------------------------------------------------------------------------------------

**A5**

----------------------------------------------------------------------------------------------------------------

Number of imaginary frequencies: 0

Electronic energy: HF = -3798.0505652

Zero-point correction = 0.993120 (Hartree/Particle)

Thermal correction to Energy =1.062567

Thermal correction to Enthalpy = 1.063512

Thermal correction to Gibbs Free Energy = 0.884979

Sum of electronic and zero-point Energies = -3797.057445

Sum of electronic and thermal Energies = -3796.987998

Sum of electronic and thermal Enthalpies = -3796.987054

Sum of electronic and thermal Free Energies = -3797.165586

......................................................................................................................................................

Cartesian Coordinates

......................................................................................................................................................

45 -0.515427 0.487355 -0.759195

45 -2.632588 1.242875 -1.875531

26 2.643808 -3.288095 0.063388

15 -1.324513 -0.990756 0.822739

15 1.730032 0.096680 0.128699

8 -0.730531 2.184639 0.398507

8 0.391445 1.785714 -2.187279

8 -0.513098 -1.054418 -2.185623

8 -2.619052 -0.571380 -2.896404

8 -2.395574 3.034986 -0.890076

8 -1.460920 1.918722 -3.443001

6 1.038112 -2.548109 1.102164

6 -3.571939 -2.142389 -0.355694

6 2.040596 1.293629 1.489583

6 -3.926516 -1.304675 1.879575

1 -3.553923 -0.821652 2.775223

6 3.023158 -3.228318 2.103519

1 3.761160 -3.841367 2.602178

6 -3.073899 -1.526000 0.793972

6 -0.380700 -0.967746 4.849679

6 -0.376788 -2.603644 0.565628

1 -0.313332 -2.621079 -0.526131

6 -1.401465 0.812182 2.941021

1 -1.774217 1.500143 2.196260

6 -4.912563 -2.517710 -0.450362

6 -1.550417 -1.238615 -2.921508

6 -1.062227 -0.491001 2.562054

6 -0.234480 2.134455 -3.235470

6 1.667818 -3.590833 1.854538

1 1.211003 -4.526935 2.137775

6 -1.215734 1.248628 4.255817

6 -0.564404 -1.377378 3.526270

1 -0.295557 -2.389128 3.256880

6 2.355849 -3.261719 -1.978988

1 1.717413 -2.538035 -2.463607

6 2.165123 2.698426 1.218977

6 -1.489506 2.685308 4.620433

1 -1.664759 2.804816 5.693395

1 -2.360743 3.074048 4.084782

1 -0.628890 3.309300 4.350090

6 -1.111671 -3.874352 1.014836

1 -1.266209 -3.908262 2.096311

1 -0.527221 -4.752579 0.724436

1 -2.089831 -3.948735 0.543017

6 3.051210 -5.123088 -0.799538

1 3.042193 -6.059278 -0.258560

6 4.465944 0.532840 -0.832722

6 4.982282 0.804240 0.464571

1 4.308010 0.832248 1.307781

6 -5.746623 -2.286095 0.647126

1 -6.793871 -2.575215 0.587535

6 -5.442305 -3.102739 -1.735694

1 -6.444081 -3.520860 -1.605355

1 -4.789281 -3.895770 -2.115270

1 -5.493996 -2.328724 -2.510176

6 2.688903 0.009295 -2.417404

1 1.647148 -0.196420 -2.621545

6 4.937693 0.279510 -3.247324

1 5.658321 0.288918 -4.060500

6 2.279394 3.097912 3.650619

1 2.377458 3.796774 4.477146

6 -1.478303 -2.420688 -3.862257

1 -0.518482 -2.426192 -4.384363

1 -2.299772 -2.389451 -4.577533

1 -1.541093 -3.347066 -3.280232

6 2.426985 5.485822 0.788047

1 2.527884 6.551986 0.608643

6 2.421303 4.995588 2.073284

1 2.517576 5.667443 2.922065

6 2.145323 1.750714 3.881772

1 2.123267 1.362413 4.894464

6 4.171941 -4.253082 -0.954061

1 5.160405 -4.414035 -0.546386

6 2.294170 4.595187 -0.302851

1 2.282707 4.982526 -1.317223

6 2.167367 3.239781 -0.093419

1 2.026414 2.591432 -0.946646

6 3.744705 -3.102672 -1.679329

1 4.350651 -2.243074 -1.920965

6 0.554227 2.875986 -4.289085

1 0.706871 3.906711 -3.951927

1 0.012341 2.892220 -5.235011

1 1.538178 2.416830 -4.411310

6 5.396625 0.538965 -1.929604

6 7.231155 1.048053 -0.412732

1 8.284099 1.246070 -0.237870

6 3.610157 0.019121 -3.486813

1 3.260034 -0.185582 -4.493948

6 3.252127 -1.958190 1.514623

1 4.187117 -1.420439 1.500540

6 2.027899 -1.513287 0.905489

6 3.085514 0.251617 -1.112634

6 -0.706808 0.348318 5.195909

1 -0.551756 0.681136 6.220081

6 -5.270836 -1.679663 1.814847

6 2.024557 0.850585 2.799872

1 1.907852 -0.202930 3.014676

6 0.145471 -1.935090 5.882228

1 0.728026 -1.419769 6.651646

1 0.784627 -2.694859 5.422859

1 -0.674014 -2.458123 6.390163

6 1.929909 -4.510212 -1.437896

1 0.921409 -4.900019 -1.461816

6 -1.527811 3.111476 0.026524

6 -1.396429 4.413958 0.778105

1 -1.497947 4.226855 1.850815

1 -2.152679 5.125744 0.447622

1 -0.394174 4.819378 0.614513

6 -6.204382 -1.395252 2.965786

1 -6.811018 -0.504119 2.763105

1 -5.652373 -1.213402 3.892004

1 -6.896268 -2.225969 3.137490

6 2.291640 3.603648 2.323778

6 6.321268 1.052414 0.668839

1 6.678786 1.260981 1.672676

6 6.771463 0.798521 -1.683570

1 7.455045 0.795918 -2.528283

1 -2.928266 -2.305281 -1.208568

8 -5.019521 1.688582 -2.264262

8 -4.062194 0.804858 -0.472829

6 -5.108436 1.226915 -1.106541

6 -6.434762 1.098984 -0.392052

1 -7.159859 1.793956 -0.818134

1 -6.308609 1.280688 0.677797

1 -6.804643 0.076258 -0.513453

----------------------------------------------------------------------------------------------------------------

**A6**

----------------------------------------------------------------------------------------------------------------

Number of imaginary frequencies: 0

Electronic energy: HF = -3798.0502597

Zero-point correction = 0.993060 (Hartree/Particle)

Thermal correction to Energy = 1.062611

Thermal correction to Enthalpy = 1.063555

Thermal correction to Gibbs Free Energy = 0.885037

Sum of electronic and zero-point Energies = -3797.057200

Sum of electronic and thermal Energies = -3796.987649

Sum of electronic and thermal Enthalpies = -3796.986705

Sum of electronic and thermal Free Energies = -3797.165223

......................................................................................................................................................

Cartesian Coordinates

......................................................................................................................................................

45 0.649361 -0.984295 -0.072141

45 -0.582479 -3.182849 -0.349425

26 -0.860010 3.062997 -2.461302

15 2.307999 0.777526 -0.055247

15 -1.023003 0.631958 0.113292

8 0.729179 -0.968485 -2.169482

8 2.356914 -2.229883 0.014823

8 0.569970 -1.348459 1.959399

8 -0.414240 -3.383118 1.695711

8 -0.546950 -2.832773 -2.404541

8 1.258488 -4.073945 -0.623055

6 0.680448 2.720722 -1.147282

6 4.066617 -0.605650 -1.691223

6 -1.206913 1.039327 1.903541

6 5.080684 0.322464 0.301115

1 4.999161 0.890626 1.222303

6 -0.754131 4.540483 -1.011445

1 -1.163412 5.534416 -1.127353

6 3.957414 0.135381 -0.502817

6 2.830973 3.846430 2.679453

6 1.898369 1.900396 -1.483218

1 1.600874 1.153848 -2.226922

6 2.511223 1.059126 2.661282

1 2.319852 -0.008897 2.646722

6 5.287251 -1.153759 -2.078171

6 0.108880 -2.462692 2.387200

6 2.558403 1.765815 1.451931

6 2.315279 -3.449817 -0.324022

6 0.553620 4.123521 -1.389224

1 1.306590 4.748873 -1.845195

6 2.625573 1.727413 3.883371

6 2.715003 3.157526 1.468095

1 2.725383 3.718876 0.542218

6 -1.283832 1.550030 -3.796179

1 -1.172055 0.507247 -3.549920

6 -1.931495 0.182018 2.798000

6 2.479427 0.967654 5.177085

1 2.911875 1.515321 6.019256

1 2.959784 -0.013610 5.120579

1 1.417327 0.800751 5.393298

6 3.050889 2.716901 -2.077324

1 3.433963 3.472678 -1.387591

1 2.712810 3.226624 -2.985732

1 3.880393 2.061193 -2.345006

6 -0.795729 3.717396 -4.421133

1 -0.257827 4.596876 -4.747216

6 -3.925825 1.037856 -0.189985

6 -4.042236 1.931053 0.911565

1 -3.175333 2.145014 1.517043

6 6.405371 -0.953620 -1.253038

1 7.362140 -1.381882 -1.544153

6 5.394831 -1.988496 -3.331520

1 6.305692 -1.756625 -3.892582

1 4.537599 -1.825566 -3.990792

1 5.425356 -3.058015 -3.090659

6 -2.745049 -0.501430 -1.658207

1 -1.852490 -1.043871 -1.918272

6 -5.088274 -0.122823 -2.045701

1 -6.006877 -0.303812 -2.597258

6 -1.342127 1.708345 4.644254

1 -1.402555 1.963029 5.699172

6 0.190217 -2.665886 3.880960

1 1.182772 -2.383233 4.240431

1 -0.027025 -3.703250 4.135216

1 -0.542527 -2.014173 4.364661

6 -3.347229 -1.440104 4.635610

1 -3.889860 -2.073702 5.330685

6 -2.713483 -0.302745 5.083376

1 -2.751973 -0.023871 6.133087

6 -0.654515 2.510040 3.767284

1 -0.148044 3.404557 4.112350

6 -2.146253 3.682741 -3.959501

1 -2.807317 4.533877 -3.871832

6 -3.284847 -1.783985 3.266566

1 -3.764455 -2.689431 2.909268

6 -2.601901 -0.991110 2.370921

1 -2.570492 -1.306173 1.336942

6 -2.449081 2.344373 -3.569729

1 -3.374839 1.996711 -3.136053

6 3.624554 -4.202766 -0.345171

1 4.437870 -3.530506 -0.624150

1 3.562961 -5.052557 -1.026578

1 3.826344 -4.583240 0.661790

6 -5.123053 0.772593 -0.943936

6 -6.406677 2.269769 0.485440

1 -7.345031 2.745281 0.753328

6 -3.920974 -0.753251 -2.394305

1 -3.888609 -1.457717 -3.219030

6 -1.452497 3.404631 -0.529402

1 -2.476247 3.391171 -0.194545

6 -0.574893 2.262950 -0.588420

6 -2.711827 0.378565 -0.595753

6 2.789476 3.116329 3.873709

1 2.867621 3.647066 4.820305

6 6.319988 -0.222563 -0.067442

6 -0.586400 2.171358 2.396327

1 -0.033224 2.822146 1.734032

6 3.019043 5.344019 2.694598

1 2.572146 5.793844 3.586083

1 2.565704 5.809562 1.814561

1 4.083318 5.609517 2.694744

6 -0.263451 2.395492 -4.321343

1 0.749468 2.097483 -4.555656

6 0.188955 -1.910050 -2.851815

6 0.473939 -1.898038 -4.336517

1 0.570182 -0.875364 -4.705900

1 -0.308458 -2.431789 -4.876910

1 1.424500 -2.414816 -4.509318

6 7.536023 0.005730 0.797199

1 8.349577 -0.673816 0.529421

1 7.303456 -0.142713 1.856533

1 7.911294 1.030670 0.689480

6 -1.994933 0.532500 4.187475

6 -5.240106 2.527394 1.238342

1 -5.284991 3.198086 2.091092

6 -6.341096 1.406834 -0.582070

1 -7.227367 1.188892 -1.171916

1 3.180845 -0.782643 -2.293471

6 -3.101809 -3.892226 -0.305949

8 -2.570902 -2.720612 -0.130874

8 -2.398918 -4.891973 -0.541644

6 -4.609838 -3.953308 -0.205366

1 -4.918142 -3.735695 0.822477

1 -5.051813 -3.185058 -0.846358

1 -4.970455 -4.942082 -0.490701

----------------------------------------------------------------------------------------------------------------

**A7**

----------------------------------------------------------------------------------------------------------------

Number of imaginary frequencies: 0

Electronic energy: HF=-3568.9304432

Zero-point correction = 0.929126 (Hartree/Particle)

Thermal correction to Energy = 0.992670

Thermal correction to Enthalpy = 0.993614

Thermal correction to Gibbs Free Energy = 0.830090

Sum of electronic and zero-point Energies = -3568.001317

Sum of electronic and thermal Energies = -3567.937774

Sum of electronic and thermal Enthalpies = -3567.936829

Sum of electronic and thermal Free Energies = -3568.100353

......................................................................................................................................................

Cartesian Coordinates

......................................................................................................................................................

45 0.648288 -0.189444 -0.970524

45 2.871418 -0.144402 -2.086319

26 -2.492341 3.021447 0.853549

15 1.525558 0.766250 0.895989

15 -1.494859 -0.243690 0.084387

8 0.331505 1.682598 -1.858926

8 2.384168 1.721663 -2.828334

8 1.148867 -2.089719 -0.356065

8 3.170798 -2.069260 -1.387943

6 1.238342 2.196246 -2.607441

6 -2.709145 0.308715 -2.287792

1 -1.696848 0.582420 -2.551011

6 -2.401429 3.419641 -1.167972

1 -1.817945 2.812861 -1.842019

6 -2.755197 2.488751 2.839427

1 -3.490252 2.935908 3.494238

6 -1.759100 1.136045 1.238668

6 -0.797857 2.151965 1.627684

6 -2.954521 4.991616 0.432691

1 -2.881249 5.795180 1.152498

6 -2.962773 -0.211329 -1.029336

6 2.381562 -4.093939 -0.394221

1 1.511733 -4.642024 -0.766658

1 2.384836 -4.202175 0.694446

1 3.301768 -4.502887 -0.811042

6 1.369152 3.481648 1.854544

1 1.505474 3.254855 2.915272

6 -1.430760 2.965736 2.619831

1 -0.991831 3.834256 3.087813

6 1.405945 -0.122260 2.494463

6 0.795840 -0.263945 4.848175

6 -3.756375 3.192879 -0.775834

1 -4.392081 2.395822 -1.130987

6 -1.907614 4.530489 -0.422873

1 -0.899580 4.920955 -0.458725

6 -2.964265 1.372887 1.988933

1 -3.878652 0.808946 1.892935

6 2.234505 -2.634342 -0.754099

6 -5.341186 -0.418222 -1.654177

6 -3.739846 0.487986 -3.235806

1 -3.501549 0.908084 -4.208045

6 -6.675957 -0.784377 -1.335217

1 -7.446970 -0.622648 -2.083701

6 2.299250 -3.604964 3.758400

1 1.505760 -4.254763 3.368886

1 2.536927 -3.940626 4.771795

1 3.184727 -3.752851 3.132910

6 -4.663679 -1.198371 0.560548

1 -3.900353 -1.391857 1.299696

6 -1.593835 -1.749933 1.126454

6 -1.565435 -1.646316 2.505052

1 -1.572801 -0.671854 2.974382

6 -1.557081 -3.044790 0.508036

6 -1.443907 -5.641142 -0.613569

1 -1.401234 -6.631464 -1.057106

6 1.284960 -1.572946 4.874717

1 1.223446 -2.145016 5.798042

6 -1.501004 -4.497437 -1.444488

1 -1.490397 -4.613353 -2.524108

6 0.220990 0.377821 6.087762

1 0.998469 0.892978 6.665166

1 -0.234486 -0.366006 6.748210

1 -0.541822 1.119412 5.832023

6 -1.556866 -3.234147 -0.899801

1 -1.554485 -2.380766 -1.564870

6 -1.480185 -4.047187 2.759543

1 -1.437880 -4.936342 3.383163

6 -4.096722 4.164780 0.210813

1 -5.038798 4.231542 0.737399

6 -4.298234 -0.613890 -0.683506

6 1.918109 -1.423218 2.560666

1 2.353893 -1.868239 1.678009

6 0.608010 2.381860 1.107351

1 0.523156 2.689541 0.062929

6 0.855727 0.450943 3.647255

1 0.445825 1.450656 3.622695

6 1.844967 -2.167637 3.739128

6 -5.030603 0.138975 -2.922294

1 -5.834590 0.278264 -3.639892

6 -5.967499 -1.545737 0.836994

1 -6.208648 -1.995373 1.795506

6 -1.496506 -4.204380 1.348433

6 -1.512962 -2.795374 3.324696

1 -1.486760 -2.674202 4.402236

6 -1.440769 -5.493124 0.753927

1 -1.395551 -6.362381 1.404682

6 -6.990113 -1.333497 -0.115010

1 -8.013888 -1.611034 0.115952

6 3.295451 1.050924 0.678649

6 4.080182 1.551476 1.738850

6 3.854803 0.668963 -0.555656

6 5.447047 1.729137 1.579429

6 5.256356 0.854179 -0.704626

6 6.012859 1.377595 0.338952

1 7.085467 1.507025 0.198224

6 0.866940 3.491189 -3.293554

1 0.173939 3.273387 -4.112996

1 0.352675 4.157169 -2.596938

1 1.755785 3.974358 -3.698972

6 0.679575 -1.322249 -3.760532

8 -0.094292 -1.070920 -2.775111

8 1.903875 -1.046778 -3.821162

6 0.037440 -2.044078 -4.929173

1 0.653709 -1.952250 -5.824134

1 -0.058193 -3.105298 -4.674492

1 -0.967535 -1.655908 -5.110289

1 0.824147 4.427997 1.776429

1 2.357151 3.622445 1.413297

6 5.914601 0.460416 -2.008006

1 5.778429 -0.609583 -2.207668

1 5.476995 1.007988 -2.851723

1 6.989805 0.665300 -1.996683

6 6.309702 2.272172 2.692174

1 6.777456 3.223195 2.410226

1 5.723820 2.445670 3.599455

1 7.120599 1.579421 2.945504

1 3.617306 1.782467 2.694867

----------------------------------------------------------------------------------------------------------------

**A8**

----------------------------------------------------------------------------------------------------------------

Number of imaginary frequencies: 0

Electronic energy: HF=-3874.508847

Zero-point correction = 1.019621 (Hartree/Particle)

Thermal correction to Energy = 1.090840

Thermal correction to Enthalpy = 1.091785

Thermal correction to Gibbs Free Energy = 0.911121

Sum of electronic and zero-point Energies = -3873.489226

Sum of electronic and thermal Energies = -3873.418007

Sum of electronic and thermal Enthalpies = -3873.417062

Sum of electronic and thermal Free Energies = -3873.597726

......................................................................................................................................................

Cartesian Coordinates

......................................................................................................................................................

45 0.451435 -0.760088 -0.563577

45 2.467797 -2.033272 -1.297849

26 -2.675647 3.181043 -1.029993

15 1.360043 1.191756 0.306556

15 -1.776876 0.011098 0.164823

8 0.622702 -1.897384 1.157103

8 -0.545818 -2.445371 -1.402644

8 0.481533 0.114539 -2.469135

8 2.545512 -0.719859 -2.922454

8 2.114258 -3.346295 0.247464

8 1.256989 -3.156961 -2.537245

6 -1.006099 2.793142 0.100222

6 3.788374 1.519183 -1.102612

6 -2.060537 -0.640924 1.861947

6 3.661466 2.642999 1.029207

1 3.131899 2.868035 1.947721

6 -2.901125 3.862975 0.916769

1 -3.591974 4.641732 1.209157

6 3.084346 1.800160 0.068799

6 0.516670 2.555385 4.125824

6 0.363596 2.586614 -0.505254

1 0.223187 2.155723 -1.500656

6 1.597896 0.272134 2.906567

1 2.017437 -0.600952 2.426159

6 5.067570 2.042983 -1.318626

6 1.502490 -0.071413 -3.221578

6 1.161927 1.342537 2.117317

6 0.024271 -3.191765 -2.255918

6 -1.563269 4.060049 0.466157

1 -1.072987 5.016525 0.364601

6 1.463014 0.309957 4.296246

6 0.637907 2.484954 2.734105

1 0.307093 3.326420 2.140306

6 -2.524070 2.445809 -2.952741

1 -1.919256 1.587474 -3.205079

6 -2.252936 -2.045095 2.095759

6 1.822845 -0.894727 5.127892

1 2.147058 -0.612670 6.133973

1 2.620716 -1.478464 4.660087

1 0.949216 -1.550481 5.232442

6 1.123154 3.908649 -0.673784

1 1.380335 4.367382 0.284768

1 0.503838 4.612679 -1.237623

1 2.051830 3.757262 -1.223168

6 -3.152569 4.610277 -2.447109

1 -3.114232 5.675356 -2.264547

6 -4.550379 -0.645678 -0.520015

6 -5.028763 -0.420310 0.800166

1 -4.326455 -0.169433 1.581675

6 5.614111 2.897448 -0.356496

1 6.604922 3.316555 -0.518277

6 5.852014 1.613162 -2.532780

1 6.723058 2.253015 -2.699153

1 5.233094 1.627686 -3.435258

1 6.199813 0.582699 -2.397047

6 -2.812790 -0.776880 -2.224793

1 -1.772390 -0.692431 -2.509894

6 -5.092766 -1.252564 -2.854780

1 -5.838755 -1.526924 -3.595632

6 -2.208302 -1.590565 4.520623

1 -2.270440 -1.962014 5.540089

6 1.443908 0.550111 -4.597033

1 1.079792 -0.202797 -5.304213

1 2.444499 0.848858 -4.913897

1 0.761908 1.401810 -4.611282

6 -2.658104 -4.792663 2.659990

1 -2.817193 -5.847565 2.862343

6 -2.546340 -3.895574 3.696975

1 -2.613782 -4.231445 4.728353

6 -2.007884 -0.255508 4.269487

1 -1.896283 0.450936 5.085124

6 -4.274717 3.758628 -2.218138

1 -5.235020 4.066138 -1.827724

6 -2.555467 -4.336403 1.325142

1 -2.625484 -5.045563 0.505750

6 -2.359029 -3.000787 1.051160

1 -2.245247 -2.690405 0.022500

6 -3.888603 2.422052 -2.527649

1 -4.503736 1.542311 -2.419220

6 -0.842075 -4.206488 -2.964265

1 -1.053053 -5.029478 -2.273172

1 -0.331128 -4.604850 -3.841186

1 -1.796632 -3.753089 -3.241794

6 -5.515560 -1.012562 -1.521144

6 -7.309588 -0.889016 0.119242

1 -8.360263 -0.978078 0.377405

6 -3.768100 -1.135666 -3.200503

1 -3.446400 -1.312272 -4.222370

6 -3.190846 2.475940 0.837164

1 -4.132208 2.006400 1.075660

6 -2.021281 1.796840 0.349734

6 -3.173983 -0.526910 -0.911216

6 0.923675 1.456652 4.889161

1 0.812802 1.492383 5.970988

6 4.924507 3.204595 0.822283

6 -1.938323 0.216839 2.939816

1 -1.772326 1.272436 2.775296

6 -0.033506 3.799174 4.781078

1 -0.534815 3.564797 5.724773

1 -0.752653 4.304147 4.129210

1 0.765170 4.516582 5.006351

6 -2.071785 3.797042 -2.906123

1 -1.070673 4.138259 -3.131070

6 1.308645 -2.969810 1.154291

6 1.120470 -3.869044 2.350849

1 1.203862 -3.278146 3.266070

1 1.855679 -4.673892 2.348991

1 0.109405 -4.284850 2.324743

6 5.552078 4.087186 1.873928

1 6.249793 3.517663 2.500021

1 4.795781 4.518117 2.536116

1 6.117893 4.907665 1.421784

6 -2.339591 -2.512605 3.448696

6 -6.365283 -0.536845 1.110399

1 -6.694525 -0.363222 2.130426

6 -6.886912 -1.123429 -1.167347

1 -7.597914 -1.399848 -1.941230

1 3.383453 0.833392 -1.830619

8 5.649724 -1.626988 -0.694940

8 3.609503 -1.084756 0.119910

6 4.895582 -1.113227 0.158669

6 5.506631 -0.424906 1.366407

1 6.291042 -1.058147 1.788384

1 4.751953 -0.195543 2.119168

1 5.968869 0.509127 1.036361

8 4.229533 -3.274283 -2.094477

1 4.199796 -4.095068 -1.585676

1 4.903597 -2.684489 -1.635343

----------------------------------------------------------------------------------------------------------------

**A9**

----------------------------------------------------------------------------------------------------------------

Number of imaginary frequencies: 0

Electronic energy: HF=-5261.8296389

Zero-point correction = 1.011271 (Hartree/Particle)

Thermal correction to Energy = 1.088453

Thermal correction to Enthalpy = 1.089397

Thermal correction to Gibbs Free Energy = 0.894343

Sum of electronic and zero-point Energies = -5260.818367

Sum of electronic and thermal Energies = -5260.741186

Sum of electronic and thermal Enthalpies = -5260.740242

Sum of electronic and thermal Free Energies = -5260.935295

......................................................................................................................................................

Cartesian Coordinates

......................................................................................................................................................

45 0.260572 -0.375450 -0.092446

45 2.694158 -1.081078 0.072385

26 -3.747598 2.009624 -2.143418

15 0.402723 1.900089 0.061664

15 -2.224843 -0.247220 0.069611

8 0.256423 -0.652991 1.950116

8 -0.055187 -2.479905 -0.274017

8 0.583885 -0.309778 -2.181851

8 2.831103 -0.597709 -1.983156

8 2.278235 -1.684317 1.985631

8 2.099229 -2.984490 -0.666212

6 -2.316084 2.515821 -0.759466

6 2.463311 2.593643 -1.700833

6 -2.662421 -0.435735 1.850228

6 2.393673 3.886252 0.332711

1 1.953505 4.098454 1.300167

6 -4.574668 3.031009 -0.535112

1 -5.510500 3.571368 -0.574014

6 1.893076 2.842804 -0.448225

6 -1.239840 3.742420 3.382198

6 -0.854723 2.670410 -1.133457

1 -0.669977 2.039226 -2.010181

6 0.916487 2.054668 2.766111

1 1.753773 1.414792 2.507879

6 3.537105 3.350470 -2.164976

6 1.759149 -0.477589 -2.647277

6 0.066225 2.511390 1.744925

6 0.869862 -3.280915 -0.567085

6 -3.292525 3.561176 -0.858049

1 -3.103992 4.573973 -1.178506

6 0.693742 2.425968 4.090373

6 -0.992992 3.365002 2.054173

1 -1.653508 3.727695 1.276159

6 -2.983916 0.894860 -3.702071

1 -2.122226 0.251859 -3.596873

6 -2.519495 -1.688444 2.538018

6 1.597322 1.922959 5.189880

1 2.043624 2.751102 5.751917

1 2.407121 1.311956 4.783693

1 1.040937 1.308831 5.907262

6 -0.543330 4.124296 -1.522985

1 -0.631472 4.800354 -0.667814

1 -1.244292 4.452397 -2.295897

1 0.463360 4.221316 -1.922848

6 -4.296373 2.774640 -3.985647

1 -4.603448 3.798906 -4.146103

6 -4.491337 -1.963784 -0.675876

6 -5.279173 -1.575383 0.442341

1 -4.853163 -0.912830 1.182210

6 4.022651 4.390633 -1.365224

1 4.861856 4.986277 -1.717573

6 4.204964 3.010243 -3.472603

1 4.529217 3.905926 -4.011727

1 3.540103 2.439218 -4.127646

1 5.099462 2.401324 -3.288607

6 -2.459255 -1.962142 -2.021531

1 -1.444290 -1.619762 -2.185440

6 -4.327331 -3.310620 -2.741841

1 -4.790179 -4.000084 -3.442774

6 -3.002637 -0.523089 4.658975

1 -3.128928 -0.564470 5.737489

6 1.887434 -0.529818 -4.156331

1 2.064232 -1.566959 -4.460460

1 2.750176 0.059373 -4.477845

1 0.981205 -0.164821 -4.640686

6 -2.261979 -4.115069 3.980813

1 -2.160615 -5.051095 4.521764

6 -2.583823 -2.957020 4.650077

1 -2.735948 -2.964793 5.726113

6 -3.110390 0.666464 3.982252

1 -3.315601 1.589179 4.515647

6 -5.151199 1.686540 -3.635318

1 -6.219691 1.744268 -3.479861

6 -2.054384 -4.080069 2.582624

1 -1.786627 -4.990847 2.054904

6 -2.184646 -2.901322 1.881841

1 -1.988590 -2.896452 0.819974

6 -4.342995 0.525652 -3.457452

1 -4.688585 -0.448795 -3.148226

6 0.472439 -4.727556 -0.806550

1 0.856401 -5.346008 0.012346

1 0.895050 -5.090907 -1.749901

1 -0.612470 -4.825650 -0.846676

6 -5.077356 -2.880876 -1.615555

6 -7.137566 -2.934831 -0.320986

1 -8.150361 -3.296960 -0.173529

6 -3.043432 -2.862313 -2.939665

1 -2.472268 -3.190040 -3.803254

6 -4.414369 1.655653 -0.228691

1 -5.200630 0.963500 0.027789

6 -3.021308 1.323444 -0.349408

6 -3.154842 -1.498573 -0.916413

6 -0.394676 3.262774 4.382432

1 -0.582958 3.546720 5.415967

6 3.466446 4.666949 -0.115751

6 -2.950128 0.704207 2.579512

1 -3.038767 1.657095 2.077101

6 -2.425408 4.618123 3.708063

1 -2.393409 4.966519 4.743917

1 -3.367698 4.073387 3.568808

1 -2.466172 5.496953 3.055854

6 -2.956167 2.282488 -4.030348

1 -2.069852 2.869932 -4.227643

6 1.188535 -1.318892 2.512147

6 0.932804 -1.715054 3.945753

1 0.443709 -0.891706 4.470106

1 1.865979 -1.994639 4.435287

1 0.244567 -2.565806 3.957025

6 4.023037 5.761033 0.761031

1 4.669430 5.340487 1.540573

1 3.224685 6.313666 1.266408

1 4.619982 6.472795 0.184088

6 -2.712626 -1.723369 3.958774

6 -6.562184 -2.044703 0.614626

1 -7.133953 -1.733150 1.483515

6 -6.404612 -3.343534 -1.409623

1 -6.829006 -4.033011 -2.134553

1 2.068567 1.802883 -2.320607

6 5.025342 -2.964733 -0.097917

8 5.364988 -3.131922 -1.353687

8 4.903909 -3.946154 0.693756

8 4.766988 -1.725191 0.300496

19 3.890120 -5.163084 -1.216444

19 5.528819 -0.613455 -1.884103

6 4.335641 1.314560 0.765828

6 4.777449 2.156658 1.955515

1 5.323349 1.504083 2.645948

1 5.440377 2.957839 1.625432

1 3.919239 2.569374 2.489888

8 4.999537 1.317096 -0.279690

8 3.255499 0.639592 1.001516

----------------------------------------------------------------------------------------------------------------

**A10**

----------------------------------------------------------------------------------------------------------------

Number of imaginary frequencies: 0

Electronic energy: HF=-4206.4043732

Zero-point correction = 1.121527 (Hartree/Particle)

Thermal correction to Energy = 1.199504

Thermal correction to Enthalpy = 1.200448

Thermal correction to Gibbs Free Energy = 1.003797

Sum of electronic and zero-point Energies = -4205.282846

Sum of electronic and thermal Energies = -4205.204869

Sum of electronic and thermal Enthalpies = -4205.203925

Sum of electronic and thermal Free Energies = -4205.400576

......................................................................................................................................................

Cartesian Coordinates

......................................................................................................................................................

45 0.084422 -0.498934 0.429963

45 2.336294 -1.139523 1.271582

26 -2.997603 0.424169 -3.435466

15 0.487938 1.579231 -0.525171

15 -2.301454 -0.226383 -0.065989

8 -0.224670 0.182222 2.350790

8 -0.421489 -2.435328 1.193839

8 0.655599 -1.412284 -1.378072

8 2.819120 -1.539043 -0.715325

8 1.609617 -0.871712 3.178081

8 1.708650 -3.117445 1.302524

6 -1.792846 1.592475 -2.254498

6 3.198086 1.486902 -1.329940

6 -3.080197 0.575423 1.394884

6 2.299574 3.690054 -0.921896

1 1.490384 4.336496 -0.602947

6 -3.939823 2.197003 -2.909007

1 -4.754753 2.638550 -3.465820

6 2.138617 2.298810 -0.917121

6 -1.701637 4.950393 0.464106

6 -0.285700 1.473867 -2.251226

1 -0.035500 0.439293 -2.502923

6 -0.070705 3.061150 1.745075

1 0.565086 2.331810 2.227584

6 4.419356 2.039071 -1.726769

6 1.882851 -1.744447 -1.539455

6 -0.317631 2.951454 0.371822

6 0.457818 -3.328316 1.360056

6 -2.551641 2.416021 -3.146348

1 -2.142805 3.056058 -3.913516

6 -0.662466 4.079255 2.496195

6 -1.120091 3.906912 -0.263359

1 -1.311418 3.844514 -1.326154

6 -2.128353 -1.385721 -3.912543

1 -1.401421 -1.869798 -3.277311

6 -3.218447 -0.122315 2.642626

6 -0.488326 4.119174 3.992962

1 -0.546523 5.139859 4.382249

1 0.471221 3.689822 4.294746

1 -1.280545 3.533989 4.476798

6 0.365393 2.380517 -3.303893

1 0.230701 3.442140 -3.079976

1 -0.078409 2.175107 -4.282634

1 1.436476 2.193237 -3.370901

6 -3.075901 0.036974 -5.466350

1 -3.194307 0.801807 -6.221433

6 -4.609414 -2.016147 -0.285438

6 -5.522359 -1.052353 0.224522

1 -5.149931 -0.094841 0.558135

6 4.549869 3.433090 -1.740579

1 5.492489 3.875008 -2.056321

6 5.582144 1.137828 -2.052381

1 6.299256 1.624943 -2.719334

1 5.256973 0.201369 -2.512937

1 6.109659 0.859228 -1.134775

6 -2.395516 -2.806787 -0.931320

1 -1.332549 -2.634374 -1.033468

6 -4.278694 -4.290883 -1.197126

1 -4.704639 -5.245458 -1.493596

6 -4.021471 1.976799 3.661213

1 -4.385403 2.508659 4.536283

6 2.240438 -2.439262 -2.829636

1 2.052805 -3.511702 -2.709061

1 3.301579 -2.303209 -3.041709

1 1.623623 -2.073392 -3.652881

6 -3.548021 -1.413319 5.144014

1 -3.672033 -1.920661 6.095915

6 -3.863468 -0.079974 5.021012

1 -4.238493 0.480354 5.873279

6 -3.868962 2.622673 2.459099

1 -4.098486 3.678572 2.364308

6 -4.130668 -0.654227 -4.798228

1 -5.189267 -0.501204 -4.956641

6 -3.051972 -2.121601 4.024799

1 -2.787269 -3.170011 4.124167

6 -2.892609 -1.493973 2.809037

1 -2.477046 -2.053348 1.983569

6 -3.548517 -1.531286 -3.837455

1 -4.085870 -2.161267 -3.145766

6 -0.016624 -4.726223 1.672592

1 -0.244675 -4.784451 2.742251

1 0.758308 -5.459222 1.444522

1 -0.932227 -4.943633 1.118814

6 -5.144804 -3.290047 -0.684371

6 -7.389864 -2.571051 -0.078523

1 -8.453845 -2.769126 0.005739

6 -2.930863 -4.053877 -1.319982

1 -2.270011 -4.816646 -1.720287

6 -4.061435 1.238830 -1.869455

1 -4.982233 0.835369 -1.478531

6 -2.740307 0.867007 -1.440700

6 -3.197585 -1.796043 -0.428141

6 -1.471333 5.014707 1.841976

1 -1.937237 5.809628 2.420669

6 3.503881 4.268666 -1.337734

6 -3.401726 1.918669 1.326971

1 -3.284196 2.456828 0.396773

6 -2.549664 5.986248 -0.233586

1 -3.316935 6.389537 0.433839

1 -3.048642 5.563355 -1.110635

1 -1.941270 6.831490 -0.577985

6 -1.837804 -0.420231 -4.920473

1 -0.853894 -0.060559 -5.188418

6 0.523187 -0.230825 3.299691

6 0.036207 0.081922 4.692449

1 -0.217782 1.142694 4.758561

1 0.795997 -0.174135 5.430753

1 -0.880115 -0.483315 4.883393

6 3.679752 5.767545 -1.304181

1 4.083521 6.093373 -0.337643

1 2.726931 6.285216 -1.449303

1 4.374487 6.106086 -2.078439

6 -3.707672 0.597297 3.782491

6 -6.869450 -1.319921 0.323772

1 -7.536901 -0.562327 0.723128

6 -6.539679 -3.533026 -0.568999

1 -6.921081 -4.502248 -0.878622

1 3.111624 0.413076 -1.286398

8 5.094032 0.513196 1.754536

8 2.869218 0.821894 1.467637

6 4.067743 1.223140 1.714104

6 4.197576 2.717417 1.944965

1 4.838181 2.896900 2.811788

1 3.223102 3.186208 2.083710

1 4.679440 3.161669 1.069775

6 7.141139 -2.557841 -2.467899

6 6.153833 -2.934795 -1.558039

6 6.112675 -2.398206 -0.259363

6 7.110388 -1.478341 0.102381

6 8.113624 -1.110775 -0.795605

6 8.126428 -1.643933 -2.085640

1 7.149470 -2.977980 -3.470289

1 5.393244 -3.654229 -1.846831

1 7.096957 -1.032354 1.091772

1 8.878942 -0.401294 -0.493028

1 8.901327 -1.351355 -2.789058

5 4.935598 -2.792869 0.700688

8 4.518251 -1.979008 1.732434

8 4.281967 -3.972398 0.486509

1 3.452425 -3.987622 0.991767

1 4.883369 -1.038748 1.740892

----------------------------------------------------------------------------------------------------------------

**A11**

----------------------------------------------------------------------------------------------------------------

Number of imaginary frequencies: 0

Electronic energy: HF=-3798.0257866

Zero-point correction = 0.993135 (Hartree/Particle)

Thermal correction to Energy = 1.062405

Thermal correction to Enthalpy = 1.063349

Thermal correction to Gibbs Free Energy = 0.884512

Sum of electronic and zero-point Energies = -3797.032651

Sum of electronic and thermal Energies = -3796.963382

Sum of electronic and thermal Enthalpies = -3796.962437

Sum of electronic and thermal Free Energies = -3797.141274

......................................................................................................................................................

Cartesian Coordinates

......................................................................................................................................................

45 -2.262396 0.439016 -0.316584

45 -3.848090 2.117194 -1.151295

26 3.688639 -2.161286 -1.506924

15 -0.796023 -1.419507 0.355179

15 2.313493 0.529048 0.400969

8 -0.770487 1.833132 -0.737231

8 -3.910474 -0.730431 0.072892

8 -2.521308 1.333232 1.528766

8 -4.107540 2.770580 0.782814

8 -2.276715 3.424405 -1.330101

8 -5.350101 0.727078 -0.901691

6 1.883661 -2.106485 -0.460091

6 -2.679495 -3.218699 -0.645907

6 2.706885 0.946501 2.152547

6 -1.720022 -3.881648 1.467192

1 -1.054977 -3.696171 2.302267

6 3.737583 -3.336598 0.178020

1 4.433044 -4.155737 0.300167

6 -1.777219 -2.976201 0.401870

6 1.523729 -2.254204 3.695921

6 0.537791 -1.707086 -0.990327

1 0.626489 -0.702520 -1.406159

6 -0.399387 -0.382161 2.897230

1 -1.127358 0.354720 2.587699

6 -3.492511 -4.352396 -0.651337

6 -3.374574 2.268894 1.685630

6 0.014977 -1.370243 1.999776

6 -5.066760 -0.362261 -0.317440

6 2.449362 -3.416873 -0.432475

1 1.997277 -4.309444 -0.840492

6 0.118954 -0.326149 4.198455

6 0.969401 -2.315236 2.418779

1 1.296028 -3.097764 1.747840

6 3.621473 -1.196616 -3.347612

1 2.865904 -0.481908 -3.636457

6 1.983514 2.053760 2.719807

6 -0.375775 0.726966 5.157796

1 0.330160 0.881609 5.977852

1 -1.339553 0.437260 5.594579

1 -0.517300 1.683563 4.649511

6 0.048333 -2.631022 -2.109352

1 -0.142294 -3.645677 -1.752904

1 0.819992 -2.674043 -2.881550

1 -0.865744 -2.241191 -2.553771

6 4.745375 -3.178114 -2.964540

1 4.978132 -4.232459 -2.906152

6 3.281896 1.948266 -1.838766

6 2.016052 1.723148 -2.447484

1 1.226257 1.271954 -1.859998

6 -3.406317 -5.246482 0.422576

1 -4.047058 -6.125850 0.435654

6 -4.442542 -4.603752 -1.798068

1 -3.960827 -5.186026 -2.593385

1 -4.782335 -3.663505 -2.242970

1 -5.323859 -5.164919 -1.473312

6 4.837699 1.796925 0.024995

1 5.069633 1.486489 1.038368

6 5.553458 2.883075 -2.016166

1 6.308331 3.399221 -2.602996

6 3.308140 1.816234 4.781512

1 3.550210 2.164109 5.782180

6 -3.496499 2.814671 3.088210

1 -3.792765 2.009324 3.766312

1 -4.227592 3.621955 3.124822

1 -2.517549 3.175053 3.416803

6 0.633414 4.259063 3.875713

1 0.116171 5.112562 4.303749

6 1.635893 3.631573 4.579044

1 1.911893 3.975396 5.572344

6 3.932710 0.713765 4.250543

1 4.671907 0.169587 4.831256

6 5.535992 -2.112032 -2.439918

1 6.473152 -2.217254 -1.910775

6 0.259228 3.773009 2.599873

1 -0.557226 4.243639 2.059728

6 0.915917 2.700310 2.038836

1 0.588564 2.306811 1.084060

6 4.843044 -0.890056 -2.674521

1 5.168913 0.088868 -2.361760

6 -6.197324 -1.319687 -0.024649

1 -5.826031 -2.345621 -0.013400

1 -6.995836 -1.197399 -0.757842

1 -6.602657 -1.091435 0.966844

6 4.286774 2.629725 -2.604087

6 2.769299 2.768797 -4.502341

1 2.562683 3.073383 -5.523770

6 5.818749 2.484531 -0.726180

1 6.787400 2.688739 -0.279404

6 3.984001 -1.972834 0.511392

1 4.904005 -1.584890 0.922680

6 2.831516 -1.201768 0.142934

6 3.595960 1.508016 -0.508192

6 1.082676 -1.257837 4.577394

1 1.514973 -1.201621 5.573759

6 -2.527498 -5.025632 1.485903

6 3.637002 0.288915 2.934073

1 4.154296 -0.575833 2.542575

6 2.612424 -3.213300 4.107883

1 3.578269 -2.696393 4.166115

1 2.718900 -4.028112 3.387026

1 2.418323 -3.647796 5.094251

6 3.564816 -2.609923 -3.529758

1 2.754842 -3.162691 -3.984332

6 -1.100948 3.018533 -1.083821

6 0.005076 4.037730 -1.232310

1 0.885340 3.755098 -0.657059

1 -0.361718 5.017068 -0.919983

1 0.292721 4.099893 -2.285395

6 -2.430397 -6.007784 2.628565

1 -3.375652 -6.536400 2.782867

1 -2.164255 -5.505167 3.562992

1 -1.660611 -6.765427 2.435404

6 2.320300 2.511011 4.036189

6 1.766725 2.120155 -3.742502

1 0.786994 1.944564 -4.178301

6 3.997730 3.023773 -3.938241

1 4.771435 3.531870 -4.507405

1 -2.772801 -2.497378 -1.448287

8 -2.152605 -0.262280 -2.262501

8 -3.489184 1.393379 -3.049889

6 -2.746855 0.380547 -3.194860

6 -2.514256 -0.131180 -4.597287

1 -1.457062 -0.010048 -4.853401

1 -3.130720 0.414136 -5.311378

1 -2.740850 -1.199858 -4.641753

----------------------------------------------------------------------------------------------------------------

**A12**

----------------------------------------------------------------------------------------------------------------

Number of imaginary frequencies: 0

Electronic energy: HF = -4053.6934541

Zero-point correction = 1.082383 (Hartree/Particle)

Thermal correction to Energy = 1.156970

Thermal correction to Enthalpy = 1.157914

Thermal correction to Gibbs Free Energy = 0.971910

Sum of electronic and zero-point Energies = -4052.611071

Sum of electronic and thermal Energies = -4052.536484

Sum of electronic and thermal Enthalpies = -4052.535540

Sum of electronic and thermal Free Energies = -4052.721544

......................................................................................................................................................

Cartesian Coordinates

......................................................................................................................................................

45 0.327202 -0.557332 -0.157753

45 2.664274 -1.464957 -0.318415

26 -3.373176 2.274994 -2.066773

15 0.663509 1.706164 0.182817

15 -2.071104 -0.178386 0.076611

8 0.432113 -1.147462 1.824760

8 -0.171012 -2.594744 -0.550243

8 0.497823 -0.214772 -2.219301

8 2.738034 -0.613143 -2.211847

8 2.303248 -2.382805 1.489037

8 1.875898 -3.096370 -1.317107

6 -1.884717 2.606747 -0.695812

6 2.862536 2.342382 -1.396893

6 -2.498871 -0.403262 1.850454

6 3.062517 3.002649 0.917784

1 2.653623 3.059491 1.920409

6 -4.074736 3.335498 -0.424904

1 -4.954103 3.964424 -0.439220

6 2.316472 2.426791 -0.113799

6 -0.914036 3.923124 3.296262

6 -0.419958 2.608422 -1.072886

1 -0.300897 1.953005 -1.940703

6 0.583408 1.580215 2.961215

1 1.125120 0.655048 2.828355

6 4.154808 2.795955 -1.661150

6 1.651362 -0.328663 -2.778981

6 0.189759 2.316371 1.838518

6 0.655744 -3.363972 -1.131024

6 -2.751330 3.744304 -0.758665

1 -2.465209 4.738480 -1.066673

6 0.224248 1.984212 4.249872

6 -0.549070 3.493366 2.017237

1 -0.866535 4.078438 1.165507

6 -2.741874 1.142300 -3.671872

1 -1.941118 0.421134 -3.599783

6 -2.478465 -1.701061 2.465252

6 0.570642 1.121383 5.436151

1 0.616454 1.703374 6.360957

1 1.532638 0.619337 5.297950

1 -0.192657 0.344394 5.566921

6 0.062632 4.011460 -1.469712

1 0.033425 4.715650 -0.634630

1 -0.578237 4.399342 -2.267011

1 1.085400 3.988122 -1.839775

6 -3.874025 3.145660 -3.875406

1 -4.084596 4.198876 -3.999900

6 -4.493846 -1.636538 -0.684313

6 -5.223439 -1.210919 0.459940

1 -4.730017 -0.609967 1.209783

6 4.885934 3.363767 -0.612152

1 5.897293 3.717576 -0.800827

6 4.753747 2.606965 -3.032199

1 5.670198 3.189821 -3.156587

1 4.052781 2.901206 -3.820702

1 4.998394 1.549806 -3.188527

6 -2.505426 -1.766258 -2.090128

1 -1.472504 -1.505131 -2.278073

6 -4.502069 -2.920564 -2.797767

1 -5.041676 -3.543524 -3.505777

6 -2.931345 -0.615542 4.634208

1 -3.104084 -0.705247 5.703404

6 1.689051 -0.086583 -4.270499

1 1.563357 -1.046894 -4.781899

1 2.660026 0.320672 -4.556399

1 0.881434 0.579393 -4.579974

6 -2.489617 -4.217159 3.768329

1 -2.494059 -5.187888 4.254661

6 -2.714116 -3.073326 4.498737

1 -2.896652 -3.127316 5.568634

6 -2.923346 0.615062 4.024630

1 -3.075954 1.520722 4.601985

6 -4.823009 2.132830 -3.543303

1 -5.878811 2.286308 -3.367702

6 -2.241594 -4.123698 2.379077

1 -2.044786 -5.023967 1.804714

6 -2.235801 -2.900460 1.745548

1 -2.000322 -2.859399 0.691744

6 -4.126419 0.896048 -3.414878

1 -4.559771 -0.050510 -3.131261

6 0.131420 -4.696630 -1.610229

1 -0.017050 -5.347416 -0.742078

1 0.842497 -5.168902 -2.288402

1 -0.838999 -4.563268 -2.094610

6 -5.182094 -2.463726 -1.638685

6 -7.213597 -2.371127 -0.301108

1 -8.252228 -2.643718 -0.142061

6 -3.190427 -2.577214 -3.020583

1 -2.673136 -2.920178 -3.911384

6 -4.047482 1.944565 -0.147645

1 -4.895102 1.328339 0.107254

6 -2.694361 1.480726 -0.293506

6 -3.124483 -1.292283 -0.945405

6 -0.523033 3.155915 4.399508

1 -0.815579 3.475166 5.397548

6 4.359184 3.466062 0.681766

6 -2.708059 0.718778 2.632168

1 -2.698169 1.703284 2.183878

6 -1.699727 5.199183 3.476773

1 -2.338652 5.152420 4.363449

1 -2.335049 5.398667 2.608814

1 -1.032259 6.060571 3.600792

6 -2.587741 2.530321 -3.959103

1 -1.652985 3.036972 -4.156757

6 1.299577 -2.022475 2.169273

6 1.086356 -2.662958 3.516777

1 0.852506 -1.892642 4.255712

1 1.971469 -3.224102 3.815304

1 0.219743 -3.327581 3.457201

6 5.216208 3.957856 1.818203

1 5.820364 3.117804 2.179985

1 4.610626 4.329326 2.649692

1 5.895849 4.754429 1.500583

6 -2.712753 -1.796745 3.876682

6 -6.541068 -1.565091 0.645459

1 -7.065446 -1.226482 1.533865

6 -6.541720 -2.810471 -1.416533

1 -7.040838 -3.434837 -2.152577

1 2.287342 1.912500 -2.205209

6 5.132929 -3.614565 -1.376065

6 5.030596 -2.775585 -0.254588

6 5.414361 -1.416947 -0.313435

6 5.932609 -0.952430 -1.537043

6 6.039158 -1.778954 -2.651428

6 5.626692 -3.115865 -2.577211

1 4.820630 -4.652711 -1.302514

1 4.697115 -3.182680 0.695597

1 6.262266 0.081611 -1.608166

1 6.443268 -1.390075 -3.583511

1 5.704524 -3.760747 -3.448353

5 5.173803 -0.426162 0.956843

8 5.981307 0.766080 0.992030

8 3.643784 0.012319 0.725185

1 5.764762 1.328105 0.240944

8 5.193422 -1.086148 2.240149

1 5.844440 -0.624666 2.779496

1 3.294281 0.032602 1.627161

----------------------------------------------------------------------------------------------------------------

**A13**

----------------------------------------------------------------------------------------------------------------Number of imaginary frequencies: 0

Electronic energy: HF = -3798.0472645

Zero-point correction = 0.994130 (Hartree/Particle)

Thermal correction to Energy = 1.062887

Thermal correction to Enthalpy = 1.063831

Thermal correction to Gibbs Free Energy = 0.889511

Sum of electronic and zero-point Energies = -3797.053135

Sum of electronic and thermal Energies = -3796.984378

Sum of electronic and thermal Enthalpies = -3796.983433

Sum of electronic and thermal Free Energies = -3797.157753

......................................................................................................................................................

Cartesian Coordinates

......................................................................................................................................................

45 -0.393842 0.327535 -0.828905

45 -2.363402 1.111943 -2.151151

26 2.489101 -3.203774 1.199858

15 -1.438052 -0.748301 0.922231

15 1.760200 0.070132 0.192448

8 -0.518307 2.162201 0.086056

8 0.672907 1.267451 -2.436051

8 -0.499863 -1.423665 -1.980210

8 -2.521167 -0.837951 -2.853578

8 -1.945711 3.007986 -1.463906

8 -1.119382 1.398831 -3.780134

6 0.933973 -2.089071 1.949068

6 -3.098769 -2.616706 -0.323639

6 2.082656 1.591214 1.178813

6 -4.210565 -1.203292 1.286701

1 -4.198977 -0.383675 1.992137

6 2.904760 -2.507969 3.114315

1 3.620055 -2.960438 3.787005

6 -3.053904 -1.555941 0.594886

6 -1.052262 0.999594 4.633490

6 -0.484806 -2.284297 1.454667

1 -0.421043 -2.798418 0.490203

6 -2.500623 1.426329 2.268292

1 -3.058059 1.583247 1.350057

6 -4.288887 -3.294116 -0.580209

6 -1.522035 -1.598681 -2.741399

6 -1.647823 0.320425 2.378233

6 0.120258 1.505056 -3.552790

6 1.529451 -2.859271 3.000832

1 1.035404 -3.624210 3.579027

6 -2.652580 2.313220 3.336285

6 -0.929784 0.109563 3.561488

1 -0.256425 -0.733874 3.657440

6 2.179398 -3.799773 -0.750020

1 1.581871 -3.230029 -1.447539

6 2.352110 2.861955 0.567376

6 -3.589514 3.487497 3.190780

1 -3.994459 3.802416 4.157160

1 -4.418723 3.231232 2.525121

1 -3.072568 4.350588 2.753352

6 -1.282820 -3.182957 2.415956

1 -1.366894 -2.732876 3.407923

1 -0.779075 -4.148660 2.516444

1 -2.286726 -3.370730 2.042659

6 2.781752 -5.237894 0.955759

1 2.725617 -5.957603 1.760668

6 4.518404 0.076157 -0.782149

6 5.029290 0.710608 0.383945

1 4.345047 1.030607 1.156321

6 -5.445391 -2.898744 0.105952

1 -6.382919 -3.412721 -0.093915

6 -4.340270 -4.403412 -1.602017

1 -5.011132 -5.208537 -1.287002

1 -3.349848 -4.834091 -1.775816

1 -4.709894 -4.030451 -2.565129

6 2.734494 -0.808140 -2.192079

1 1.685062 -1.011295 -2.360674

6 5.008009 -0.919558 -2.991997

1 5.739389 -1.194121 -3.747180

6 2.229369 3.897569 2.804589

1 2.283154 4.790164 3.421899

6 -1.499473 -2.848626 -3.590564

1 -0.962408 -2.627555 -4.519398

1 -2.516017 -3.149148 -3.844838

1 -0.974292 -3.657557 -3.078789

6 2.874961 5.417806 -0.538880

1 3.075193 6.391279 -0.975999

6 2.704897 5.288033 0.820211

1 2.766252 6.156231 1.470798

6 1.959087 2.673046 3.362468

1 1.789761 2.575185 4.429765

6 3.947927 -4.524738 0.546033

1 4.930105 -4.606939 0.990639

6 2.783798 4.276013 -1.367596

1 2.909828 4.378162 -2.441318

6 2.534721 3.032743 -0.829053

1 2.437150 2.184656 -1.490467

6 3.578493 -3.634582 -0.504483

1 4.229017 -2.929292 -0.998682

6 1.022388 1.964598 -4.673952

1 1.337305 2.993305 -4.469447

1 0.498650 1.936827 -5.629716

1 1.921013 1.343402 -4.706217

6 5.463031 -0.297831 -1.800164

6 7.300676 0.562611 -0.455745

1 8.360232 0.753662 -0.317331

6 3.670495 -1.167889 -3.185425

1 3.323300 -1.645657 -4.096374

6 3.184830 -1.515272 2.142220

1 4.143051 -1.057837 1.954992

6 1.972206 -1.235418 1.420133

6 3.128975 -0.208959 -1.007064

6 -1.915444 2.092863 4.505434

1 -2.018959 2.785755 5.338176

6 -5.423595 -1.861140 1.038284

6 1.893738 1.521764 2.547050

1 1.677932 0.571726 3.014481

6 -0.280228 0.764981 5.909741

1 -0.027944 1.708986 6.402375

1 0.650409 0.221511 5.717620

1 -0.861503 0.171213 6.625870

6 1.689773 -4.791473 0.150690

1 0.660906 -5.112257 0.244022

6 -1.182491 3.107808 -0.458559

6 -0.995754 4.466248 0.167894

1 -0.962502 4.362081 1.254325

1 -1.798432 5.139181 -0.134411

1 -0.032844 4.874633 -0.154545

6 -6.676486 -1.397299 1.733940

1 -6.915205 -0.384862 1.391700

1 -6.536584 -1.354716 2.819518

1 -7.521756 -2.058177 1.523106

6 2.436782 4.022600 1.405761

6 6.376720 0.945135 0.543211

1 6.730423 1.437064 1.444162

6 6.846591 -0.042938 -1.602749

1 7.541108 -0.337465 -2.384788

1 -2.196344 -2.934998 -0.830213

8 -5.633020 1.329788 0.324171

8 -3.619536 1.084798 -0.569041

6 -4.922632 1.003596 -0.628819

6 -5.514307 0.443429 -1.914323

1 -6.600549 0.384997 -1.832152

1 -5.096152 -0.548817 -2.106013

1 -5.250618 1.078688 -2.768367

----------------------------------------------------------------------------------------------------------------

**A14**

----------------------------------------------------------------------------------------------------------------

Number of imaginary frequencies: 0

Electronic energy: HF=-5033.1677881

Zero-point correction = 0.960850 (Hartree/Particle)

Thermal correction to Energy = 1.032744

Thermal correction to Enthalpy = 1.033688

Thermal correction to Gibbs Free Energy = 0.850399

Sum of electronic and zero-point Energies = -5032.206938

Sum of electronic and thermal Energies = -5032.135044

Sum of electronic and thermal Enthalpies = -5032.134100

Sum of electronic and thermal Free Energies = -5032.317389

......................................................................................................................................................

Cartesian Coordinates

......................................................................................................................................................

45 0.275288 -0.717783 -0.401003

45 2.486640 -1.787199 -0.924998

26 -3.405267 2.465845 -1.743286

15 0.799551 1.504367 0.013315

15 -2.065164 -0.157191 0.160243

8 0.604678 -1.419606 1.517263

8 -0.440272 -2.670778 -0.796183

8 0.185546 -0.286974 -2.448229

8 2.356656 -0.860886 -2.794396

8 2.360509 -2.723794 0.910484

8 1.440043 -3.314147 -1.829604

6 -1.737261 2.628769 -0.567340

6 3.257035 1.810104 -1.348099

6 -2.288673 -0.425981 1.966317

6 2.910169 3.338367 0.492526

1 2.293397 3.721008 1.298079

6 -3.802116 3.529842 -0.004411

1 -4.619116 4.229479 0.104391

6 2.451517 2.271694 -0.303559

6 -0.294123 3.649394 3.385282

6 -0.333438 2.511983 -1.112409

1 -0.367470 1.855651 -1.986321

6 0.995995 1.236534 2.775649

1 1.430204 0.274495 2.536290

6 4.529197 2.352841 -1.574204

6 1.219039 -0.464403 -3.184893

6 0.503766 2.041487 1.739320

6 0.231657 -3.487998 -1.497062

6 -2.500692 3.837528 -0.497353

1 -2.170164 4.812832 -0.822271

6 0.835151 1.608511 4.112699

6 -0.132268 3.247889 2.053256

1 -0.525410 3.880756 1.268878

6 -3.097404 1.344866 -3.448900

1 -2.363118 0.555619 -3.510126

6 -2.257851 -1.746502 2.531069

6 1.253708 0.674028 5.219967

1 1.553464 1.215919 6.121546

1 2.083208 0.028772 4.912875

1 0.415909 0.019049 5.487475

6 0.238398 3.861670 -1.561576

1 0.379824 4.556354 -0.729194

1 -0.447743 4.322004 -2.277914

1 1.203321 3.734037 -2.052880

6 -4.067500 3.440686 -3.445282

1 -4.201552 4.511225 -3.515066

6 -4.665593 -1.399019 -0.329611

6 -5.213135 -0.960122 0.907193

1 -4.588026 -0.422091 1.604351

6 4.962690 3.415659 -0.772340

1 5.945637 3.848943 -0.946700

6 5.444096 1.715013 -2.589186

1 6.144959 2.436616 -3.018578

1 4.877015 1.247563 -3.397964

1 6.025396 0.924273 -2.098584

6 -2.887071 -1.619594 -1.985223

1 -1.871053 -1.424249 -2.300200

6 -5.039226 -2.597899 -2.460909

1 -5.710585 -3.151751 -3.110992

6 -2.394626 -0.726981 4.774480

1 -2.445756 -0.850446 5.852954

6 1.047009 -0.170666 -4.655389

1 0.740910 -1.093369 -5.160101

1 1.994480 0.151337 -5.089914

1 0.272010 0.580970 -4.814191

6 -2.227707 -4.308042 3.743794

1 -2.221515 -5.295427 4.194950

6 -2.297527 -3.183878 4.533567

1 -2.347511 -3.270961 5.615480

6 -2.418540 0.524448 4.208666

1 -2.479112 1.411645 4.830144

6 -5.047471 2.498786 -3.012080

1 -6.053029 2.732882 -2.691273

6 -2.165301 -4.172947 2.337082

1 -2.104677 -5.059505 1.713024

6 -2.179702 -2.927766 1.747683

1 -2.099991 -2.857725 0.672641

6 -4.450734 1.204995 -3.011045

1 -4.923774 0.287772 -2.696099

6 -0.465608 -4.750851 -1.937344

1 -0.551997 -5.422579 -1.076820

1 0.102205 -5.252733 -2.720977

1 -1.477057 -4.517548 -2.278016

6 -5.529806 -2.137554 -1.211237

6 -7.366213 -1.944117 0.374193

1 -8.394842 -2.144645 0.656074

6 -3.744523 -2.341125 -2.843125

1 -3.374353 -2.683369 -3.804594

6 -3.862250 2.133138 0.239095

1 -4.722766 1.583057 0.586303

6 -2.583618 1.560932 -0.086342

6 -3.316604 -1.149061 -0.755288

6 0.194582 2.819818 4.399850

1 0.054609 3.113678 5.437591

6 4.156930 3.934673 0.253826

6 -2.364456 0.671948 2.804686

1 -2.381258 1.670206 2.389327

6 -0.976453 4.956328 3.707019

1 -1.408699 4.944260 4.711004

1 -1.776704 5.169530 2.992388

1 -0.269032 5.793136 3.665144

6 -2.862796 2.724839 -3.719782

1 -1.924573 3.159439 -4.036701

6 1.464602 -2.339922 1.721249

6 1.379928 -3.018554 3.066079

1 1.281307 -2.268821 3.855338

1 2.250948 -3.650911 3.239391

1 0.469894 -3.625137 3.091509

6 4.607930 5.125267 1.067301

1 4.110544 5.157925 2.041272

1 4.370558 6.062037 0.549876

1 5.689995 5.116345 1.231738

6 -2.316363 -1.885922 3.957393

6 -6.521345 -1.222753 1.247881

1 -6.904838 -0.876370 2.202667

6 -6.873944 -2.391797 -0.828170

1 -7.507583 -2.950407 -1.511262

1 2.941660 0.967156 -1.944416

6 4.958493 -1.184721 -0.300501

8 6.066635 -0.765874 0.193082

8 3.841371 -0.543547 -0.012590

8 4.858367 -2.211968 -1.064230

19 4.811759 0.853143 1.866317

19 7.319200 -2.703455 -1.036368

----------------------------------------------------------------------------------------------------------------

**A15**

----------------------------------------------------------------------------------------------------------------

Number of imaginary frequencies: 0

Electronic energy: HF = -4053.670289

Zero-point correction = 1.082243 (Hartree/Particle)

Thermal correction to Energy = 1.156916

Thermal correction to Enthalpy =1.157860

Thermal correction to Gibbs Free Energy = 0.971720

Sum of electronic and zero-point Energies = -4052.588046

Sum of electronic and thermal Energies = -4052.513373

Sum of electronic and thermal Enthalpies = -4052.512429

Sum of electronic and thermal Free Energies = -4052.698569

......................................................................................................................................................

Cartesian Coordinates

......................................................................................................................................................

45 0.407804 -0.547483 -0.403529

45 2.682787 -1.452892 -1.064436

26 -3.492020 2.521304 -1.517203

15 0.726722 1.637329 0.290848

15 -2.011599 -0.216517 0.122110

8 0.758756 -1.515999 1.392826

8 -0.184961 -2.488547 -1.069896

8 0.344819 0.146641 -2.393963

8 2.555544 -0.234861 -2.755846

8 2.489289 -2.720421 0.542333

8 1.687119 -2.776664 -2.258705

6 -1.873129 2.644512 -0.261017

6 3.048806 2.417458 -1.065587

6 -2.328227 -0.717788 1.863701

6 2.765216 3.429269 1.109339

1 2.201999 3.551272 2.027087

6 -4.012967 3.337252 0.317047

1 -4.878606 3.965572 0.475282

6 2.308325 2.557336 0.109676

6 -0.671044 3.357661 3.781437

6 -0.451492 2.677498 -0.767389

1 -0.420810 2.116944 -1.704899

6 0.637756 1.004093 3.003220

1 1.093970 0.073624 2.696077

6 4.260421 3.097831 -1.247167

6 1.401367 0.137866 -3.117171

6 0.276111 1.947105 2.037547

6 0.507722 -3.105746 -1.926871

6 -2.719006 3.783711 -0.080829

1 -2.443186 4.809792 -0.273192

6 0.359631 1.219856 4.357613

6 -0.373734 3.124954 2.437029

1 -0.660703 3.868112 1.705160

6 -3.031104 1.650968 -3.331660

1 -2.229138 0.937926 -3.451810

6 -2.235179 -2.094087 2.264157

6 0.707634 0.158687 5.370155

1 0.669959 0.547091 6.391641

1 1.709792 -0.244661 5.194128

1 0.000431 -0.675497 5.298914

6 0.033271 4.103141 -1.059499

1 0.123979 4.711251 -0.155577

1 -0.674691 4.593718 -1.734112

1 1.009975 4.091062 -1.542177

6 -4.173778 3.646407 -3.114215

1 -4.393867 4.703447 -3.056236

6 -4.497725 -1.572707 -0.654232

6 -5.135063 -1.333221 0.594572

1 -4.587340 -0.837902 1.382277

6 4.695308 3.954542 -0.234157

1 5.637719 4.483476 -0.357103

6 5.093896 2.820829 -2.471295

1 5.915852 3.535989 -2.564800

1 4.488667 2.871516 -3.382897

1 5.510148 1.805982 -2.411326

6 -2.640098 -1.440835 -2.225992

1 -1.631827 -1.126634 -2.460043

6 -4.680151 -2.515326 -2.934095

1 -5.274531 -3.032426 -3.682315

6 -2.665109 -1.388895 4.588856

1 -2.802786 -1.654395 5.633639

6 1.247563 0.628946 -4.537264

1 1.018874 -0.228638 -5.179267

1 2.183872 1.068906 -4.883727

1 0.428422 1.346099 -4.614287

6 -2.090011 -4.781964 3.148934

1 -2.032187 -5.816191 3.474488

6 -2.332934 -3.779934 4.059451

1 -2.470315 -4.010799 5.112457

6 -2.727170 -0.078385 4.182567

1 -2.900855 0.716094 4.900841

6 -5.085708 2.582481 -2.843811

1 -6.117662 2.693459 -2.540653

6 -1.910206 -4.459648 1.783569

1 -1.705224 -5.248231 1.065734

6 -1.980923 -3.152921 1.353571

1 -1.800588 -2.936790 0.310509

6 -4.382248 1.350061 -2.975053

1 -4.786290 0.366109 -2.794515

6 -0.096721 -4.320789 -2.584883

1 -0.053628 -5.155194 -1.877028

1 0.462490 -4.593690 -3.480160

1 -1.146596 -4.132645 -2.820373

6 -5.259439 -2.258169 -1.664296

6 -7.173036 -2.406935 -0.167283

1 -8.192903 -2.720426 0.032744

6 -3.397449 -2.108971 -3.212146

1 -2.958787 -2.293120 -4.188163

6 -3.985112 1.919866 0.390048

1 -4.816051 1.277053 0.635259

6 -2.659712 1.475917 0.053647

6 -3.156234 -1.168061 -0.970058

6 -0.293796 2.396226 4.729008

1 -0.524702 2.568101 5.778227

6 3.959806 4.133773 0.945007

6 -2.553615 0.255453 2.821138

1 -2.594269 1.298385 2.536476

6 -1.360807 4.631960 4.204332

1 -2.036283 4.458527 5.047430

1 -1.944381 5.057150 3.382861

1 -0.634427 5.390323 4.521042

6 -2.904292 3.068122 -3.420802

1 -1.994110 3.611002 -3.635665

6 1.628374 -2.451285 1.432265

6 1.602534 -3.313172 2.669211

1 1.669926 -2.671736 3.551745

1 2.432151 -4.019231 2.658808

1 0.647171 -3.842788 2.717242

6 4.465201 5.056009 2.027651

1 5.409821 4.690650 2.445888

1 3.746757 5.138860 2.847548

1 4.652682 6.062545 1.637794

6 -2.413432 -2.422847 3.648755

6 -6.430512 -1.735687 0.830636

1 -6.882666 -1.539902 1.798199

6 -6.593064 -2.661509 -1.386780

1 -7.147535 -3.177478 -2.165940

1 2.731798 1.724555 -1.830857

6 3.750299 0.024035 1.596435

6 4.289637 -0.241847 0.317202

6 5.232233 -1.283516 0.123067

6 5.573732 -2.059468 1.240829

6 5.018303 -1.814829 2.492779

6 4.098211 -0.769614 2.677374

1 3.088991 0.865697 1.737836

1 4.175213 0.501101 -0.464720

1 6.296283 -2.859680 1.108972

1 5.301940 -2.432435 3.342354

1 3.685137 -0.568911 3.662027

5 5.758292 -1.636083 -1.379790

8 6.899049 -2.523978 -1.432824

1 6.575053 -3.430069 -1.402276

8 6.017548 -0.421954 -2.140660

1 6.825844 -0.586136 -2.639470

8 4.516338 -2.359064 -1.954417

1 4.448921 -2.109838 -2.887222

----------------------------------------------------------------------------------------------------------------

**A16**

----------------------------------------------------------------------------------------------------------------

Number of imaginary frequencies: 0

Electronic energy: HF = -6460.6605986

Zero-point correction = 1.773691 (Hartree/Particle)

Thermal correction to Energy = 1.891089

Thermal correction to Enthalpy = 1.892033

Thermal correction to Gibbs Free Energy = 1.607826

Sum of electronic and zero-point Energies = -6458.886907

Sum of electronic and thermal Energies = -6458.769510

Sum of electronic and thermal Enthalpies = -6458.768565

Sum of electronic and thermal Free Energies = -6459.052773

......................................................................................................................................................

Cartesian Coordinates

......................................................................................................................................................

45 1.015544 0.586054 -0.262494

45 -1.299288 -0.217524 0.076175

8 1.483285 -0.359319 1.524467

8 0.337055 1.427672 -2.030107

8 1.354838 -1.194665 -1.267674

8 -0.748177 -1.936205 -0.910567

8 -0.651861 -1.074800 1.811472

8 -1.800440 0.763853 -1.698975

6 0.425188 -2.055243 -1.378998

6 -0.880027 1.329363 -2.369564

6 0.726537 -3.327660 -2.125627

1 1.677539 -3.251090 -2.650344

1 -0.087099 -3.539382 -2.822439

1 0.785550 -4.152499 -1.410655

6 -1.254635 1.918706 -3.709541

1 -0.623213 2.780701 -3.928508

1 -2.309789 2.195564 -3.726152

1 -1.081868 1.163063 -4.483578

6 0.563817 -0.974313 2.159033

6 0.938589 -1.637339 3.463794

1 1.927810 -2.092260 3.396089

1 0.185582 -2.377588 3.732633

1 0.991017 -0.875540 4.247808

8 0.531187 2.237421 0.865163

8 -1.578185 1.493245 1.207915

6 -0.627899 2.307462 1.390934

6 -0.886500 3.491670 2.291349

1 0.038574 3.803593 2.779327

1 -1.648374 3.243031 3.030374

1 -1.262068 4.320211 1.684641

26 7.516459 0.906937 0.933067

15 3.150379 1.796430 -1.007012

15 4.591226 -1.071685 0.465759

6 5.875427 1.351374 -0.273024

6 2.045867 4.330538 -0.515435

6 4.551852 -2.483980 -0.714689

6 2.506744 3.887777 -2.839450

1 2.855478 3.225944 -3.623020

6 7.957425 0.711231 -1.067926

1 8.966100 0.759312 -1.455223

6 2.547149 3.470715 -1.503169

6 5.547237 1.366620 -4.355150

6 4.676036 2.178096 0.115568

1 4.335109 1.830579 1.095089

6 3.353680 0.060398 -3.194265

1 2.524715 -0.457871 -2.732578

6 1.562775 5.601453 -0.835410

6 3.897650 1.184973 -2.570531

6 7.089333 1.823817 -0.859991

1 7.330994 2.854868 -1.072557

6 3.877065 -0.414351 -4.405680

6 4.980508 1.844400 -3.174093

1 5.383425 2.745241 -2.726616

6 7.195598 1.178041 2.972131

1 6.224900 1.174044 3.443799

6 3.738917 -3.620739 -0.381288

6 3.249622 -1.613297 -5.073456

1 3.701790 -1.811295 -6.049616

1 2.174625 -1.463617 -5.221718

1 3.368880 -2.510460 -4.457038

6 5.035836 3.664615 0.225821

1 5.239709 4.111346 -0.751009

1 5.929200 3.769192 0.846547

1 4.233159 4.242467 0.680480

6 9.094544 1.872258 1.856067

1 9.807239 2.488806 1.325669

6 4.981189 -1.375491 3.252588

6 4.083415 -0.285310 3.432633

1 3.562385 0.111044 2.569342

6 1.573257 6.005680 -2.174148

1 1.200659 6.994278 -2.434905

6 0.984452 6.489816 0.238844

1 1.069596 7.548030 -0.026179

1 1.487839 6.336529 1.198125

1 -0.079589 6.273169 0.392224

6 6.165117 -2.985177 1.867537

1 6.399654 -3.397907 0.891822

6 6.467280 -3.057369 4.267032

1 6.919114 -3.491065 5.154943

6 4.456576 -4.706205 -2.470275

1 4.438668 -5.569588 -3.129749

6 2.247684 -5.933584 0.282196

1 1.681309 -6.819269 0.554110

6 2.978457 -5.907289 -0.884101

1 2.987100 -6.766565 -1.549393

6 5.157953 -3.573799 -2.809936

1 5.697538 -3.524219 -3.751095

6 9.192567 0.463533 2.064281

1 9.992168 -0.175326 1.715079

6 2.219250 -4.793563 1.120176

1 1.627858 -4.800773 2.028677

6 2.936209 -3.666868 0.789315

1 2.873597 -2.790950 1.421980

6 8.020895 0.034673 2.751741

1 7.782964 -0.981980 3.020977

6 5.589251 -1.952984 4.417686

6 4.455413 -0.327257 5.829550

1 4.251424 0.088677 6.811592

6 6.741132 -3.568533 3.018574

1 7.409483 -4.417689 2.909903

6 7.296104 -0.455412 -0.591365

1 7.698391 -1.457707 -0.573229

6 5.997061 -0.073178 -0.119023

6 5.310916 -1.902553 1.961408

6 4.979188 0.236439 -4.961395

1 5.402270 -0.132394 -5.893605

6 2.024677 5.154437 -3.187112

6 5.212463 -2.467062 -1.928958

1 5.789773 -1.599069 -2.219677

6 6.759831 2.041690 -4.947702

1 6.851660 1.837848 -6.018412

1 7.677726 1.686913 -4.462791

1 6.719858 3.126723 -4.809480

6 7.860827 2.312656 2.422723

1 7.484766 3.325925 2.410854

6 2.021274 5.603057 -4.629123

1 1.132181 6.198171 -4.860547

1 2.045450 4.747681 -5.310320

1 2.895511 6.226322 -4.854650

6 3.730748 -4.759210 -1.250645

6 3.831200 0.226151 4.685896

1 3.137564 1.054526 4.797816

6 5.306763 -1.399169 5.695254

1 5.781319 -1.840157 6.567720

1 2.000421 3.995387 0.513185

26 -6.650145 -0.912442 -2.216179

15 -4.560854 1.731663 1.066273

15 -3.829062 -1.515006 -0.019538

6 -6.242565 0.182397 -0.519572

6 -3.120697 3.616672 -0.346667

6 -4.050397 -2.041212 1.742003

6 -4.292357 4.566667 1.537136

1 -4.957020 4.456824 2.388056

6 -7.874682 -1.464294 -0.642761

1 -8.829482 -1.954598 -0.775159

6 -3.969764 3.450238 0.757386

6 -7.842058 1.503777 3.619768

6 -5.599023 1.540962 -0.497433

1 -4.804680 1.533829 -1.253377

6 -5.132025 2.177256 3.728369

1 -4.068467 2.399057 3.778106

6 -2.611153 4.871721 -0.688666

6 -5.721252 1.907128 2.479825

6 -7.647973 -0.058318 -0.635763

1 -8.402996 0.703803 -0.763640

6 -5.870792 2.132200 4.910665

6 -7.078609 1.568210 2.446245

1 -7.554661 1.318590 1.507157

6 -5.437247 -0.502449 -3.845925

1 -4.410801 -0.180621 -3.768503

6 -3.121112 -2.905349 2.416422

6 -5.207006 2.381713 6.243122

1 -5.902299 2.828012 6.960554

1 -4.346189 3.048842 6.141174

1 -4.842856 1.443568 6.679642

6 -6.557439 2.691025 -0.822817

1 -7.308256 2.833554 -0.041769

1 -7.079749 2.503773 -1.766960

1 -6.001448 3.625305 -0.916749

6 -7.744019 -0.482400 -3.915791

1 -8.769829 -0.140858 -3.894118

6 -3.191237 -3.175336 -2.268489

6 -2.700845 -2.023428 -2.939257

1 -2.711845 -1.071342 -2.428196

6 -2.940503 5.969547 0.116116

1 -2.547474 6.951827 -0.137172

6 -1.716910 5.019329 -1.894779

1 -1.367527 6.047488 -2.012491

1 -2.244996 4.737775 -2.812687

1 -0.832277 4.380749 -1.815078

6 -4.195923 -4.302832 -0.369448

1 -4.599545 -4.283174 0.636110

6 -3.627588 -5.600947 -2.327074

1 -3.582708 -6.545320 -2.862889

6 -4.348880 -2.497086 4.521297

1 -4.453597 -2.677658 5.588008

6 -1.449553 -4.730512 3.804786

1 -0.812113 -5.443077 4.320553

6 -2.441402 -4.064969 4.486290

1 -2.597048 -4.239730 5.547732

6 -5.217617 -1.665258 3.858386

1 -6.020257 -1.157108 4.384063

6 -7.311855 -1.842469 -3.947089

1 -7.954668 -2.711982 -3.951964

6 -1.254984 -4.473684 2.427463

1 -0.465856 -4.982421 1.886106

6 -2.047804 -3.568955 1.760816

1 -1.838249 -3.358683 0.721826

6 -5.887770 -1.857332 -3.902933

1 -5.261056 -2.734975 -3.879714

6 -3.142068 -4.429861 -2.963465

6 -2.149687 -3.339253 -4.900842

1 -1.749784 -3.387016 -5.909245

6 -4.144776 -5.537035 -1.055307

1 -4.516300 -6.432690 -0.566407

6 -6.614888 -2.105769 -0.531521

1 -6.443954 -3.170107 -0.541474

6 -5.586288 -1.103962 -0.437267

6 -3.732495 -3.131642 -0.942656

6 -7.228721 1.791805 4.840846

1 -7.813229 1.741576 5.757011

6 -3.771718 5.830184 1.234535

6 -5.078105 -1.463383 2.468119

1 -5.801826 -0.831893 1.973448

6 -9.308024 1.150459 3.548618

1 -9.678742 0.783821 4.510006

1 -9.492067 0.378426 2.794824

1 -9.913096 2.023371 3.274053

6 -6.581971 0.345599 -3.857513

1 -6.572340 1.424431 -3.789871

6 -4.088624 7.018893 2.109747

1 -3.328459 7.148398 2.890363

1 -5.052668 6.897422 2.612008

1 -4.119757 7.946671 1.530375

6 -3.303781 -3.152994 3.818976

6 -2.196421 -2.100716 -4.216382

1 -1.828863 -1.202677 -4.704159

6 -2.612276 -4.477157 -4.282735

1 -2.583073 -5.435452 -4.794399

1 -2.837796 2.750658 -0.936463

----------------------------------------------------------------------------------------------------------------

**A17**

----------------------------------------------------------------------------------------------------------------

Number of imaginary frequencies: 0

Electronic energy: HF = -3569.3548137

Zero-point correction = 0.942731 (Hartree/Particle)

Thermal correction to Energy = 1.006453

Thermal correction to Enthalpy = 1.007397

Thermal correction to Gibbs Free Energy = 0.842799

Sum of electronic and zero-point Energies = -3568.412082

Sum of electronic and thermal Energies = -3568.348361

Sum of electronic and thermal Enthalpies = -3568.347417

Sum of electronic and thermal Free Energies = -3568.512015

......................................................................................................................................................

Cartesian Coordinates

......................................................................................................................................................

45 -0.716412 0.030859 -0.734781

45 -3.106241 0.003672 -1.560972

26 2.651479 -2.733190 1.398096

15 -1.351507 -0.566505 1.358382

15 1.528393 0.239612 -0.042668

8 -1.033690 2.039504 -0.448358

8 -0.236246 0.498724 -2.762737

8 -0.641966 -1.990004 -1.238137

8 -2.750861 -1.956931 -2.094864

8 -3.207457 2.019428 -1.102656

8 -2.401809 0.565662 -3.380105

6 1.109354 -1.639839 2.180684

6 -3.265759 -2.591303 0.830625

6 1.706893 1.954065 0.567816

6 -4.009017 -0.296868 0.568757

1 -3.940771 0.741314 0.860244

6 3.246893 -1.682610 3.092533

1 4.089557 -1.950994 3.713928

6 -3.022266 -1.229251 0.998211

6 -0.515460 1.631390 4.726522

6 -0.352625 -1.997010 1.979068

1 -0.408814 -2.662648 1.112099

6 -2.134898 1.903244 2.455299

1 -2.743294 2.038841 1.573575

6 -4.465430 -3.050908 0.259194

6 -1.645079 -2.516043 -1.842191

6 -1.396406 0.724627 2.642364

6 -1.156409 0.701501 -3.606911

6 1.915028 -2.162278 3.242762

1 1.584081 -2.854544 4.001957

6 -2.077857 2.942792 3.383980

6 -0.584724 0.604740 3.778258

1 0.034613 -0.268642 3.925012

6 2.221536 -3.674288 -0.385182

1 1.517201 -3.272565 -1.097217

6 1.642606 3.069073 -0.334006

6 -2.841636 4.223299 3.157030

1 -3.390740 4.524098 4.054321

1 -3.558462 4.123759 2.338076

1 -2.157948 5.042434 2.905626

6 -0.953679 -2.715979 3.201103

1 -0.798839 -2.153509 4.122073

1 -0.478220 -3.694141 3.316900

1 -2.026135 -2.875594 3.095315

6 3.090052 -4.756299 1.462373

1 3.167810 -5.332504 2.373768

6 4.134058 0.347540 -1.317679

6 4.668794 1.237833 -0.346615

1 4.028442 1.628383 0.431186

6 -5.414442 -2.124438 -0.172463

1 -6.330091 -2.476134 -0.639306

6 -4.680769 -4.525795 0.048458

1 -5.741816 -4.784509 0.081348

1 -4.155855 -5.120806 0.800532

1 -4.301188 -4.823188 -0.936281

6 2.344802 -0.961586 -2.348458

1 1.316646 -1.295056 -2.362411

6 4.531557 -0.986118 -3.362430

1 5.217982 -1.319735 -4.135324

6 1.618758 4.561699 1.630225

1 1.583220 5.570359 2.032388

6 -1.472533 -3.954592 -2.262469

1 -0.575001 -4.055201 -2.878399

1 -2.344474 -4.299141 -2.817283

1 -1.328424 -4.577009 -1.373916

6 1.466882 5.341861 -2.013836

1 1.404697 6.204156 -2.670052

6 1.513580 5.509399 -0.649341

1 1.486810 6.504160 -0.213630

6 1.682149 3.475896 2.469773

1 1.694830 3.608525 3.546181

6 4.151310 -4.047986 0.824986

1 5.172618 -3.989539 1.174626

6 1.506594 4.038448 -2.562529

1 1.472024 3.907514 -3.639888

6 1.594777 2.932609 -1.746161

1 1.599019 1.949268 -2.196024

6 3.617750 -3.377171 -0.313665

1 4.161541 -2.725744 -0.980868

6 -0.753565 1.171871 -4.981788

1 -0.507982 2.237503 -4.922163

1 -1.566711 1.034865 -5.694150

1 0.142815 0.641369 -5.308843

6 5.017333 -0.112134 -2.355006

6 6.854357 1.165881 -1.399418

1 7.890962 1.485978 -1.417087

6 3.220897 -1.398869 -3.364132

1 2.852568 -2.064713 -4.137878

6 3.290305 -0.855034 1.943122

1 4.163765 -0.364140 1.544186

6 1.970926 -0.801833 1.368071

6 2.775152 -0.120730 -1.334958

6 -1.265219 2.789673 4.513870

1 -1.208717 3.598685 5.238283

6 -5.214655 -0.745417 -0.017176

6 1.726377 2.170231 1.934365

1 1.770968 1.329877 2.613904

6 0.351803 1.477303 5.951281

1 0.748939 2.440653 6.282674

1 1.194753 0.806936 5.760193

1 -0.219815 1.056652 6.786780

6 1.897664 -4.526922 0.711169

1 0.913302 -4.902602 0.956826

6 -2.133285 2.606051 -0.752023

6 -2.129725 4.108978 -0.659617

1 -1.728119 4.412666 0.309572

1 -3.130804 4.511950 -0.810050

1 -1.449582 4.500836 -1.422060

6 -6.286735 0.245676 -0.388605

1 -5.867076 1.238543 -0.565088

1 -7.019184 0.326565 0.423568

1 -6.824641 -0.071499 -1.285782

6 1.598696 4.390056 0.220794

6 5.987745 1.633243 -0.385819

1 6.362555 2.318647 0.367896

6 6.372382 0.313422 -2.363693

1 7.021718 -0.049356 -3.155204

1 -2.515897 -3.326220 1.094316

----------------------------------------------------------------------------------------------------------------

**B**

----------------------------------------------------------------------------------------------------------------

Number of imaginary frequencies = 0

Electronic energy: HF = -3001.0228474

Zero-point correction = 0.822847 (Hartree/Particle)

Thermal correction to Energy = 0.875667

Thermal correction to Enthalpy = 0.876612

Thermal correction to Gibbs Free Energy = 0.732685

Sum of electronic and zero-point Energies = -3000.200000

Sum of electronic and thermal Energies = -3000.147180

Sum of electronic and thermal Enthalpies = -3000.146236

Sum of electronic and thermal Free Energies = -3000.290163

......................................................................................................................................................

Cartesian Coordinates

......................................................................................................................................................

45 -0.539207 0.241985 -1.532020

26 2.568644 -0.353404 2.736933

15 1.386524 -0.623678 -0.666134

15 -1.541588 0.322512 0.473027

8 -0.409008 2.434627 -1.996437

8 -2.217197 1.267713 -2.441835

6 -0.264482 -2.712538 -1.084715

6 -1.063183 -1.688053 -1.676046

6 -1.593925 2.391158 -2.451064

6 -5.374370 -2.112666 -0.055155

1 -6.261330 -2.713550 -0.240614

6 0.969884 -2.381525 -0.457420

6 -1.900602 -4.388025 -1.797769

1 -2.232732 -5.421364 -1.835801

6 -3.102961 -0.587659 0.399810

6 3.805900 -2.019328 2.722910

1 4.257688 -2.449700 1.840636

6 -2.283868 3.632738 -2.931269

1 -2.700577 4.147457 -2.057661

1 -3.097397 3.387238 -3.614859

1 -1.567339 4.303546 -3.408286

6 -1.856338 2.041178 0.952984

6 -0.692756 -4.076219 -1.118416

6 -3.085834 2.437654 1.503649

1 -3.898714 1.726676 1.594195

6 -2.225107 -2.036094 -2.337636

1 -2.855958 -1.264818 -2.768119

6 0.115734 -5.049779 -0.474840

1 -0.205630 -6.087470 -0.487123

6 -2.196505 4.649213 1.835225

6 -0.961319 4.272274 1.300704

6 -0.800107 2.954878 0.860229

1 0.146467 2.651426 0.432931

6 1.296914 -4.699840 0.147828

1 1.904982 -5.460252 0.627048

6 1.279263 1.263265 2.862596

6 -2.632482 -3.392121 -2.408552

1 -3.550186 -3.639571 -2.932994

6 0.791338 0.306166 1.925858

6 -5.324571 -0.805591 -0.555210

6 1.789624 0.159243 0.895657

6 -4.312911 -2.676896 0.661101

6 -3.266699 3.749571 1.947498

6 -0.544702 -0.375308 1.901230

1 -0.397715 -1.431678 1.656360

6 -1.314787 -0.241260 3.220312

1 -1.522966 0.806110 3.449521

1 -0.707821 -0.657866 4.028631

1 -2.264677 -0.775925 3.188305

6 1.739567 -3.356624 0.146632

1 2.686816 -3.099658 0.600622

6 3.472919 -0.681875 4.571193

1 3.605453 0.084276 5.322113

6 2.890715 1.018334 1.223730

1 3.800278 1.119100 0.651731

6 2.333232 -1.527542 4.428785

1 1.456809 -1.520069 5.061553

6 4.383718 -0.988989 3.518220

1 5.328480 -0.498327 3.331144

6 -3.176170 -1.898259 0.888968

1 -2.338267 -2.344043 1.413047

6 -4.362170 -4.110393 1.124292

1 -3.820451 -4.247432 2.064434

1 -3.894942 -4.763163 0.377702

1 -5.390297 -4.451087 1.268942

6 -4.171470 -0.048863 -0.330873

1 -4.088287 0.941472 -0.762625

6 -6.488834 -0.222912 -1.316045

1 -7.005562 -0.988980 -1.900467

1 -6.161827 0.566537 -1.997851

1 -7.224103 0.214822 -0.630610

6 2.533797 -2.352829 3.284159

1 1.836676 -3.082528 2.898892

6 2.567226 1.697172 2.430387

1 3.215482 2.377851 2.964025

6 -4.581974 4.194331 2.537601

1 -4.448005 4.584214 3.552029

1 -5.030204 4.996047 1.940914

1 -5.298020 3.370357 2.584876

1 -2.331768 5.672155 2.178558

6 0.177088 5.252550 1.169618

1 -0.002502 6.158261 1.753556

1 1.119064 4.807836 1.505957

1 0.313947 5.549315 0.123302

6 4.359920 3.260407 -3.096876

6 4.980163 2.088016 -3.461317

6 4.475473 0.832211 -3.032503

6 3.309875 0.790364 -2.196362

6 2.691197 2.019635 -1.849255

6 3.200040 3.220832 -2.290032

1 5.975584 -0.329379 -4.065656

1 4.751852 4.214450 -3.433901

1 5.865477 2.103036 -4.090001

6 5.097274 -0.380105 -3.428783

6 2.832315 -0.495031 -1.763667

1 1.788935 2.022594 -1.254139

1 2.697174 4.143656 -2.019891

6 3.459487 -1.653723 -2.195110

6 4.596701 -1.596670 -3.029038

1 3.081723 -2.621576 -1.890278

1 5.070287 -2.519559 -3.346449

1 0.781842 1.570682 3.770378

----------------------------------------------------------------------------------------------------------------

**C**

----------------------------------------------------------------------------------------------------------------

Number of imaginary frequencies = 0

Electronic energy: HF = -3256.6663518

Zero-point correction = 0.912247 (Hartree/Particle)

Thermal correction to Energy = 0.970435

Thermal correction to Enthalpy = 0.971379

Thermal correction to Gibbs Free Energy = 0.818699

Sum of electronic and zero-point Energies = -3255.754105

Sum of electronic and thermal Energies = -3255.695917

Sum of electronic and thermal Enthalpies = -3255.694972

Sum of electronic and thermal Free Energies = -3255.847653 ......................................................................................................................................................

Cartesian Coordinates

......................................................................................................................................................

45 0.869452 -0.506456 -0.863920

26 -2.824075 2.336504 1.659026

15 -1.361941 0.055789 -0.705987

15 1.389385 0.406460 1.135181

6 -0.190900 1.913559 -2.258755

6 1.003513 1.234588 -1.865420

6 5.676138 2.016332 0.893233

1 6.693537 2.383702 0.784644

6 -1.474162 1.447640 -1.858492

6 1.174744 3.542485 -3.493520

1 1.242624 4.423909 -4.123722

6 3.080818 1.059556 1.136132

6 -4.064100 3.453011 0.423069

1 -4.635376 3.061330 -0.404874

6 1.294020 -1.029315 2.251941

6 -0.104680 3.077176 -3.092667

6 0.627041 -0.989572 3.482401

1 0.186841 -0.071901 3.843387

6 2.225295 1.700750 -2.295439

1 3.136306 1.165292 -2.077194

6 -1.309325 3.704333 -3.504845

1 -1.245569 4.579743 -4.144670

6 1.046629 -3.341562 3.782570

6 1.711086 -3.411462 2.552715

6 1.836273 -2.244783 1.792392

1 2.361227 -2.279030 0.843615

6 -2.540605 3.217715 -3.117658

1 -3.449945 3.709483 -3.446893

6 -1.862844 1.295976 3.142653

6 2.305440 2.863215 -3.106461

1 3.284429 3.197325 -3.435983

6 -1.102853 1.264016 1.932208

6 5.467784 0.762850 1.481776

6 -1.911947 0.612385 0.931191

6 4.617286 2.808796 0.434350

6 0.501447 -2.144516 4.261768

6 0.293118 1.785562 1.730218

1 0.285987 2.458260 0.864390

6 0.856935 2.548094 2.936755

1 0.986762 1.905842 3.810203

1 0.168772 3.353630 3.205726

1 1.826442 2.987396 2.701486

6 -2.625519 2.087848 -2.275151

1 -3.595483 1.743428 -1.938468

6 -3.455803 4.091302 2.554278

1 -3.471792 4.246470 3.624018

6 -3.172168 0.289072 1.537319

1 -3.998854 -0.191388 1.036442

6 -2.356769 4.356008 1.682965

1 -1.397969 4.761510 1.974660

6 -4.511591 3.536887 1.773331

1 -5.467558 3.198971 2.148100

6 3.315525 2.316534 0.560072

1 2.491762 2.908445 0.177314

6 4.862387 4.161520 -0.185374

1 4.804079 4.955109 0.568777

1 4.116813 4.382752 -0.954710

1 5.853933 4.216227 -0.641656

6 4.156195 0.287800 1.597121

1 3.977778 -0.686225 2.038562

6 6.628860 -0.052633 1.992327

1 6.931609 0.284529 2.990506

1 7.499397 0.043785 1.337825

1 6.371375 -1.112295 2.064487

6 -2.729326 3.960048 0.367117

1 -2.105684 4.012954 -0.511786

6 -3.132800 0.698692 2.894934

1 -3.946148 0.624171 3.602723

6 -0.193283 -2.090381 5.598960

1 0.526526 -1.911210 6.406150

1 -0.932189 -1.285079 5.630129

1 -0.703680 -3.031367 5.820746

1 0.945097 -4.243635 4.381567

6 2.237244 -4.722281 2.025042

1 3.023419 -4.565335 1.282018

1 2.640230 -5.346631 2.827082

1 1.432671 -5.290326 1.541767

6 -2.775688 -4.841236 1.145679

6 -3.657095 -4.620775 0.112928

6 -3.613097 -3.416564 -0.639038

6 -2.638233 -2.418158 -0.312119

6 -1.752582 -2.676194 0.767269

6 -1.815739 -3.856112 1.474377

1 -5.248031 -3.956672 -1.946746

1 -2.816064 -5.766505 1.711237

1 -4.400758 -5.368010 -0.147976

6 -4.505934 -3.196478 -1.720861

6 -2.588671 -1.226545 -1.110836

1 -1.003302 -1.945006 1.043039

1 -1.121970 -4.022807 2.290456

6 -3.446546 -1.076669 -2.184170

6 -4.422738 -2.054654 -2.480491

1 -3.368225 -0.209287 -2.825300

1 -5.093905 -1.899258 -3.318674

1 -1.551378 1.750030 4.072127

6 1.262561 -2.144070 -2.640410

6 0.599222 -3.235431 -2.017445

6 0.544875 -1.453258 -3.644993

6 -0.646490 -3.679499 -2.448900

1 1.101551 -3.775489 -1.215840

6 -0.711894 -1.889445 -4.076322

1 1.033003 -0.613159 -4.128073

6 -1.290805 -3.018957 -3.501018

1 -1.118021 -4.534147 -1.974708

1 -1.225427 -1.361626 -4.874542

1 -2.255071 -3.373028 -3.847432

5 2.876348 -1.866413 -2.406836

8 3.434116 -0.863782 -3.268415

1 4.085923 -1.293666 -3.832634

8 3.675469 -3.047634 -2.380913

1 3.160684 -3.843906 -2.224973

8 2.839031 -1.203976 -0.967142

1 3.580425 -0.593617 -0.848860

----------------------------------------------------------------------------------------------------------------

**C1**

----------------------------------------------------------------------------------------------------------------

Number of imaginary frequencies = 0

Electronic energy: HF = -3409.3777479

Zero-point correction = 0.951864 (Hartree/Particle)

Thermal correction to Energy = 1.012578

Thermal correction to Enthalpy = 1.013522

Thermal correction to Gibbs Free Energy = 0.856390

Sum of electronic and zero-point Energies = -3408.425884

Sum of electronic and thermal Energies = -3408.365170

Sum of electronic and thermal Enthalpies = -3408.364226

Sum of electronic and thermal Free Energies = -3408.521358

......................................................................................................................................................

Cartesian Coordinates

......................................................................................................................................................

45 0.730120 -0.070267 0.928924

26 -3.446988 -0.805488 -2.181461

15 -1.526112 0.242636 0.638041

15 1.112598 -0.342576 -1.296521

6 -1.200430 -2.260996 1.581004

6 0.175893 -1.979360 1.303778

6 4.519507 -3.348924 -2.013199

1 5.324312 -4.066802 -2.152285

6 -2.199395 -1.265482 1.385440

6 -0.595657 -4.522628 2.318419

1 -0.887578 -5.493221 2.708085

6 2.475048 -1.506200 -1.621114

6 -4.985709 -1.861030 -1.271558

1 -5.497014 -1.561976 -0.369370

6 1.584004 1.269032 -1.999106

6 -1.593184 -3.536501 2.101531

6 0.870707 1.876237 -3.043017

1 0.020190 1.383955 -3.490670

6 1.111696 -2.962664 1.558769

1 2.161501 -2.761513 1.384315

6 -2.962570 -3.751792 2.410165

1 -3.259749 -4.716016 2.812702

6 2.314935 3.798211 -2.909339

6 3.039921 3.218060 -1.862945

6 2.661372 1.950020 -1.415032

1 3.191422 1.514185 -0.581324

6 -3.905121 -2.763196 2.217302

1 -4.946236 -2.947140 2.461403

6 -2.230258 0.342953 -3.366784

6 0.723743 -4.233565 2.056695

1 1.490024 -4.980712 2.243094

6 -1.507677 -0.161900 -2.239749

6 4.757456 -1.998195 -2.290879

6 -2.143865 0.356777 -1.056590

6 3.272222 -3.803193 -1.568226

6 1.227971 3.146621 -3.505440

6 -0.306845 -1.065727 -2.265759

1 -0.538863 -1.960018 -1.676402

6 0.092647 -1.505772 -3.681279

1 0.438472 -0.667818 -4.290114

1 -0.774614 -1.953187 -4.174339

1 0.889020 -2.248672 -3.647918

6 -3.524644 -1.509541 1.688014

1 -4.280298 -0.755256 1.501927

6 -4.411889 -2.077444 -3.495313

1 -4.396963 -1.953372 -4.569129

6 -3.269896 1.143626 -1.472844

1 -3.953524 1.652765 -0.809921

6 -3.459618 -2.805517 -2.719845

1 -2.602034 -3.339890 -3.104964

6 -5.356276 -1.497033 -2.599001

1 -6.182675 -0.857499 -2.875793

6 2.253075 -2.867701 -1.377421

1 1.292751 -3.208437 -1.009627

6 3.021884 -5.267118 -1.304407

1 3.926652 -5.768016 -0.949605

1 2.701841 -5.781905 -2.218016

1 2.236089 -5.404765 -0.556176

6 3.721806 -1.078468 -2.089262

1 3.897497 -0.030413 -2.299296

6 6.096068 -1.542253 -2.817351

1 6.265927 -0.481543 -2.613994

1 6.157280 -1.682579 -3.902827

1 6.915334 -2.112293 -2.370260

6 -3.812118 -2.671846 -1.346779

1 -3.272990 -3.088908 -0.510289

6 -3.311741 1.140853 -2.890955

1 -4.065143 1.615352 -3.503514

6 0.424259 3.817397 -4.591848

1 1.055709 4.442111 -5.229213

1 -0.081529 3.084098 -5.225555

1 -0.348302 4.464933 -4.159737

1 2.596498 4.787473 -3.262139

6 4.196889 3.930071 -1.208785

1 5.154351 3.505522 -1.532584

1 4.205861 4.993254 -1.460264

1 4.145494 3.833022 -0.119913

6 -0.967825 5.628261 0.198934

6 -1.836573 5.476925 1.254287

6 -2.270516 4.188965 1.666331

6 -1.800146 3.029188 0.965615

6 -0.918351 3.226186 -0.132516

6 -0.507040 4.489529 -0.500457

1 -3.499337 4.921304 3.286776

1 -0.636243 6.617134 -0.099876

1 -2.200632 6.343499 1.798058

6 -3.151856 4.032886 2.767944

6 -2.226280 1.734998 1.422943

1 -0.555903 2.380343 -0.700006

1 0.179111 4.599955 -1.332608

6 -3.077452 1.633836 2.509263

6 -3.551162 2.783853 3.178560

1 -3.373158 0.660448 2.876560

1 -4.220588 2.668961 4.024429

1 -2.025367 0.114094 -4.402290

6 1.454388 0.610517 3.403899

6 0.047437 0.657808 3.530065

6 2.110201 -0.458915 4.055802

6 -0.669532 -0.322287 4.238016

1 -0.479446 1.523148 3.148732

6 1.406828 -1.436424 4.745288

1 3.193483 -0.521947 4.015566

6 0.006479 -1.379704 4.826434

1 -1.748740 -0.250917 4.318330

1 1.939868 -2.250815 5.226731

1 -0.539353 -2.152503 5.358018

5 2.201075 1.786894 2.549228

8 2.313567 3.061364 3.139042

1 2.473826 3.013353 4.086264

8 1.528228 1.942500 1.220840

1 0.964088 2.726136 1.187790

6 3.769625 0.136395 1.542638

8 2.834763 -0.567883 1.079637

8 3.621559 1.242283 2.177006

6 5.179120 -0.361927 1.370233

1 5.888685 0.464138 1.424102

1 5.402572 -1.062027 2.182856

1 5.267781 -0.901213 0.426132

----------------------------------------------------------------------------------------------------------------

**C2**

----------------------------------------------------------------------------------------------------------------

Number of imaginary frequencies = 0

Electronic energy: HF = -3409.3518773

Zero-point correction = 0.951624 (Hartree/Particle)

Thermal correction to Energy = 1.012336

Thermal correction to Enthalpy = 1.013280

Thermal correction to Gibbs Free Energy = 0.857018

Sum of electronic and zero-point Energies = -3408.400253

Sum of electronic and thermal Energies = -3408.339541

Sum of electronic and thermal Enthalpies = -3408.338597

Sum of electronic and thermal Free Energies = -3408.494859

......................................................................................................................................................

Cartesian Coordinates

......................................................................................................................................................

45 0.706902 -0.413698 0.646978

26 -3.966158 0.182386 -1.467570

15 -1.346457 0.432633 0.912972

15 0.611713 -0.476132 -1.605187

6 -1.561617 -2.177619 1.507118

6 -0.262963 -2.186459 0.910125

6 3.241937 -4.227503 -1.765357

1 3.855409 -5.124752 -1.737238

6 -2.235586 -0.943050 1.696027

6 -1.511104 -4.614979 1.729742

1 -1.977097 -5.541746 2.050676

6 1.664360 -1.935483 -1.849455

6 -5.493353 -0.596731 -0.298480

1 -5.711878 -0.299121 0.715530

6 1.365222 0.955012 -2.443783

6 -2.189444 -3.385740 1.944489

6 2.743882 0.992526 -2.679988

1 3.371278 0.144873 -2.446561

6 0.353708 -3.407789 0.723903

1 1.345730 -3.465244 0.295598

6 -3.452933 -3.293539 2.586149

1 -3.930480 -4.205582 2.932807

6 2.547284 3.234656 -3.527269

6 1.158359 3.208995 -3.341583

6 0.578777 2.073099 -2.774545

1 -0.487044 2.071074 -2.598722

6 -4.072829 -2.074443 2.776319

1 -5.036758 -2.026406 3.272211

6 -2.784906 1.163097 -2.824926

6 -0.274690 -4.616670 1.127096

1 0.247997 -5.555235 0.965910

6 -1.991077 0.366567 -1.937992

6 3.721600 -3.054798 -1.170280

6 -2.212964 0.878536 -0.602572

6 1.989767 -4.282081 -2.389839

6 3.351740 2.141127 -3.200670

6 -1.059100 -0.750720 -2.355132

1 -1.386385 -1.686622 -1.888648

6 -0.999259 -0.909094 -3.881816

1 -0.675649 0.019349 -4.356241

1 -1.991903 -1.166488 -4.261885

1 -0.306331 -1.693857 -4.184745

6 -3.470126 -0.882527 2.313529

1 -3.985398 0.063837 2.432975

6 -5.467463 -0.670174 -2.604054

1 -5.646378 -0.424958 -3.641599

6 -3.167274 1.946135 -0.693399

1 -3.543281 2.515863 0.143314

6 -4.583771 -1.681238 -2.119148

1 -3.981811 -2.342834 -2.727067

6 -6.031261 -0.003016 -1.477309

1 -6.712749 0.835350 -1.513229

6 1.199094 -3.127193 -2.415194

1 0.211041 -3.186784 -2.854920

6 1.500422 -5.555783 -3.031206

1 1.774075 -5.588157 -4.092293

1 0.411730 -5.639791 -2.970165

1 1.939024 -6.435832 -2.554063

6 2.921383 -1.909909 -1.214363

1 3.294607 -1.006648 -0.743595

6 5.054315 -3.016605 -0.465231

1 5.814440 -3.575953 -1.017816

1 4.980097 -3.468927 0.531132

1 5.400619 -1.987472 -0.342478

6 -4.598404 -1.636625 -0.695833

1 -4.015476 -2.260811 -0.036659

6 -3.506692 2.122904 -2.058372

1 -4.228515 2.827878 -2.445498

6 4.848342 2.171123 -3.376253

1 5.202368 3.174732 -3.623025

1 5.338563 1.841670 -2.454927

1 5.165381 1.496292 -4.179403

1 3.010359 4.129321 -3.935877

6 0.297300 4.375664 -3.759814

1 -0.638958 4.402426 -3.195906

1 0.814193 5.328034 -3.611128

1 0.043230 4.309125 -4.824219

6 0.177212 5.679423 0.822829

6 -0.388533 5.513926 2.064800

6 -0.897634 4.251998 2.467988

6 -0.849186 3.147545 1.555325

6 -0.249055 3.353106 0.291123

6 0.256994 4.582270 -0.063901

1 -1.444146 4.908844 4.450308

1 0.576911 6.643989 0.527155

1 -0.440251 6.342129 2.765238

6 -1.419366 4.061460 3.771159

6 -1.370606 1.884160 1.993426

1 -0.133780 2.524400 -0.389676

1 0.744050 4.698068 -1.025123

6 -1.830551 1.734055 3.296012

6 -1.863194 2.825822 4.184938

1 -2.170004 0.767746 3.645197

1 -2.242613 2.682944 5.191180

1 -2.860196 1.030477 -3.893366

6 2.144455 -0.270794 2.607800

6 2.938002 -1.421123 2.354511

6 0.987885 -0.462468 3.401698

6 2.623307 -2.658609 2.904818

1 3.833811 -1.323546 1.749621

6 0.665662 -1.713513 3.953768

1 0.389161 0.408566 3.643231

6 1.483954 -2.807857 3.709737

1 3.262557 -3.516027 2.714448

1 -0.222678 -1.821499 4.568474

1 1.240323 -3.777798 4.130429

5 2.515648 1.238083 2.049132

8 1.986826 1.323445 0.644603

1 2.751905 1.198708 0.041625

6 4.840178 1.116657 1.048295

8 4.465752 0.736220 -0.075969

8 4.039692 1.383567 2.042500

6 6.300555 1.308298 1.371599

1 6.471675 2.340140 1.691088

1 6.578972 0.662860 2.209928

1 6.915666 1.079463 0.501987

8 1.925062 2.287880 2.797329

1 2.233833 2.277304 3.709340

----------------------------------------------------------------------------------------------------------------

D

----------------------------------------------------------------------------------------------------------------

Number of imaginary frequencies = 0

Electronic energy = HF=-3256.7039866

Zero-point correction = 0.912667 (Hartree/Particle)

Thermal correction to Energy = 0.970854

Thermal correction to Enthalpy = 0.971798

Thermal correction to Gibbs Free Energy = 0.818503

Sum of electronic and zero-point Energies = -3255.791319

Sum of electronic and thermal Energies = -3255.733133

Sum of electronic and thermal Enthalpies = -3255.732189

Sum of electronic and thermal Free Energies = -3255.885484

......................................................................................................................................................

Cartesian Coordinates

......................................................................................................................................................

45 0.798500 -0.503859 -0.801951

26 -2.967530 2.322760 1.495597

15 -1.404242 -0.059070 -0.671818

15 1.310322 0.518610 1.288230

6 -0.352961 1.747443 -2.353228

6 0.869002 1.166202 -1.888843

6 5.603628 1.966444 0.618521

1 6.614953 2.267384 0.358351

6 -1.604990 1.206201 -1.952472

6 0.928303 3.413141 -3.618759

1 0.956726 4.262594 -4.294053

6 3.005492 1.180456 1.249401

6 -4.228473 3.282848 0.159616

1 -4.783652 2.794796 -0.627228

6 1.245959 -0.793586 2.552843

6 -0.327797 2.865138 -3.245916

6 0.789061 -0.617197 3.863332

1 0.478317 0.359258 4.209781

6 2.069003 1.726583 -2.276057

1 3.011473 1.317154 -1.937156

6 -1.566185 3.357622 -3.737810

1 -1.555606 4.198012 -4.425855

6 1.101894 -2.966848 4.291314

6 1.553582 -3.177784 2.983931

6 1.618821 -2.078535 2.122525

1 1.958153 -2.234887 1.100795

6 -2.764810 2.781878 -3.368156

1 -3.697933 3.167612 -3.765335

6 -2.021007 1.406692 3.082271

6 2.090763 2.857231 -3.136470

1 3.052263 3.269471 -3.427950

6 -1.220990 1.333849 1.901769

6 5.401256 0.722527 1.228121

6 -1.984190 0.597964 0.913621

6 4.541323 2.828595 0.326950

6 0.712040 -1.700781 4.745564

6 0.159862 1.912460 1.725100

1 0.160519 2.496526 0.796668

6 0.611905 2.828736 2.867386

1 0.682017 2.305723 3.822323

1 -0.103059 3.647306 2.985553

1 1.593269 3.255753 2.655945

6 -2.790664 1.704551 -2.453213

1 -3.740137 1.288960 -2.135220

6 -3.642582 4.140380 2.219753

1 -3.665612 4.398634 3.269226

6 -3.252679 0.270495 1.502948

1 -4.046295 -0.269639 1.008604

6 -2.548475 4.347693 1.326757

1 -1.601009 4.803819 1.577365

6 -4.682024 3.486300 1.495725

1 -5.630024 3.161853 1.901398

6 3.239344 2.416590 0.633208

1 2.409116 3.056875 0.354659

6 4.778544 4.171140 -0.316671

1 4.799486 4.967306 0.436633

1 3.981601 4.413535 -1.026315

1 5.733158 4.196483 -0.847810

6 4.092584 0.342574 1.556071

1 3.921547 -0.605697 2.058015

6 6.554160 -0.217286 1.468119

1 7.480045 0.326869 1.670899

1 6.718430 -0.834963 0.577296

1 6.357668 -0.888474 2.308415

6 -2.907324 3.817014 0.055457

1 -2.282623 3.800134 -0.824247

6 -3.266605 0.761034 2.833418

1 -4.098166 0.702930 3.521269

6 0.242850 -1.502584 6.164906

1 1.094112 -1.354582 6.839660

1 -0.403267 -0.625040 6.252487

1 -0.311540 -2.372717 6.526752

1 1.041566 -3.812783 4.971886

6 1.891525 -4.560338 2.488049

1 2.660235 -4.531097 1.710714

1 2.246620 -5.202480 3.298010

1 1.002914 -5.034483 2.053488

6 -2.495510 -4.880783 1.599161

6 -3.180906 -4.912313 0.406545

6 -3.172765 -3.796392 -0.470795

6 -2.450696 -2.614261 -0.100379

6 -1.744527 -2.622502 1.132167

6 -1.767059 -3.724675 1.959500

1 -4.384331 -4.749027 -1.985808

1 -2.511024 -5.739446 2.262649

1 -3.737907 -5.797307 0.113027

6 -3.846916 -3.843681 -1.719132

6 -2.451507 -1.505533 -1.013417

1 -1.178064 -1.754601 1.442572

1 -1.221542 -3.694811 2.895959

6 -3.096859 -1.607853 -2.231960

6 -3.804802 -2.777612 -2.584089

1 -3.037635 -0.798132 -2.947386

1 -4.302829 -2.827529 -3.546399

1 -1.753866 1.926376 3.990677

6 0.319454 -1.657085 -2.438402

6 0.217010 -3.019331 -2.101034

6 0.037209 -1.279582 -3.758665

6 -0.179176 -3.970635 -3.041689

1 0.419788 -3.347822 -1.081210

6 -0.349543 -2.233567 -4.708246

1 0.110457 -0.238275 -4.054605

6 -0.468114 -3.575885 -4.350614

1 -0.265268 -5.014143 -2.753346

1 -0.560230 -1.921842 -5.727406

1 -0.776316 -4.312311 -5.086044

5 3.768361 -1.305121 -2.105912

8 5.102419 -1.094548 -1.909398

1 5.617259 -1.288723 -2.701939

8 3.254156 -1.715925 -3.278170

1 2.282475 -1.768179 -3.292456

8 2.960154 -1.044051 -0.983735

1 3.493630 -0.634654 -0.275382

......................................................................................................................................................

Cartesian Coordinates

......................................................................................................................................................

45 0.841342 0.317346 0.648551

26 -3.907706 -1.360781 -0.625338

15 -1.343712 0.765621 0.682621

15 0.717558 -1.443492 -0.975717

6 -0.903914 -0.775564 2.824480

6 0.363554 -0.901624 2.181173

6 3.976277 -3.942000 1.072132

1 4.745224 -4.472888 1.627859

6 -1.875305 0.108161 2.288251

6 -0.232278 -2.417946 4.512685

1 -0.450942 -2.991813 5.407991

6 1.992946 -2.572534 -0.329951

6 -5.256506 -1.328986 0.949509

1 -5.487854 -0.462940 1.550610

6 1.100502 -1.183607 -2.745532

6 -1.210081 -1.521934 4.005413

6 2.196913 -1.792420 -3.364633

1 2.853518 -2.440979 -2.795991

6 1.286110 -1.778418 2.714123

1 2.266071 -1.897906 2.267689

6 -2.471500 -1.310996 4.621470

1 -2.708901 -1.861847 5.527098

6 1.593282 -0.766891 -5.456875

6 0.477399 -0.158636 -4.865932

6 0.248530 -0.362982 -3.504521

1 -0.614519 0.101007 -3.045575

6 -3.386137 -0.420541 4.094925

1 -4.343061 -0.271916 4.584415

6 -2.888880 -1.411225 -2.413317

6 0.981433 -2.537783 3.875479

1 1.735933 -3.214723 4.265540

6 -1.984498 -1.317370 -1.310410

6 4.306112 -2.737592 0.430826

6 -2.281880 -0.072823 -0.625011

6 2.684762 -4.470204 1.026209

6 2.458232 -1.584061 -4.725947

6 -0.915830 -2.330315 -0.971713

1 -1.038968 -2.633064 0.074555

6 -0.954565 -3.555810 -1.890105

1 -0.794456 -3.263950 -2.930609

1 -1.924907 -4.055131 -1.815835

1 -0.178468 -4.276002 -1.628455

6 -3.098066 0.287754 2.906382

1 -3.845501 0.945741 2.479090

6 -5.293912 -2.891760 -0.746755

1 -5.541572 -3.405126 -1.665321

6 -3.399255 0.533988 -1.296973

1 -3.868569 1.462141 -1.008882

6 -4.249668 -3.247312 0.159415

1 -3.572475 -4.083149 0.051408

6 -5.918288 -1.708417 -0.254310

1 -6.722772 -1.169340 -0.734748

6 1.694969 -3.771338 0.318796

1 0.683506 -4.160679 0.325470

6 2.328579 -5.737678 1.760920

1 1.863640 -6.468823 1.091526

1 1.610463 -5.528655 2.562332

1 3.209328 -6.202414 2.209756

6 3.302943 -2.058909 -0.262417

1 3.549481 -1.117839 -0.743326

6 5.708865 -2.185655 0.485333

1 6.379352 -2.757243 -0.166729

1 6.118660 -2.244755 1.498533

1 5.732113 -1.142966 0.159020

6 -4.223419 -2.282795 1.205901

1 -3.529111 -2.261165 2.031681

6 -3.758311 -0.283996 -2.397243

1 -4.583977 -0.110586 -3.072676

6 3.629207 -2.265778 -5.389628

1 3.973409 -1.706765 -6.263615

1 4.470743 -2.375022 -4.699752

1 3.354018 -3.270888 -5.730645

1 1.786558 -0.604149 -6.514660

6 -0.456493 0.695059 -5.688578

1 -1.306433 1.041745 -5.095547

1 0.058966 1.574753 -6.090633

1 -0.848103 0.136663 -6.545261

6 -1.261492 4.720326 -3.073631

6 -1.846179 5.315621 -1.980695

6 -2.029643 4.595907 -0.770148

6 -1.618315 3.225193 -0.698188

6 -1.006528 2.651501 -1.839748

6 -0.827294 3.377121 -2.994139

1 -2.896580 6.258597 0.304079

1 -1.121324 5.280518 -3.992453

1 -2.171260 6.351061 -2.022649

6 -2.589059 5.219176 0.374738

6 -1.817476 2.515469 0.533413

1 -0.626157 1.642717 -1.787667

1 -0.335098 2.916811 -3.843797

6 -2.331310 3.178502 1.638151

6 -2.724651 4.531623 1.558148

1 -2.430120 2.662352 2.583988

1 -3.135959 5.018472 2.436082

1 -2.943466 -2.233803 -3.109811

6 1.492927 1.616042 2.090951

6 2.767004 1.195102 2.516920

6 1.020490 2.847394 2.554619

6 3.553355 1.991467 3.355322

1 3.163544 0.229663 2.204467

6 1.801869 3.645579 3.397735

1 0.049281 3.211366 2.243644

6 3.069997 3.223826 3.798638

1 4.527875 1.635747 3.679768

1 1.412729 4.599113 3.745154

1 3.669498 3.841028 4.460589

5 2.249237 2.956706 -0.445199

8 1.845091 1.735684 -0.946326

1 2.661805 1.217844 -1.131633

6 4.543642 2.216797 -0.115617

8 4.364652 1.129247 -0.648004

8 3.593554 3.176620 -0.080920

6 5.810990 2.641802 0.553847

1 6.172441 3.571245 0.104855

1 5.593190 2.848531 1.605730

1 6.563608 1.860033 0.466120

8 1.380701 3.977216 -0.339764

1 1.748785 4.728437 0.140449

----------------------------------------------------------------------------------------------------------------

**D1**

----------------------------------------------------------------------------------------------------------------

Number of imaginary frequencies = 0

Electronic energy: HF=-3409.376748

Zero-point correction = 0.951435 (Hartree/Particle)

Thermal correction to Energy = 1.012480

Thermal correction to Enthalpy = 1.013424

Thermal correction to Gibbs Free Energy = 0.853985

Sum of electronic and zero-point Energies = -3408.425313

Sum of electronic and thermal Energies = -3408.364268

Sum of electronic and thermal Enthalpies = -3408.363324

Sum of electronic and thermal Free Energies = -3408.522763

......................................................................................................................................................

Cartesian Coordinates

......................................................................................................................................................

45 0.631035 0.252858 0.972494

26 -3.674296 -0.755376 -1.814203

15 -1.320976 1.044250 0.179287

15 0.784151 -1.548310 -0.645710

6 -1.946137 -0.307038 2.389351

6 -0.586614 -0.728661 2.240436

6 2.385966 -5.530238 1.061224

1 2.753258 -6.459575 1.490400

6 -2.482587 0.681925 1.519078

6 -2.240766 -1.854693 4.266458

1 -2.863684 -2.278357 5.048271

6 1.460890 -3.132163 -0.021555

6 -5.423849 -0.495304 -0.731828

1 -5.738185 0.431186 -0.275879

6 1.840864 -1.059103 -2.057335

6 -2.779046 -0.852935 3.416215

6 1.335539 -0.828605 -3.341231

1 0.294370 -1.018793 -3.563670

6 -0.104659 -1.695963 3.100585

1 0.927868 -2.018101 3.030469

6 -4.099330 -0.345931 3.551086

1 -4.732809 -0.745203 4.338020

6 3.493243 -0.041611 -4.069227

6 4.028028 -0.258099 -2.791255

6 3.189234 -0.761376 -1.796121

1 3.584940 -0.902137 -0.795777

6 -4.579236 0.640153 2.712876

1 -5.588819 1.016959 2.840242

6 -2.223504 -0.967904 -3.254915

6 -0.936004 -2.262956 4.103084

1 -0.519686 -3.019949 4.761714

6 -1.639732 -0.958136 -1.947727

6 3.159013 -4.870464 0.100331

6 -1.967015 0.316867 -1.349285

6 1.146854 -5.029951 1.476162

6 2.155815 -0.322922 -4.360498

6 -0.875005 -2.094378 -1.316465

1 -1.389053 -2.356695 -0.384701

6 -0.813312 -3.347800 -2.197430

1 -0.242120 -3.177380 -3.112790

1 -1.824917 -3.655855 -2.476918

1 -0.343016 -4.170609 -1.658416

6 -3.771726 1.151179 1.670624

1 -4.178291 1.887701 0.985836

6 -5.098572 -2.181493 -2.272859

1 -5.106717 -2.746705 -3.194363

6 -2.773832 1.047404 -2.289515

1 -3.183228 2.033132 -2.123462

6 -4.414489 -2.540939 -1.072334

1 -3.819569 -3.431408 -0.922616

6 -5.724683 -0.918293 -2.059984

1 -6.291422 -0.360455 -2.792274

6 0.695429 -3.827506 0.926387

1 -0.256963 -3.430690 1.256089

6 0.304082 -5.771915 2.483992

1 0.924320 -6.243421 3.251706

1 -0.275171 -6.568195 2.001732

1 -0.404489 -5.101298 2.977949

6 2.684503 -3.668183 -0.437815

1 3.274833 -3.165020 -1.194034

6 4.466636 -5.458832 -0.369966

1 5.085545 -4.710171 -0.871563

1 4.295452 -6.275500 -1.080993

1 5.040250 -5.872683 0.464668

6 -4.614250 -1.500674 -0.120663

1 -4.202421 -1.465118 0.876015

6 -2.919188 0.259282 -3.459965

1 -3.501814 0.519232 -4.332368

6 1.593686 -0.103434 -5.743782

1 2.193194 0.612756 -6.311641

1 1.578045 -1.040443 -6.312411

1 0.565192 0.267817 -5.700508

1 4.134197 0.358903 -4.851001

6 5.477118 0.041052 -2.495594

1 6.114888 -0.812459 -2.753676

1 5.834628 0.898148 -3.072887

1 5.632467 0.256876 -1.434301

6 1.640718 4.310208 -2.947826

6 0.969252 5.171899 -2.108694

6 -0.041780 4.703703 -1.224953

6 -0.362754 3.307080 -1.199596

6 0.301665 2.455658 -2.131664

6 1.284919 2.939469 -2.973066

1 -0.464215 6.650148 -0.379751

1 2.413080 4.681967 -3.613282

1 1.208308 6.231456 -2.104006

6 -0.704488 5.592104 -0.336084

6 -1.266433 2.831002 -0.188219

1 0.032343 1.409106 -2.196707

1 1.781349 2.257520 -3.655188

6 -1.861978 3.729911 0.675590

6 -1.612693 5.117578 0.577989

1 -2.488939 3.368722 1.480912

1 -2.107077 5.795693 1.265148

1 -2.193288 -1.795017 -3.948622

6 0.719229 1.809846 2.374071

6 1.000492 3.129831 1.983746

6 0.723483 1.545075 3.754700

6 1.279352 4.135881 2.914199

1 0.994210 3.407507 0.937537

6 0.997233 2.546366 4.691064

1 0.513271 0.546239 4.117167

6 1.278525 3.848968 4.277039

1 1.493412 5.142211 2.564791

1 0.987857 2.302579 5.750177

1 1.492461 4.625336 5.005038

5 3.240268 2.014384 0.466248

8 3.813525 3.179769 0.105370

1 3.352400 3.657979 -0.595230

8 2.199378 1.406407 -0.187042

1 1.855826 1.857436 -0.980504

6 3.530156 0.202434 2.129369

8 2.494130 -0.429263 1.931640

8 3.871670 1.339099 1.518863

6 4.545311 -0.237858 3.136305

1 5.552768 -0.173104 2.719378

1 4.496811 0.451476 3.986706

1 4.323459 -1.248804 3.474019

----------------------------------------------------------------------------------------------------------------

**D2**

----------------------------------------------------------------------------------------------------------------

Number of imaginary frequencies = 0

Electronic energy: HF = -3409.3682424

Zero-point correction = 0.950432 (Hartree/Particle)

Thermal correction to Energy = 1.012003

Thermal correction to Enthalpy = 1.012947

Thermal correction to Gibbs Free Energy = 0.852351

Sum of electronic and zero-point Energies = -3408.417810

Sum of electronic and thermal Energies = -3408.356239

Sum of electronic and thermal Enthalpies = -3408.355295

Sum of electronic and thermal Free Energies = -3408.515891

......................................................................................................................................................

Cartesian Coordinates

......................................................................................................................................................

45 -0.571686 1.088809 -0.279175

26 2.581907 -3.202843 0.018952

15 1.468606 0.175598 -0.682527

15 -1.527467 -0.978523 0.548342

6 0.027740 -0.142492 -2.944670

6 -0.990341 0.446418 -2.136871

6 -5.689729 -1.214100 -1.386968

1 -6.657935 -1.210388 -1.881710

6 1.337194 -0.319703 -2.424875

6 -1.573226 -0.405059 -4.785939

1 -1.796156 -0.720366 -5.800776

6 -3.202843 -1.210037 -0.126305

6 3.915392 -3.460420 -1.550014

1 4.513818 -2.676098 -1.989822

6 -1.667492 -1.152806 2.366195

6 -0.255938 -0.568427 -4.282492

6 -2.781640 -1.716069 3.007257

1 -3.639642 -2.030992 2.424149

6 -2.258869 0.578807 -2.665310

1 -3.057676 1.001900 -2.069081

6 0.799521 -1.125520 -5.050101

1 0.592948 -1.439729 -6.069314

6 -1.665728 -1.506845 5.132932

6 -0.536101 -0.957367 4.521645

6 -0.551782 -0.783018 3.132710

1 0.331949 -0.392414 2.643562

6 2.069310 -1.262928 -4.527676

1 2.865562 -1.684110 -5.132833

6 1.399164 -3.112772 1.708390

6 -2.544988 0.154891 -3.989131

1 -3.555129 0.277773 -4.368444

6 0.836192 -2.325380 0.659108

6 -5.521665 -0.468279 -0.210447

6 1.799861 -1.297839 0.325482

6 -4.644865 -1.952252 -1.943998

6 -2.793646 -1.892103 4.393975

6 -0.535914 -2.492282 0.065021

1 -0.457114 -2.427424 -1.025983

6 -1.206580 -3.807080 0.471894

1 -1.366774 -3.845460 1.552258

1 -0.573577 -4.652342 0.189521

1 -2.176555 -3.924865 -0.012048

6 2.341445 -0.867517 -3.198840

1 3.335269 -1.001629 -2.790535

6 3.226732 -5.162373 -0.154476

1 3.195559 -5.877203 0.655878

6 2.960350 -1.515947 1.145697

1 3.868491 -0.935860 1.110156

6 2.181542 -4.910391 -1.092469

1 1.224353 -5.411251 -1.125363

6 4.300160 -4.269053 -0.442307

1 5.224715 -4.188193 0.111995

6 -3.399231 -1.938119 -1.302309

1 -2.575360 -2.471454 -1.763720

6 -4.821118 -2.729333 -3.224029

1 -4.718162 -3.806418 -3.051465

1 -4.059553 -2.441815 -3.956645

1 -5.804639 -2.554742 -3.666529

6 -4.271321 -0.470814 0.407418

1 -4.126357 0.118023 1.307300

6 -6.673559 0.312188 0.373459

1 -7.411495 -0.355719 0.832284

1 -7.197568 0.885840 -0.397660

1 -6.334591 1.007902 1.146344

6 2.601998 -3.856882 -1.952444

1 2.020637 -3.417768 -2.748510

6 2.701754 -2.617949 2.002054

1 3.399169 -3.048249 2.706873

6 -3.994022 -2.487101 5.087440

1 -4.504235 -1.736904 5.702193

1 -4.717867 -2.878190 4.368398

1 -3.701363 -3.304213 5.754211

1 -1.667334 -1.650020 6.210970

6 0.672319 -0.543620 5.324240

1 1.588803 -0.643629 4.735756

1 0.593749 0.504443 5.638397

1 0.777493 -1.147174 6.229457

6 4.225745 2.703820 3.316223

6 4.951250 2.984365 2.182073

6 4.534942 2.507671 0.910442

6 3.361255 1.689510 0.814786

6 2.629046 1.439633 2.004891

6 3.042721 1.935999 3.219657

1 6.124988 3.483790 -0.181189

1 4.548365 3.081986 4.280759

1 5.850252 3.591177 2.237703

6 5.239576 2.860993 -0.269541

6 2.956160 1.218448 -0.480729

1 1.707842 0.879262 1.952076

1 2.450017 1.742523 4.107502

6 3.648199 1.631029 -1.605593

6 4.795303 2.448277 -1.502088

1 3.307911 1.338093 -2.589833

1 5.318421 2.744871 -2.405035

1 0.937897 -3.977106 2.161766

6 0.032386 2.932563 -1.037242

6 -0.688246 3.533535 -2.086263

6 1.022355 3.708584 -0.415332

6 -0.433138 4.847555 -2.487303

1 -1.455713 2.973169 -2.607569

6 1.279125 5.026697 -0.809835

1 1.604072 3.304883 0.401246

6 0.553634 5.602962 -1.850396

1 -1.003178 5.277510 -3.306843

1 2.056271 5.592456 -0.302352

1 0.755515 6.622174 -2.165753

5 -0.851722 3.337158 1.874845

8 -0.524313 1.998621 1.984374

1 -1.212827 1.396508 2.303656

6 -2.864262 3.119757 0.476515

8 -2.567370 2.048577 -0.043656

8 -2.082509 3.779493 1.337394

6 -4.143861 3.828416 0.167260

1 -4.570147 4.277227 1.066461

1 -3.915329 4.638589 -0.535047

1 -4.844457 3.138094 -0.300807

8 -0.016084 4.252219 2.386433

1 -0.226909 5.156382 2.121707

----------------------------------------------------------------------------------------------------------------

**E**

----------------------------------------------------------------------------------------------------------------

Number of imaginary frequencies = 0

Electronic energy: HF=-3693.0596654

Zero-point correction = 1.045066 (Hartree/Particle)

Thermal correction to Energy = 1.109842

Thermal correction to Enthalpy = 1.110786

Thermal correction to Gibbs Free Energy = 0.944070

Sum of electronic and zero-point Energies = -3692.014599

Sum of electronic and thermal Energies = -3691.949823

Sum of electronic and thermal Enthalpies = -3691.948879

Sum of electronic and thermal Free Energies = -3692.115595

......................................................................................................................................................

Cartesian Coordinates

......................................................................................................................................................

45 0.200610 -0.050698 -1.005168

26 -4.094213 0.485702 2.093194

15 -1.944432 -0.648444 -0.588812

15 0.319740 1.535802 0.824974

6 -2.062467 1.433565 -2.303033

6 -0.646415 1.399070 -2.109004

6 2.475253 5.236189 -0.853498

1 2.989283 6.082809 -1.302330

6 -2.885345 0.453736 -1.685024

6 -1.829406 3.380698 -3.773971

1 -2.276002 4.132452 -4.417924

6 1.158568 3.063723 0.294406

6 -5.922062 0.423062 1.116278

1 -6.190059 -0.293437 0.353816

6 1.160024 1.023482 2.367555

6 -2.666425 2.421366 -3.144088

6 1.838821 1.938196 3.189305

1 1.936661 2.973334 2.881456

6 0.126869 2.345842 -2.753998

1 1.203806 2.341676 -2.633480

6 -4.071905 2.374409 -3.336925

1 -4.535839 3.118517 -3.978377

6 2.244255 0.193237 4.796723

6 1.565184 -0.734645 4.004494

6 1.026920 -0.304003 2.786022

1 0.502975 -1.012614 2.158307

6 -4.843133 1.394581 -2.744925

1 -5.914189 1.365944 -2.917398

6 -2.398742 0.492972 3.276591

6 -0.466596 3.333326 -3.582027

1 0.174735 4.059422 -4.073053

6 -2.064143 0.789366 1.921108

6 3.233368 4.197541 -0.290964

6 -2.459085 -0.350441 1.122007

6 1.080445 5.211444 -0.852270

6 2.390797 1.532119 4.406289

6 -1.385155 2.036592 1.421710

1 -1.898189 2.373169 0.513913

6 -1.361199 3.161534 2.459282

1 -0.787591 2.868626 3.341821

1 -2.380080 3.397235 2.776742

1 -0.907480 4.065776 2.051621

6 -4.248064 0.425176 -1.905983

1 -4.863524 -0.332472 -1.435940

6 -5.599813 1.404274 3.178536

1 -5.559927 1.558856 4.247713

6 -3.076697 -1.303225 2.002446

1 -3.499222 -2.248862 1.700172

6 -5.106820 2.298390 2.181866

1 -4.641175 3.256570 2.363569

6 -6.109030 0.247860 2.517805

1 -6.521754 -0.627909 2.998737

6 0.431199 4.111746 -0.274160

1 -0.652118 4.073174 -0.309406

6 0.269577 6.322359 -1.470017

1 -0.274646 6.887578 -0.704913

1 -0.472562 5.917223 -2.165661

1 0.903504 7.025540 -2.015459

6 2.562911 3.111451 0.271861

1 3.140723 2.300820 0.704392

6 4.740550 4.272117 -0.277897

1 5.134813 4.530980 -1.266151

1 5.186316 3.322085 0.025759

1 5.088581 5.044143 0.417761

6 -5.299936 1.693121 0.908056

1 -5.003278 2.107223 -0.043341

6 -3.021818 -0.787386 3.324307

1 -3.439703 -1.255891 4.204230

6 3.127747 2.509677 5.288348

1 2.698897 2.535620 6.295538

1 4.181470 2.228695 5.394636

1 3.090765 3.522404 4.879556

1 2.667716 -0.129550 5.745079

6 1.424284 -2.175682 4.429280

1 1.637318 -2.302994 5.493468

1 0.411245 -2.544487 4.239570

1 2.119887 -2.815916 3.873505

6 -0.725655 -5.689255 1.190619

6 -1.509850 -5.899966 0.080827

6 -2.057340 -4.810607 -0.647674

6 -1.799362 -3.468622 -0.212760

6 -0.967503 -3.291187 0.924294

6 -0.450809 -4.367649 1.610651

1 -3.011073 -6.055737 -2.134657

1 -0.317868 -6.530291 1.742175

1 -1.722867 -6.908697 -0.260750

6 -2.833908 -5.033337 -1.813972

6 -2.364491 -2.384865 -0.967577

1 -0.734578 -2.291692 1.258924

1 0.165315 -4.197627 2.488289

6 -3.094309 -2.652667 -2.111807

6 -3.334360 -3.977624 -2.535042

1 -3.465659 -1.838457 -2.719776

1 -3.908288 -4.149445 -3.439365

1 -2.260293 1.156271 4.117124

6 0.080861 -1.351714 -2.642487

6 -0.330489 -0.971008 -3.927765

6 0.429494 -2.700980 -2.447447

6 -0.395594 -1.897827 -4.973073

1 -0.609218 0.054728 -4.133924

6 0.360711 -3.629193 -3.488458

1 0.720075 -3.055345 -1.465911

6 -0.055740 -3.232901 -4.758891

1 -0.717479 -1.568525 -5.957546

1 0.622167 -4.666555 -3.296673

1 -0.116189 -3.953549 -5.568863

6 5.040924 -2.042334 0.283037

6 3.656008 -2.295473 0.463536

6 3.204649 -3.399978 1.205654

6 4.116672 -4.265216 1.790776

6 5.485264 -4.022813 1.630331

6 5.937976 -2.933354 0.887789

1 2.136123 -3.561358 1.289897

1 3.774147 -5.123380 2.358831

1 6.209875 -4.693147 2.081343

6 5.497645 -0.882869 -0.516582

6 6.855730 -0.580546 -0.681573

6 4.560425 -0.026561 -1.154973

6 7.266711 0.511281 -1.444991

6 4.981218 1.072604 -1.923023

6 6.333071 1.343499 -2.071113

1 8.327771 0.713204 -1.550866

1 4.225352 1.698956 -2.382622

1 6.662091 2.191004 -2.662139

6 2.679324 -1.406747 -0.129534

6 3.141259 -0.270680 -0.998349

8 1.453103 -1.511780 0.054036

8 2.258720 0.446069 -1.507059

1 7.614705 -1.194156 -0.213268

1 7.006135 -2.792984 0.781639

----------------------------------------------------------------------------------------------------------------

**E1**

----------------------------------------------------------------------------------------------------------------

Number of imaginary frequencies: 0

Electronic energy: HF = -3769.5041674

Zero-point correction = 1.071312 (Hartree/Particle)

Thermal correction to Energy = 1.138253

Thermal correction to Enthalpy = 1.139197

Thermal correction to Gibbs Free Energy = 0.969198

Sum of electronic and zero-point Energies = -3768.432856

Sum of electronic and thermal Energies = -3768.365914

Sum of electronic and thermal Enthalpies = -3768.364970

Sum of electronic and thermal Free Energies = -3768.534969

......................................................................................................................................................

Cartesian Coordinates

......................................................................................................................................................

45 0.425031 -0.204496 0.131269

26 -4.733282 -0.118470 -1.079468

15 -1.368590 -1.346052 -0.637896

15 -0.805995 1.831781 0.628306

6 -0.256000 -0.217694 -2.809490

6 0.548191 0.404442 -1.802610

6 1.953481 5.328046 -0.551561

1 2.637038 6.125301 -0.834731

6 -1.221248 -1.189879 -2.439005

6 0.854612 1.094189 -4.560543

1 0.980820 1.349605 -5.608389

6 0.193416 3.291943 0.178500

6 -5.251599 -1.130028 -2.813545

1 -4.921812 -2.125577 -3.070086

6 -1.449024 2.209038 2.297986

6 -0.103152 0.112046 -4.195026

6 -1.625611 3.529573 2.743426

1 -1.277555 4.357673 2.135960

6 1.462194 1.353801 -2.216934

1 2.088588 1.847742 -1.490906

6 -0.901864 -0.575941 -5.145508

1 -0.780505 -0.336984 -6.198379

6 -2.716439 2.714366 4.727013

6 -2.557224 1.393208 4.306099

6 -1.911868 1.153883 3.086883

1 -1.763271 0.137502 2.752271

6 -1.809501 -1.539885 -4.755681

1 -2.404700 -2.060872 -5.498596

6 -4.486687 0.870665 0.719323

6 1.615333 1.696474 -3.585289

1 2.356187 2.443663 -3.855984

6 -3.241988 0.768465 0.028497

6 2.030915 4.789600 0.742246

6 -2.958949 -0.642033 -0.133013

6 1.021552 4.867611 -1.484169

6 -2.251314 3.794465 3.962994

6 -2.370287 1.917451 -0.407054

1 -2.027923 1.729490 -1.430630

6 -3.093490 3.264808 -0.335561

1 -3.383810 3.500365 0.690558

1 -3.997751 3.236489 -0.948769

1 -2.458654 4.075561 -0.694390

6 -1.983316 -1.843744 -3.387037

1 -2.720791 -2.579001 -3.087653

6 -6.480829 0.605545 -1.920937

1 -7.228457 1.157088 -1.368256

6 -4.069316 -1.373603 0.413789

1 -4.166381 -2.448526 0.419200

6 -5.352250 1.162847 -2.593167

1 -5.102637 2.212651 -2.650738

6 -6.420548 -0.811953 -2.063367

1 -7.114888 -1.522565 -1.637221

6 0.143083 3.844047 -1.103871

1 -0.559524 3.465271 -1.837384

6 0.947477 5.443934 -2.875876

1 0.876539 4.647398 -3.623732

1 1.825357 6.053391 -3.104688

1 0.062886 6.080226 -2.994096

6 1.148706 3.765644 1.092418

1 1.206443 3.330387 2.085265

6 3.079340 5.273670 1.713799

1 2.829308 4.997013 2.741146

1 3.192358 6.360873 1.670720

1 4.058409 4.835702 1.483309

6 -4.589092 0.093722 -3.140775

1 -3.660686 0.188492 -3.682540

6 -4.994164 -0.439811 0.950795

1 -5.947849 -0.679632 1.399464

6 -2.422616 5.210561 4.454877

1 -1.755454 5.416108 5.299923

1 -2.196524 5.936144 3.669386

1 -3.445317 5.391032 4.800747

1 -3.215544 2.912591 5.672709

6 -3.055165 0.239040 5.140835

1 -3.701511 0.580696 5.952925

1 -3.625086 -0.470531 4.531571

1 -2.219057 -0.308321 5.592694

6 -1.839270 -4.523516 3.808871

6 -1.585766 -5.405338 2.784534

6 -1.458158 -4.957334 1.442604

6 -1.618475 -3.563131 1.143878

6 -1.896468 -2.685462 2.227653

6 -1.995171 -3.148102 3.522985

1 -1.026334 -6.918941 0.643643

1 -1.925543 -4.877657 4.830714

1 -1.466899 -6.465669 2.987501

6 -1.141591 -5.866749 0.400466

6 -1.435510 -3.124160 -0.211997

1 -2.063592 -1.636668 2.028724

1 -2.206903 -2.449697 4.325388

6 -1.092660 -4.047738 -1.184328

6 -0.962567 -5.420991 -0.885796

1 -0.883078 -3.717319 -2.192668

1 -0.699945 -6.113323 -1.678573

1 -4.990264 1.791670 0.970957

6 1.649435 -1.833064 -0.347059

6 2.650465 -1.730055 -1.333679

6 1.627945 -3.023264 0.398342

6 3.562222 -2.766324 -1.574168

1 2.718013 -0.837697 -1.944604

6 2.534218 -4.059301 0.168482

1 0.889258 -3.171716 1.176833

6 3.506605 -3.939393 -0.828860

1 4.317913 -2.643921 -2.345199

1 2.473519 -4.964465 0.766754

1 4.212726 -4.743598 -1.009394

6 5.997150 -0.924644 0.297627

6 5.051468 -1.492025 1.185944

6 5.241807 -2.769607 1.725882

6 6.357624 -3.519812 1.370856

6 7.280082 -2.984387 0.471592

6 7.105097 -1.702171 -0.053602

1 4.490315 -3.158228 2.402034

1 6.501878 -4.514478 1.778542

1 8.148038 -3.564563 0.174838

6 5.808099 0.453705 -0.202984

6 6.811388 1.141826 -0.897747

6 4.577742 1.129118 0.003761

6 6.608239 2.440644 -1.362939

6 4.378289 2.436613 -0.471048

6 5.391685 3.097007 -1.149302

1 7.411585 2.945896 -1.889756

1 3.431040 2.922463 -0.273847

1 5.240772 4.111636 -1.502076

6 3.827892 -0.770581 1.525465

6 3.478615 0.449384 0.675699

8 3.107854 -1.070828 2.477969

8 2.315964 0.874546 0.620933

1 7.843629 -1.321336 -0.748447

1 7.773244 0.674653 -1.069302

8 0.484207 -0.761097 2.309826

1 0.137122 -1.645983 2.494599

1 1.457602 -0.799805 2.482184

----------------------------------------------------------------------------------------------------------------

**E2**

----------------------------------------------------------------------------------------------------------------

Number of imaginary frequencies: 0

Electronic energy: HF = -3769.4832103

Zero-point correction = 1.070782 (Hartree/Particle)

Thermal correction to Energy = 1.138257

Thermal correction to Enthalpy = 1.139201

Thermal correction to Gibbs Free Energy = 0.966838

Sum of electronic and zero-point Energies = -3768.412429

Sum of electronic and thermal Energies = -3768.344953

Sum of electronic and thermal Enthalpies = -3768.344009

Sum of electronic and thermal Free Energies = -3768.516372

......................................................................................................................................................

Cartesian Coordinates

......................................................................................................................................................

45 0.101242 0.595262 -0.808152

26 -4.160783 -2.078103 0.457147

15 -0.725862 -1.498833 -0.458495

15 -1.395415 1.633357 0.781886

6 -1.641492 -0.734263 -2.847070

6 -1.194322 0.531099 -2.354568

6 -1.537143 5.949316 -0.811174

1 -1.513440 6.949198 -1.237228

6 -1.380691 -1.913515 -2.102980

6 -2.687475 0.364954 -4.772274

1 -3.239339 0.304641 -5.705343

6 -1.590477 3.375179 0.267832

6 -4.823512 -3.351504 -1.035313

1 -4.255921 -4.180337 -1.430882

6 -0.947224 1.760577 2.548143

6 -2.364233 -0.830091 -4.077683

6 -1.701728 2.571691 3.412112

1 -2.537586 3.146251 3.028561

6 -1.538761 1.667913 -3.059654

1 -1.198768 2.640763 -2.734127

6 -2.723881 -2.122440 -4.545436

1 -3.251098 -2.206397 -5.491369

6 -0.244954 1.985820 5.230965

6 0.546374 1.202937 4.386093

6 0.176878 1.085071 3.038347

1 0.795966 0.497238 2.374007

6 -2.425113 -3.254931 -3.816158

1 -2.711544 -4.232533 -4.190296

6 -3.764195 -1.130196 2.247506

6 -2.296749 1.579348 -4.258101

1 -2.542046 2.496111 -4.787199

6 -2.985199 -0.564641 1.190340

6 -0.614429 5.611901 0.189108

6 -2.147455 -1.623531 0.667431

6 -2.488201 5.035301 -1.272115

6 -1.368649 2.680076 4.763724

6 -3.087637 0.857208 0.692069

1 -3.268837 0.824118 -0.388287

6 -4.220251 1.634374 1.367864

1 -4.090141 1.662772 2.450996

1 -5.177030 1.148975 1.155574

1 -4.270126 2.662025 1.004300

6 -1.771531 -3.153270 -2.565995

1 -1.592870 -4.046160 -1.976877

6 -6.220729 -2.081415 0.292469

1 -6.887128 -1.780121 1.088636

6 -2.481667 -2.829312 1.375621

1 -2.032740 -3.795749 1.204192

6 -5.654081 -1.225680 -0.700082

1 -5.824761 -0.162372 -0.796308

6 -5.709331 -3.396179 0.081775

1 -5.920722 -4.263060 0.692116

6 -2.501039 3.744360 -0.726220

1 -3.212942 3.022599 -1.110890

6 -3.488178 5.416178 -2.334575

1 -3.672529 4.583061 -3.019752

1 -3.144712 6.273098 -2.919146

1 -4.450906 5.687226 -1.885594

6 -0.646040 4.317220 0.719902

1 0.047782 4.044761 1.510759

6 0.373890 6.631325 0.698679

1 1.193899 6.157018 1.244882

1 -0.112534 7.334833 1.384038

1 0.798303 7.220226 -0.119973

6 -4.792267 -2.008749 -1.518928

1 -4.199121 -1.643926 -2.341352

6 -3.458371 -2.517012 2.354986

1 -3.928991 -3.219107 3.028408

6 -2.197765 3.521948 5.702037

1 -1.565597 4.141749 6.345255

1 -2.875465 4.181694 5.153917

1 -2.807617 2.891754 6.359743

1 0.032277 2.078116 6.279037

6 1.800813 0.540929 4.903494

1 2.583879 1.288364 5.079572

1 1.620650 0.039164 5.859820

1 2.187713 -0.190059 4.192783

6 1.542284 -3.599978 4.116843

6 2.066440 -4.350933 3.091360

6 1.696918 -4.104034 1.742329

6 0.765229 -3.052009 1.443546

6 0.266524 -2.285598 2.529893

6 0.633995 -2.557664 3.826859

1 2.950530 -5.667962 0.936011

1 1.824980 -3.802637 5.144824

1 2.767991 -5.154686 3.296619

6 2.244814 -4.879724 0.688529

6 0.394868 -2.843283 0.070458

1 -0.410310 -1.465771 2.346074

1 0.227740 -1.953228 4.630583

6 0.968188 -3.622420 -0.923791

6 1.893727 -4.641845 -0.618601

1 0.725948 -3.434939 -1.961619

1 2.320259 -5.231163 -1.423450

1 -4.516327 -0.610317 2.821123

6 1.537218 -0.106436 -2.132295

6 1.710666 0.484587 -3.396224

6 2.511091 -1.029868 -1.720767

6 2.817780 0.179941 -4.195458

1 0.974582 1.187041 -3.772558

6 3.613309 -1.349493 -2.520328

1 2.408622 -1.538347 -0.772463

6 3.776000 -0.738310 -3.761445

1 2.923917 0.658009 -5.165722

1 4.341108 -2.071845 -2.162179

1 4.630311 -0.978378 -4.387094

6 5.736940 -0.380465 -0.133123

6 4.827136 -1.089945 0.684860

6 5.051143 -2.427234 1.031402

6 6.172653 -3.093624 0.550822

6 7.072393 -2.410291 -0.270940

6 6.860710 -1.071931 -0.602634

1 4.319832 -2.921758 1.660659

1 6.344193 -4.134234 0.804864

1 7.947426 -2.921137 -0.659925

6 5.490472 1.040970 -0.464346

6 6.447008 1.827452 -1.121862

6 4.259060 1.658932 -0.129106

6 6.202683 3.164433 -1.426297

6 4.026676 3.011556 -0.427169

6 4.991773 3.769509 -1.073689

1 6.969702 3.742740 -1.931278

1 3.091980 3.457183 -0.103515

1 4.817361 4.817806 -1.290874

6 3.584350 -0.454607 1.144959

6 3.195654 0.876299 0.499612

8 2.848006 -0.924828 1.998262

8 2.023625 1.257397 0.560530

1 7.577124 -0.580867 -1.249468

1 7.406043 1.404263 -1.392935

8 0.768416 2.610762 -1.508297

1 1.725042 2.530118 -1.637460

1 0.613924 3.281684 -0.819385

----------------------------------------------------------------------------------------------------------------

**E3**

----------------------------------------------------------------------------------------------------------------

Number of imaginary frequencies: 0

Electronic energy: HF = -3945.5758979

Zero-point correction = 1.096980 (Hartree/Particle)

Thermal correction to Energy = 1.167125

Thermal correction to Enthalpy = 1.168069

Thermal correction to Gibbs Free Energy = 0.991924

Sum of electronic and zero-point Energies = -3944.478918

Sum of electronic and thermal Energies = -3944.408773

Sum of electronic and thermal Enthalpies = -3944.407829

Sum of electronic and thermal Free Energies = -3944.583973

......................................................................................................................................................

Cartesian Coordinates

......................................................................................................................................................

45 -0.512732 0.275062 -1.199853

26 -3.005112 -1.748851 2.951480

15 -1.286990 -1.596993 -0.205347

15 -0.675802 1.678158 0.802265

6 -3.401902 -0.476651 -1.414083

6 -2.469478 0.600246 -1.572499

6 -2.122620 5.668013 -1.002042

1 -2.462608 6.569762 -1.504106

6 -2.969419 -1.715755 -0.872004

6 -5.191201 0.893142 -2.381967

1 -6.221573 1.003422 -2.706103

6 -1.257478 3.328635 0.264174

6 -4.624984 -2.932504 2.433738

1 -4.580623 -3.774954 1.760615

6 0.737950 2.037380 1.908476

6 -4.762163 -0.346716 -1.839139

6 0.931312 3.305063 2.479247

1 0.230286 4.105608 2.272929

6 -2.935355 1.776850 -2.126380

1 -2.267382 2.606444 -2.312221

6 -5.612771 -1.479849 -1.739792

1 -6.642009 -1.389048 -2.075081

6 2.927859 2.514659 3.560363

6 2.741439 1.235318 3.035310

6 1.639120 1.010431 2.200442

1 1.501896 0.036148 1.749147

6 -5.148380 -2.683329 -1.249771

1 -5.810605 -3.541355 -1.197481

6 -1.399332 -0.751180 3.782515

6 -4.292199 1.925134 -2.517428

1 -4.608357 2.868171 -2.953680

6 -1.603284 -0.346670 2.426622

6 -0.751677 5.381342 -0.971405

6 -1.443165 -1.526934 1.602012

6 -3.062456 4.824579 -0.402972

6 2.031965 3.559867 3.298325

6 -1.983925 1.041163 1.971520

1 -2.874314 0.957026 1.338643

6 -2.259654 1.987447 3.143965

1 -1.364910 2.120725 3.756315

1 -3.051559 1.579929 3.777611

1 -2.572645 2.972308 2.795069

6 -3.815517 -2.803105 -0.795480

1 -3.467275 -3.742723 -0.381007

6 -4.528261 -1.649590 4.348923

1 -4.382230 -1.346857 5.376402

6 -1.209273 -2.640265 2.480742

1 -1.066022 -3.662075 2.164339

6 -4.818543 -0.785093 3.250739

1 -4.942432 0.287497 3.302110

6 -4.414717 -2.977904 3.842851

1 -4.166011 -3.857228 4.420430

6 -2.616793 3.650344 0.218512

1 -3.355757 2.973448 0.630453

6 -4.536123 5.139500 -0.439891

1 -5.110515 4.269408 -0.774216

1 -4.751550 5.972820 -1.112594

1 -4.905190 5.410077 0.555868

6 -0.333336 4.209151 -0.330012

1 0.729229 4.000322 -0.264451

6 0.263584 6.298386 -1.606148

1 0.950291 5.732520 -2.243286

1 0.860267 6.809402 -0.841392

1 -0.219385 7.065451 -2.215808

6 -4.875090 -1.574100 2.067711

1 -5.048234 -1.207240 1.067948

6 -1.164525 -2.155851 3.813585

1 -1.033509 -2.756710 4.702379

6 2.267916 4.932231 3.877936

1 3.190685 5.371531 3.481706

1 1.445534 5.612437 3.643117

1 2.373483 4.892259 4.966908

1 3.792916 2.705635 4.191009

6 3.708146 0.122038 3.350147

1 4.615242 0.504688 3.824129

1 3.258364 -0.606948 4.034291

1 4.006186 -0.414848 2.446002

6 3.344340 -4.245680 1.206611

6 2.801289 -4.999368 0.194792

6 1.569024 -4.634618 -0.412360

6 0.877536 -3.460727 0.036739

6 1.490554 -2.690012 1.060487

6 2.680683 -3.073728 1.635419

1 1.565603 -6.296649 -1.791688

1 4.281257 -4.536583 1.669715

1 3.302680 -5.896127 -0.157613

6 1.021218 -5.417616 -1.459311

6 -0.379317 -3.134922 -0.577486

1 1.002152 -1.793686 1.410548

1 3.110093 -2.474983 2.430092

6 -0.862578 -3.921120 -1.611158

6 -0.167736 -5.066215 -2.050905

1 -1.775170 -3.641136 -2.120867

1 -0.576789 -5.655249 -2.864679

1 -1.482433 -0.111464 4.647992

6 -0.452138 -0.786456 -2.999991

6 -1.332766 -0.543701 -4.069654

6 0.599005 -1.693353 -3.222131

6 -1.169190 -1.182248 -5.302082

1 -2.153196 0.153262 -3.960280

6 0.768768 -2.325155 -4.460054

1 1.302436 -1.922165 -2.435057

6 -0.117929 -2.077234 -5.505600

1 -1.867626 -0.970585 -6.107219

1 1.598316 -3.014410 -4.590165

1 0.008668 -2.567925 -6.465870

6 5.705610 -0.277371 0.217194

6 5.144948 -1.428265 -0.383226

6 5.836841 -2.646039 -0.392442

6 7.078404 -2.753148 0.221472

6 7.629312 -1.630798 0.845632

6 6.954949 -0.411107 0.839645

1 5.365069 -3.493316 -0.875616

1 7.612062 -3.697637 0.221111

1 8.593833 -1.702137 1.338187

6 4.990648 1.017401 0.156564

6 5.579229 2.210139 0.598415

6 3.667011 1.090452 -0.346423

6 4.895126 3.422364 0.536738

6 2.989751 2.316431 -0.405618

6 3.596298 3.484910 0.025436

1 5.386128 4.326485 0.882691

1 1.983379 2.319096 -0.795765

1 3.071672 4.432236 -0.030895

6 3.808549 -1.387617 -1.002515

6 2.964811 -0.121210 -0.767756

8 3.352204 -2.294413 -1.678288

8 1.749980 -0.185863 -0.952859

1 7.415970 0.436089 1.332109

1 6.590810 2.208407 0.984136

5 1.216701 2.229197 -3.255039

8 0.134428 2.065872 -2.384081

1 -0.153318 2.910053 -1.992066

8 1.673182 3.513349 -3.384639

1 2.393735 3.570598 -4.023678

8 1.796130 1.189533 -3.883933

1 1.344311 0.335297 -3.754043

----------------------------------------------------------------------------------------------------------------

**E4**

----------------------------------------------------------------------------------------------------------------

Number of imaginary frequencies: 0

Electronic energy: HF = -3945.5691713

Zero-point correction = 1.095937 (Hartree/Particle)

Thermal correction to Energy = 1.166619

Thermal correction to Enthalpy = 1.167563

Thermal correction to Gibbs Free Energy = 0.986263

Sum of electronic and zero-point Energies = -3944.473234

Sum of electronic and thermal Energies = -3944.402552

Sum of electronic and thermal Enthalpies = -3944.401608

Sum of electronic and thermal Free Energies = -3944.582909

......................................................................................................................................................

Cartesian Coordinates

......................................................................................................................................................

45 0.146150 -0.186929 -0.571573

26 -4.887092 0.681440 0.929419

15 -2.024078 -0.829370 -0.691776

15 -0.281937 1.663749 0.929275

6 -1.642776 0.933040 -2.705016

6 -0.358995 1.044239 -2.087954

6 2.140512 5.135256 -0.863049

1 2.730538 5.903860 -1.356608

6 -2.593851 0.007986 -2.200194

6 -1.043005 2.676358 -4.323717

1 -1.296492 3.291682 -5.181816

6 0.628936 3.145538 0.379695

6 -6.321933 0.453065 -0.551908

1 -6.387999 -0.387720 -1.226309

6 0.108865 1.375734 2.693187

6 -1.991883 1.740063 -3.835955

6 0.913290 2.222908 3.456182

1 1.300956 3.138134 3.023966

6 0.525614 1.977521 -2.595107

1 1.498982 2.109417 -2.140653

6 -3.267681 1.555154 -4.429552

1 -3.532109 2.156992 -5.294553

6 0.739045 0.716932 5.330752

6 -0.092247 -0.139160 4.599860

6 -0.408056 0.207270 3.282921

1 -1.111656 -0.409835 2.733272

6 -4.159652 0.625475 -3.934940

1 -5.127321 0.492412 -4.407784

6 -3.691818 0.885469 2.596755

6 0.182760 2.787348 -3.708404

1 0.909836 3.508114 -4.071310

6 -2.911375 0.984820 1.404475

6 2.787903 4.182809 -0.062446

6 -3.049951 -0.270077 0.695777

6 0.758177 5.112308 -1.052710

6 1.238855 1.900590 4.780333

6 -2.083997 2.171919 0.985549

1 -2.328148 2.409242 -0.055877

6 -2.321922 3.394348 1.878571

1 -2.014751 3.187334 2.906797

1 -3.383128 3.657074 1.883612

1 -1.754309 4.257901 1.531438

6 -3.827143 -0.149258 -2.801285

1 -4.543468 -0.857918 -2.403483

6 -6.590953 1.793955 1.305414

1 -6.873946 2.141532 2.289162

6 -3.962413 -1.090311 1.445459

1 -4.290845 -2.077500 1.160605

6 -5.754066 2.485189 0.378843

1 -5.300807 3.454212 0.533076

6 -6.945928 0.540414 0.725941

1 -7.544983 -0.228043 1.194173

6 0.011140 4.106143 -0.425913

1 -1.054050 4.062078 -0.622972

6 0.067895 6.109751 -1.948715

1 -0.448094 5.596507 -2.767822

1 0.778486 6.816406 -2.384006

1 -0.684730 6.685308 -1.399047

6 2.021889 3.191616 0.551217

1 2.510102 2.431278 1.146411

6 4.283908 4.226513 0.132624

1 4.659724 3.284020 0.541232

1 4.569440 5.023436 0.829031

1 4.803524 4.421205 -0.810691

6 -5.583084 1.658045 -0.766554

1 -4.979323 1.887590 -1.630867

6 -4.337226 -0.384258 2.618233

1 -5.040872 -0.724968 3.364617

6 2.140037 2.807883 5.579764

1 3.190837 2.640534 5.314840

1 1.920288 3.861284 5.382904

1 2.037363 2.631352 6.653321

1 0.994374 0.459560 6.355629

6 -0.604992 -1.426417 5.194043

1 -0.741803 -1.344560 6.275467

1 -1.560984 -1.716782 4.748468

1 0.110919 -2.237619 5.012751

6 -1.626340 -5.479605 2.217488

6 -2.073893 -5.886803 0.982859

6 -2.324898 -4.947086 -0.052133

6 -2.136609 -3.547265 0.201887

6 -1.669473 -3.169628 1.488242

6 -1.414316 -4.104357 2.465883

1 -2.858662 -6.442712 -1.517958

1 -1.430237 -6.207538 2.997972

1 -2.232201 -6.940547 0.772774

6 -2.723154 -5.379333 -1.343224

6 -2.373561 -2.618010 -0.868647

1 -1.496863 -2.126277 1.698519

1 -1.047088 -3.781262 3.433945

6 -2.722227 -3.095399 -2.120374

6 -2.908550 -4.473698 -2.358519

1 -2.830486 -2.410199 -2.950039

1 -3.187845 -4.807071 -3.352370

1 -3.819633 1.666780 3.330400

6 0.579785 -1.707047 -1.938375

6 0.981167 -1.427581 -3.255687

6 0.589929 -3.056738 -1.543952

6 1.380876 -2.443241 -4.128986

1 0.977126 -0.406200 -3.616376

6 0.991270 -4.078688 -2.412442

1 0.252155 -3.335366 -0.553134

6 1.391176 -3.775118 -3.712597

1 1.683808 -2.188792 -5.141441

1 0.979600 -5.108486 -2.066419

1 1.699706 -4.563041 -4.392741

6 6.145245 -0.719000 0.176935

6 5.194393 -0.495563 1.199926

6 5.488909 -0.776900 2.541247

6 6.729052 -1.294885 2.891387

6 7.677048 -1.524624 1.890160

6 7.390023 -1.240054 0.555936

1 4.718069 -0.589666 3.280887

1 6.959653 -1.520118 3.927219

1 8.649404 -1.932271 2.147733

6 5.814696 -0.410325 -1.232959

6 6.762113 -0.518887 -2.258813

6 4.502348 -0.012490 -1.598306

6 6.424357 -0.258727 -3.586464

6 4.165345 0.232932 -2.940079

6 5.123268 0.113870 -3.936116

1 7.186077 -0.351507 -4.354150

1 3.144773 0.514592 -3.168118

1 4.866525 0.308040 -4.971819

6 3.861148 0.028182 0.886204

6 3.459463 0.118268 -0.588198

8 3.063060 0.398424 1.738001

8 2.285068 0.335377 -0.895451

1 8.149731 -1.442506 -0.188567

1 7.781643 -0.805434 -2.033764

5 2.070370 -2.243846 1.384127

8 0.915662 -1.498708 1.175252

1 0.651137 -1.070024 2.008868

8 2.429718 -2.479148 2.680220

1 3.232894 -3.010754 2.730690

8 2.833086 -2.684117 0.347853

1 2.373625 -2.640121 -0.510107

----------------------------------------------------------------------------------------------------------------

**E5**

----------------------------------------------------------------------------------------------------------------

Number of imaginary frequencies: 0

Electronic energy: HF = -3922.1804331

Zero-point correction = 1.109140 (Hartree/Particle)

Thermal correction to Energy = 1.179645

Thermal correction to Enthalpy = 1.180589

Thermal correction to Gibbs Free Energy = 1.001821

Sum of electronic and zero-point Energies = -3921.071293

Sum of electronic and thermal Energies = -3921.000788

Sum of electronic and thermal Enthalpies = -3920.999844

Sum of electronic and thermal Free Energies = -3921.178612

......................................................................................................................................................

Cartesian Coordinates

......................................................................................................................................................

45 0.419473 -0.074184 0.163836

26 -4.519935 -0.286610 -1.630535

15 -1.210649 -1.360454 -0.705247

15 -0.930314 1.923337 0.451758

6 0.052357 -0.273460 -2.816585

6 0.694900 0.454671 -1.766565

6 1.889089 5.384829 -0.660390

1 2.607910 6.153477 -0.935268

6 -0.875135 -1.294032 -2.490171

6 1.275105 1.017883 -4.505035

1 1.510829 1.222637 -5.545109

6 0.052734 3.405021 0.042315

6 -4.758801 -1.369161 -3.383168

1 -4.366100 -2.359741 -3.555478

6 -1.754868 2.290867 2.045175

6 0.344395 -0.009155 -4.192525

6 -1.820102 3.579483 2.590731

1 -1.320260 4.404553 2.096219

6 1.573476 1.454207 -2.128317

1 2.055529 2.041234 -1.364476

6 -0.289494 -0.808007 -5.179655

1 -0.065489 -0.620768 -6.226137

6 -3.207858 2.757857 4.379103

6 -3.177424 1.466165 3.844545

6 -2.436083 1.244728 2.680088

1 -2.407273 0.251018 2.254920

6 -1.164586 -1.817045 -4.829629

1 -1.631683 -2.423415 -5.598908

6 -4.575569 0.760962 0.145666

6 1.870134 1.729390 -3.488536

1 2.588733 2.511483 -3.717240

6 -3.242783 0.703119 -0.364648

6 1.898968 4.876694 0.648637

6 -2.873495 -0.697406 -0.427415

6 0.981955 4.928045 -1.617466

6 -2.533964 3.822957 3.768837

6 -2.389256 1.893715 -0.725605

1 -1.939491 1.717220 -1.708707

6 -3.185764 3.202088 -0.731091

1 -3.570834 3.427720 0.266149

1 -4.033500 3.123963 -1.416647

1 -2.567238 4.043731 -1.043411

6 -1.471886 -2.059973 -3.472180

1 -2.177569 -2.839196 -3.209837

6 -6.151782 0.350410 -2.733292

1 -6.985667 0.892936 -2.310272

6 -4.014442 -1.465913 -0.011664

1 -4.059836 -2.543302 0.023288

6 -4.955765 0.924763 -3.259005

1 -4.729869 1.980170 -3.315351

6 -6.030747 -1.067968 -2.816300

1 -6.757138 -1.788214 -2.466673

6 0.065131 3.932545 -1.251140

1 -0.607741 3.547351 -2.008606

6 0.984302 5.464347 -3.026973

1 1.005064 4.645630 -3.754182

1 1.848662 6.107590 -3.209609

1 0.082823 6.053992 -3.228023

6 0.979154 3.883369 0.985324

1 0.991739 3.470564 1.988610

6 2.900689 5.380120 1.658852

1 2.796683 4.861481 2.615118

1 2.775834 6.452745 1.841615

1 3.927403 5.231926 1.305640

6 -4.092281 -0.134456 -3.656491

1 -3.099783 -0.025421 -4.065714

6 -5.048067 -0.565724 0.355466

1 -6.042585 -0.840773 0.677268

6 -2.571497 5.204557 4.373664

1 -1.846510 5.292845 5.191480

1 -2.327123 5.971018 3.633589

1 -3.557564 5.432082 4.788832

1 -3.779847 2.943353 5.285256

6 -3.911303 0.327549 4.509264

1 -4.788661 0.682555 5.056232

1 -4.243645 -0.409891 3.772935

1 -3.267494 -0.190338 5.231094

6 -2.432793 -4.508500 3.660880

6 -1.960586 -5.389963 2.717712

6 -1.550532 -4.938953 1.434704

6 -1.646673 -3.543975 1.109298

6 -2.113763 -2.664016 2.119723

6 -2.500291 -3.129883 3.356006

1 -0.953093 -6.898901 0.749478

1 -2.745629 -4.863979 4.637286

1 -1.888514 -6.450676 2.939600

6 -1.025339 -5.848646 0.481997

6 -1.239867 -3.118514 -0.201486

1 -2.149322 -1.605767 1.918810

1 -2.862711 -2.430915 4.102609

6 -0.700382 -4.042654 -1.082054

6 -0.597087 -5.407647 -0.746231

1 -0.314340 -3.717974 -2.038265

1 -0.169897 -6.099223 -1.464538

1 -5.152158 1.661602 0.291003

6 1.649750 -1.736655 -0.114490

6 2.514952 -1.893629 -1.210395

6 1.634015 -2.760801 0.849499

6 3.305321 -3.041643 -1.355995

1 2.574671 -1.125774 -1.972765

6 2.413309 -3.906103 0.705049

1 0.992563 -2.670852 1.717706

6 3.247456 -4.058267 -0.408107

1 3.965403 -3.131400 -2.214288

1 2.362806 -4.686964 1.458969

1 3.854903 -4.950767 -0.521135

6 5.784225 -1.051361 0.095503

6 4.970856 -1.443622 1.184841

6 5.180892 -2.662073 1.836110

6 6.183131 -3.526064 1.403937

6 6.967807 -3.166456 0.309235

6 6.773323 -1.942808 -0.334203

1 4.535228 -2.914347 2.668521

1 6.341271 -4.475040 1.905022

1 7.742341 -3.837278 -0.048579

6 5.609074 0.283176 -0.514980

6 6.518971 0.806730 -1.442908

6 4.504225 1.102334 -0.156929

6 6.359381 2.087180 -1.970635

6 4.363631 2.403595 -0.677154

6 5.288839 2.900069 -1.580379

1 7.090839 2.460672 -2.680495

1 3.533166 3.011227 -0.338054

1 5.187603 3.906316 -1.972426

6 3.866955 -0.590584 1.643444

6 3.498152 0.598329 0.754048

8 3.261416 -0.742679 2.693938

8 2.385449 1.152464 0.885999

8 1.166529 1.140955 3.293809

8 0.148221 -0.611873 2.321056

6 0.415637 0.058030 3.324811

6 -0.094933 -0.299279 4.685350

1 1.638018 1.161240 2.421635

1 -0.755663 -1.161626 4.618225

1 0.753835 -0.526459 5.336956

1 -0.623618 0.558664 5.108675

1 7.404616 -1.696557 -1.179254

1 7.380361 0.226208 -1.748215

----------------------------------------------------------------------------------------------------------------

**E6**

----------------------------------------------------------------------------------------------------------------

Number of imaginary frequencies: 0

Electronic energy: HF = -3004.1511441

Zero-point correction = 0.860137 (Hartree/Particle)

Thermal correction to Energy = 0.913565

Thermal correction to Enthalpy = 0.914510

Thermal correction to Gibbs Free Energy = 0.767485

Sum of electronic and zero-point Energies = -3003.291007

Sum of electronic and thermal Energies = -3003.237579

Sum of electronic and thermal Enthalpies = -3003.236634

Sum of electronic and thermal Free Energies = -3003.383659

......................................................................................................................................................

Cartesian Coordinates

......................................................................................................................................................

45 -0.166521 0.504507 -1.397780

26 0.824489 -2.292925 2.879514

15 1.366733 -0.572531 -0.194924

15 -1.896263 0.464696 0.252006

6 0.307166 -2.360525 -1.905564

6 -0.561292 -1.265660 -2.187897

6 -6.183588 0.036652 -1.346735

1 -7.184232 -0.068058 -1.759331

6 1.389329 -2.197517 -0.998771

6 -0.982284 -3.756686 -3.451611

1 -1.143363 -4.708782 -3.947456

6 -3.618596 0.316796 -0.314783

6 1.936515 -4.011998 2.554190

1 2.893443 -4.047982 2.055172

6 -1.722265 2.083553 1.074434

6 0.108266 -3.620149 -2.551118

6 -1.713961 2.285650 2.456909

1 -1.891212 1.460448 3.133358

6 -1.605868 -1.428691 -3.071153

1 -2.278496 -0.606844 -3.298641

6 1.032383 -4.662461 -2.273985

1 0.897189 -5.623312 -2.762070

6 -1.209192 4.616721 2.117648

6 -1.202245 4.445466 0.726851

6 -1.464542 3.171047 0.219315

1 -1.469945 3.025676 -0.860435

6 2.095040 -4.468795 -1.413765

1 2.794202 -5.276692 -1.224949

6 -0.140088 -0.613019 3.587465

6 -1.812495 -2.686312 -3.701218

1 -2.638132 -2.790677 -4.398617

6 -0.343958 -0.757927 2.181974

6 -5.816670 1.251526 -0.756427

6 0.963829 -0.711113 1.558766

6 -5.300339 -1.047158 -1.424553

6 -1.459408 3.555071 2.993232

6 -1.672394 -0.917172 1.490553

1 -1.604086 -1.788737 0.827909

6 -2.854416 -1.136674 2.440765

1 -3.046822 -0.269767 3.076199

1 -2.655535 -1.994742 3.088852

1 -3.764737 -1.336778 1.873849

6 2.276366 -3.228452 -0.759258

1 3.095294 -3.101841 -0.060561

6 0.331509 -3.809361 4.198959

1 -0.143579 -3.643543 5.155712

6 1.940950 -0.569297 2.605425

1 3.008788 -0.515237 2.455646

6 -0.335533 -4.011553 2.953232

1 -1.405570 -4.036732 2.801605

6 1.735402 -3.814691 3.951525

1 2.509760 -3.652548 4.688138

6 -4.012311 -0.894057 -0.905276

1 -3.312291 -1.719968 -0.978501

6 -5.724809 -2.354421 -2.046492

1 -6.259767 -2.979180 -1.321570

1 -4.860466 -2.924684 -2.398703

1 -6.397657 -2.192378 -2.893178

6 -4.521497 1.383390 -0.241656

1 -4.219753 2.320874 0.214108

6 -6.804599 2.387274 -0.657728

1 -7.506266 2.223584 0.168521

1 -7.397368 2.479120 -1.572378

1 -6.301410 3.341064 -0.479543

6 0.653195 -4.134745 1.936831

1 0.465357 -4.269342 0.882730

6 1.257196 -0.503057 3.844567

1 1.718797 -0.436977 4.819538

6 -1.478429 3.768003 4.485901

1 -2.500604 3.942228 4.841880

1 -1.091813 2.893015 5.016354

1 -0.879050 4.635198 4.773983

1 -1.005456 5.602707 2.528385

6 -0.855787 5.588357 -0.192631

1 -1.263743 5.435602 -1.195289

1 -1.233685 6.540127 0.190109

1 0.232879 5.682352 -0.289533

6 3.516176 4.216887 1.168777

6 4.551190 3.555014 0.549294

6 4.389949 2.225777 0.078059

6 3.134233 1.561001 0.263830

6 2.087782 2.275127 0.906767

6 2.272779 3.568786 1.344853

1 6.389158 2.075411 -0.728985

1 3.651011 5.233649 1.523267

1 5.510344 4.043158 0.403778

6 5.444437 1.556226 -0.597137

6 2.993132 0.228222 -0.252809

1 1.123643 1.808725 1.067634

1 1.453177 4.084880 1.831879

6 4.034484 -0.372976 -0.935133

6 5.272326 0.287238 -1.095142

1 3.901056 -1.351002 -1.379649

1 6.076436 -0.210935 -1.625983

1 -0.915219 -0.647593 4.338912

6 1.254246 0.929051 -2.776812

6 1.634768 2.280157 -2.688465

6 1.811575 0.133598 -3.786445

6 2.535168 2.831821 -3.603499

1 1.255166 2.911221 -1.883615

6 2.712415 0.684309 -4.699711

1 1.542189 -0.914310 -3.868912

6 3.077618 2.030153 -4.609023

1 2.819760 3.876812 -3.521847

1 3.131188 0.061868 -5.485521

1 3.783954 2.451264 -5.317703

----------------------------------------------------------------------------------------------------------------

**FS**

----------------------------------------------------------------------------------------------------------------

Number of imaginary frequencies: 0

Electronic energy: HF = -3693.0668541

Zero-point correction = 1.046423 (Hartree/Particle)

Thermal correction to Energy = 1.110552

Thermal correction to Enthalpy = 1.111496

Thermal correction to Gibbs Free Energy = 0.946463

Sum of electronic and zero-point Energies = -3692.020431

Sum of electronic and thermal Energies = -3691.956302

Sum of electronic and thermal Enthalpies = -3691.955358

Sum of electronic and thermal Free Energies = -3692.120392

......................................................................................................................................................

Cartesian Coordinates

......................................................................................................................................................

45 0.317901 0.201624 -0.744073

26 -4.332987 -0.688582 1.769579

15 -1.749684 -0.798415 -0.780128

15 -0.249243 1.610417 0.926185

6 -1.925039 1.400210 -2.355028

6 -0.533173 1.498866 -2.047544

6 0.825520 5.725321 -0.763136

1 1.090430 6.669708 -1.232383

6 -2.714941 0.346150 -1.810178

6 -1.753591 3.389622 -3.782248

1 -2.220077 4.118779 -4.438280

6 0.145734 3.302469 0.409870

6 -5.994187 -0.996692 0.561493

1 -5.993063 -1.541780 -0.371440

6 0.628021 1.254016 2.480698

6 -2.549902 2.359100 -3.218279

6 1.381705 2.230274 3.140977

1 1.483763 3.221270 2.715565

6 0.203997 2.507959 -2.638111

1 1.257329 2.604581 -2.400659

6 -3.939270 2.230711 -3.480565

1 -4.415588 2.959019 -4.131122

6 1.841191 0.671664 4.915517

6 1.075512 -0.316644 4.282718

6 0.478376 -0.017638 3.058845

1 -0.099628 -0.779963 2.556305

6 -4.679026 1.200714 -2.937646

1 -5.738104 1.113824 -3.158312

6 -2.773441 -0.346023 3.074773

6 -0.405491 3.447542 -3.505386

1 0.203904 4.234261 -3.939895

6 -2.454404 0.171078 1.783028

6 1.846430 4.853860 -0.365526

6 -2.484993 -0.934014 0.856525

6 -0.526923 5.406290 -0.599790

6 2.005458 1.943804 4.362532

6 -2.060145 1.578447 1.430275

1 -2.602247 1.880811 0.528280

6 -2.332714 2.567679 2.570553

1 -1.755718 2.305207 3.459958

1 -3.395174 2.537449 2.826616

1 -2.071820 3.588842 2.292637

6 -4.061565 0.244755 -2.099256

1 -4.642830 -0.571576 -1.691401

6 -6.111685 -0.530035 2.816530

1 -6.188634 -0.650902 3.887991

6 -2.839916 -2.113494 1.590161

1 -2.960549 -3.099978 1.168415

6 -5.840101 0.689183 2.127628

1 -5.687911 1.655782 2.587014

6 -6.209727 -1.570862 1.847041

1 -6.376775 -2.618593 2.053919

6 -0.857691 4.186063 -0.004933

1 -1.905010 3.919386 0.081140

6 -1.610868 6.319262 -1.114319

1 -2.465483 6.353097 -0.432066

1 -1.978161 5.959713 -2.082809

1 -1.244779 7.339466 -1.252851

6 1.494549 3.633300 0.216111

1 2.265994 2.908947 0.448574

6 3.299565 5.203526 -0.569085

1 3.425272 5.936697 -1.370119

1 3.884049 4.313191 -0.819792

1 3.732531 5.634703 0.341294

6 -5.762676 0.403210 0.733933

1 -5.541413 1.114459 -0.047836

6 -3.007389 -1.747358 2.954324

1 -3.322593 -2.406079 3.751262

6 2.852656 2.986432 5.049210

1 2.861157 2.844027 6.133047

1 3.891819 2.934148 4.703170

1 2.489643 3.996495 4.840027

1 2.317178 0.443818 5.866560

6 0.896845 -1.674954 4.915437

1 0.335298 -1.604280 5.853480

1 0.351861 -2.352878 4.252701

1 1.863493 -2.131074 5.154440

6 0.553852 -5.705424 -0.104563

6 -0.220513 -5.856879 -1.231775

6 -1.011447 -4.785197 -1.723928

6 -1.009415 -3.531269 -1.027020

6 -0.212697 -3.419081 0.141376

6 0.555909 -4.471624 0.584976

1 -1.779772 -5.886895 -3.417634

1 1.159346 -6.529854 0.258206

1 -0.235991 -6.801019 -1.768614

6 -1.783731 -4.929012 -2.905342

6 -1.792815 -2.450894 -1.558934

1 -0.180739 -2.485192 0.681080

1 1.172920 -4.349264 1.469571

6 -2.505984 -2.630553 -2.731836

6 -2.510751 -3.874046 -3.402059

1 -3.068446 -1.808244 -3.155372

1 -3.091360 -3.984513 -4.312082

1 -2.865248 0.232188 3.981824

6 2.414751 -1.216744 -2.015229

6 1.557525 -0.711558 -3.005856

6 2.638922 -2.599463 -1.948652

6 0.893874 -1.587483 -3.881011

1 1.460501 0.356257 -3.136931

6 1.988473 -3.459234 -2.827319

1 3.303763 -3.007440 -1.193721

6 1.098908 -2.957681 -3.786200

1 0.227227 -1.180008 -4.634539

1 2.149677 -4.528884 -2.746856

1 0.572302 -3.637442 -4.446516

6 5.133853 -1.295701 0.804098

6 3.780983 -1.493291 1.186964

6 3.443823 -2.232689 2.335474

6 4.433211 -2.805110 3.115286

6 5.772867 -2.635646 2.739369

6 6.114672 -1.897751 1.611069

1 2.394860 -2.340233 2.581001

1 4.178791 -3.383503 3.997203

1 6.560875 -3.086962 3.334395

6 5.474168 -0.469084 -0.374419

6 6.809673 -0.150324 -0.685143

6 4.459218 0.053451 -1.201197

6 7.125517 0.652663 -1.774028

6 4.782974 0.865062 -2.289827

6 6.108758 1.167295 -2.582329

1 8.164238 0.881773 -1.988786

1 3.977552 1.262576 -2.897301

1 6.350275 1.799276 -3.430971

6 2.720279 -0.944435 0.370766

6 2.994290 -0.236457 -0.951353

8 1.516993 -1.046847 0.683580

8 2.248219 0.951822 -0.924840

1 7.617553 -0.518204 -0.064427

1 7.162790 -1.798594 1.359485

----------------------------------------------------------------------------------------------------------------

**TS(C-D)**

----------------------------------------------------------------------------------------------------------------

Number of imaginary frequencies = 1

Electronic energy: HF = -3256.6607262

Zero-point correction = 0.910946 (Hartree/Particle)

Thermal correction to Energy = 0.968583

Thermal correction to Enthalpy = 0.969527

Thermal correction to Gibbs Free Energy = 0.818902

Sum of electronic and zero-point Energies = -3255.749781

Sum of electronic and thermal Energies = -3255.692143

Sum of electronic and thermal Enthalpies = -3255.691199

Sum of electronic and thermal Free Energies = -3255.841825

......................................................................................................................................................

Cartesian Coordinates

......................................................................................................................................................

45 -0.766813 0.650788 -0.835120

26 2.360440 -2.749757 1.681928

15 1.346243 -0.157276 -0.577546

15 -1.543369 -0.297085 1.103745

6 0.114733 -1.790121 -2.305767

6 -1.026932 -1.024912 -1.914111

6 -5.961053 -1.297372 0.360087

1 -6.999299 -1.515558 0.122808

6 1.414058 -1.458688 -1.833318

6 -1.342151 -3.249211 -3.639616

1 -1.465449 -4.093084 -4.311401

6 -3.301444 -0.726200 0.941742

6 3.510440 -3.929858 0.421572

1 4.180872 -3.557001 -0.337745

6 -1.376556 1.046171 2.324653

6 -0.039345 -2.903177 -3.194734

6 -0.846944 0.860459 3.605576

1 -0.559702 -0.124142 3.946122

6 -2.272391 -1.387184 -2.373995

1 -3.150058 -0.810800 -2.124423

6 1.126038 -3.602009 -3.606100

1 1.015473 -4.437945 -4.290814

6 -1.003068 3.228230 4.014784

6 -1.519706 3.446314 2.731570

6 -1.706107 2.345043 1.891593

1 -2.110826 2.501402 0.896153

6 2.378875 -3.234603 -3.159409

1 3.256521 -3.779979 -3.490313

6 1.475563 -1.682916 3.200175

6 -2.426169 -2.507883 -3.232123

1 -3.422451 -2.758223 -3.583652

6 0.782427 -1.479100 1.966987

6 -5.643530 -0.067626 0.951208

6 1.720418 -0.883440 1.041506

6 -4.982313 -2.251684 0.063442

6 -0.658925 1.949471 4.465532

6 -0.657109 -1.823505 1.683312

1 -0.681775 -2.447311 0.781845

6 -1.354499 -2.585101 2.817606

1 -1.437210 -1.991392 3.729841

1 -0.785535 -3.488795 3.051605

1 -2.362710 -2.879665 2.524828

6 2.526082 -2.164544 -2.249060

1 3.508379 -1.919519 -1.862795

6 2.682550 -4.642639 2.453227

1 2.607370 -4.883616 3.504382

6 2.981660 -0.768426 1.717603

1 3.886336 -0.371427 1.282143

6 1.616291 -4.676218 1.504751

1 0.593202 -4.959990 1.708823

6 3.853564 -4.185211 1.781150

1 4.820818 -4.019369 2.234429

6 -3.648099 -1.951701 0.356350

1 -2.881321 -2.672036 0.093110

6 -5.342203 -3.575954 -0.561884

1 -5.435925 -4.357610 0.201048

1 -4.572383 -3.899153 -1.269162

1 -6.295539 -3.520193 -1.093041

6 -4.302172 0.211599 1.236862

1 -4.042111 1.159590 1.695017

6 -6.726851 0.925350 1.290406

1 -7.242515 0.637625 2.213835

1 -7.481102 0.975942 0.499966

1 -6.318610 1.928350 1.438494

6 2.124908 -4.234249 0.250413

1 1.558385 -4.125568 -0.661532

6 2.824196 -1.250415 3.042179

1 3.605099 -1.328319 3.785246

6 -0.114065 1.736032 5.855208

1 -0.921684 1.505300 6.559742

1 0.592267 0.901404 5.880188

1 0.397421 2.628317 6.224941

1 -0.855176 4.078291 4.676677

6 -1.816019 4.841758 2.243779

1 -2.521278 4.832047 1.408554

1 -2.234542 5.464873 3.038859

1 -0.896541 5.328957 1.896752

6 3.138318 4.388311 1.796755

6 4.010134 4.203022 0.748491

6 3.873250 3.094260 -0.127561

6 2.816697 2.151403 0.091050

6 1.938696 2.372290 1.184605

6 2.092191 3.462849 2.013055

1 5.556691 3.634312 -1.372814

1 3.251722 5.240761 2.458688

1 4.817583 4.907352 0.570682

6 4.754171 2.916927 -1.227735

6 2.684616 1.051346 -0.823731

1 1.129012 1.681091 1.381401

1 1.403069 3.602611 2.838033

6 3.534670 0.946142 -1.907580

6 4.584079 1.873673 -2.103373

1 3.395665 0.155502 -2.632217

1 5.245337 1.754715 -2.955228

1 1.064396 -2.147429 4.084525

6 -0.293610 1.995918 -2.544895

6 0.378213 3.119455 -1.999092

6 0.251771 1.436418 -3.720415

6 1.482100 3.691829 -2.619139

1 0.014442 3.565108 -1.072332

6 1.362752 1.994180 -4.348028

1 -0.242937 0.574411 -4.157044

6 1.972024 3.127040 -3.801045

1 1.971080 4.557571 -2.184600

1 1.751941 1.557963 -5.263403

1 2.837079 3.565741 -4.288560

5 -2.198055 2.162264 -2.620010

8 -2.736472 1.257671 -3.548250

1 -2.913949 1.723368 -4.373197

8 -2.466251 3.509179 -2.910050

1 -2.031377 4.123947 -2.312916

8 -2.545622 1.728294 -1.213644

1 -3.394422 1.263484 -1.185746

----------------------------------------------------------------------------------------------------------------

**TS(C’-D’)**

----------------------------------------------------------------------------------------------------------------

Number of imaginary frequencies = 1

Electronic energy: HF = -3409.35519

Zero-point correction = 0.950351 (Hartree/Particle)

Thermal correction to Energy = 1.010850

Thermal correction to Enthalpy = 1.011794

Thermal correction to Gibbs Free Energy = 0.854816

Sum of electronic and zero-point Energies = -3408.404839

Sum of electronic and thermal Energies = -3408.344340

Sum of electronic and thermal Enthalpies = -3408.343396

Sum of electronic and thermal Free Energies = -3408.500374

......................................................................................................................................................

Cartesian Coordinates

......................................................................................................................................................

45 0.700267 0.203029 0.956129

26 -3.132546 -1.538175 -2.187446

15 -1.521035 0.301688 0.423185

15 1.308844 -0.609009 -1.149926

6 -1.207897 -1.886466 1.944039

6 0.173688 -1.609646 1.693164

6 4.861561 -3.508484 -0.687685

1 5.694591 -4.190285 -0.533796

6 -2.218586 -0.998121 1.478288

6 -0.593106 -3.960022 3.105331

1 -0.882476 -4.851582 3.653270

6 2.733289 -1.748323 -1.053356

6 -4.694957 -2.436733 -1.159448

1 -5.301501 -1.956043 -0.407219

6 1.801213 0.791671 -2.210756

6 -1.599220 -3.059623 2.667234

6 1.169048 1.086880 -3.426339

1 0.379509 0.453688 -3.804277

6 1.114313 -2.514776 2.143900

1 2.168082 -2.323490 1.982721

6 -2.979718 -3.266372 2.926772

1 -3.277655 -4.147187 3.488351

6 2.534518 3.055911 -3.666394

6 3.178624 2.790042 -2.452960

6 2.795188 1.657486 -1.729605

1 3.261310 1.465117 -0.772264

6 -3.934035 -2.377094 2.477992

1 -4.984520 -2.556472 2.682315

6 -1.883633 -0.625265 -3.536055

6 0.729683 -3.689855 2.840505

1 1.501848 -4.373559 3.182018

6 -1.226830 -0.799947 -2.277170

6 5.114171 -2.224489 -1.184660

6 -1.980609 -0.059707 -1.294859

6 3.564463 -3.940870 -0.393390

6 1.524685 2.222728 -4.161956

6 0.008865 -1.619450 -2.020825

1 -0.236902 -2.357738 -1.249068

6 0.518062 -2.364731 -3.261299

1 0.863793 -1.680827 -4.039181

1 -0.288330 -2.976039 -3.676005

1 1.347781 -3.022762 -3.003497

6 -3.555540 -1.242114 1.726589

1 -4.321821 -0.591179 1.322718

6 -3.904804 -3.165934 -3.200638

1 -3.795162 -3.316270 -4.265565

6 -3.109396 0.526156 -1.964177

1 -3.870117 1.128670 -1.490765

6 -2.994716 -3.603964 -2.191579

1 -2.078849 -4.154198 -2.357486

6 -4.957014 -2.447565 -2.560780

1 -5.784535 -1.960056 -3.056925

6 2.505526 -3.047969 -0.580959

1 1.502998 -3.372981 -0.329823

6 3.299296 -5.338696 0.108048

1 4.154843 -5.732130 0.663405

1 3.107503 -6.025348 -0.724995

1 2.422761 -5.363862 0.762093

6 4.038028 -1.349086 -1.364042

1 4.228555 -0.356218 -1.752520

6 6.516937 -1.800534 -1.544821

1 6.613307 -0.711608 -1.566091

1 6.796209 -2.174430 -2.536759

1 7.248115 -2.195352 -0.833421

6 -3.480626 -3.153543 -0.931296

1 -3.001384 -3.304498 0.023471

6 -3.039083 0.185558 -3.339288

1 -3.764767 0.448495 -4.095775

6 0.799683 2.559793 -5.441314

1 1.443782 3.107179 -6.134382

1 0.441556 1.658881 -5.946811

1 -0.075031 3.189490 -5.237824

1 2.820065 3.937655 -4.234993

6 4.262768 3.695091 -1.923609

1 5.255735 3.266134 -2.102183

1 4.237247 4.675016 -2.406372

1 4.158254 3.842438 -0.844133

6 -1.011958 5.417261 -1.317100

6 -2.003212 5.496620 -0.366788

6 -2.478249 4.333445 0.297112

6 -1.915875 3.055227 -0.031442

6 -0.915229 3.008571 -1.043411

6 -0.468189 4.157905 -1.661638

1 -3.916282 5.390902 1.517910

1 -0.653170 6.314381 -1.810603

1 -2.438767 6.456020 -0.103498

6 -3.494006 4.417714 1.285598

6 -2.369259 1.899390 0.690914

1 -0.500725 2.059580 -1.356056

1 0.303972 4.083525 -2.419440

6 -3.352119 2.034618 1.654447

6 -3.930098 3.291421 1.941581

1 -3.651823 1.179726 2.244893

1 -4.703729 3.360119 2.699132

1 -1.586524 -1.080217 -4.469471

6 0.435303 1.049339 3.038116

6 -0.709301 1.783187 3.413991

6 0.971865 0.194153 4.026680

6 -1.295902 1.671568 4.670810

1 -1.138665 2.491789 2.716209

6 0.398330 0.065706 5.289450

1 1.845098 -0.407683 3.800733

6 -0.747531 0.796674 5.611494

1 -2.171627 2.264815 4.917871

1 0.837731 -0.606952 6.019761

1 -1.201320 0.694746 6.592650

5 1.702176 2.426622 2.159061

8 1.519216 3.625622 2.811125

1 0.606187 3.923304 2.844734

8 1.419576 2.299743 0.749910

1 0.785124 2.938108 0.391585

6 3.478493 0.754216 2.050554

8 2.774709 -0.096689 1.471166

8 3.044450 1.910290 2.452522

6 4.915205 0.458673 2.358856

1 5.534444 1.330076 2.135799

1 5.009942 0.256526 3.431158

1 5.245253 -0.411958 1.793256

----------------------------------------------------------------------------------------------------------------

**TS(C’’-D’’)**

----------------------------------------------------------------------------------------------------------------

Number of imaginary frequencies = 1

Electronic energy: HF = -3409.3345938

Zero-point correction = 0.949744 (Hartree/Particle)

Thermal correction to Energy = 1.010417

Thermal correction to Enthalpy = 1.011362

Thermal correction to Gibbs Free Energy = 0.854468

Sum of electronic and zero-point Energies = -3408.384849

Sum of electronic and thermal Energies = -3408.324176

Sum of electronic and thermal Enthalpies = -3408.323232

Sum of electronic and thermal Free Energies = -3408.480126

......................................................................................................................................................

Cartesian Coordinates

......................................................................................................................................................

45 -0.859659 -0.333407 -0.424001

26 4.049750 -0.211302 1.136572

15 1.235829 0.154191 -1.010255

15 -0.498014 -0.058358 1.819964

6 1.043179 -2.508755 -1.230958

6 -0.159966 -2.248111 -0.506150

6 -3.557361 -3.357566 2.732428

1 -4.274099 -4.162562 2.874577

6 1.839776 -1.421826 -1.676597

6 0.672311 -4.921852 -1.045318

1 0.978282 -5.941648 -1.258033

6 -1.708889 -1.299526 2.375405

6 5.297953 -1.393797 -0.023690

1 5.454403 -1.273456 -1.084632

6 -0.980997 1.579826 2.466358

6 1.461756 -3.844538 -1.525655

6 -2.334342 1.904838 2.627292

1 -3.104787 1.158960 2.486666

6 -0.894394 -3.330642 -0.064036

1 -1.827146 -3.187383 0.465710

6 2.640292 -4.024565 -2.296839

1 2.956697 -5.035357 -2.538175

6 -1.737130 4.167917 3.183429

6 -0.376597 3.864691 3.056735

6 -0.008923 2.570843 2.676140

1 1.041044 2.351761 2.538915

6 3.380461 -2.945690 -2.737711

1 4.278575 -3.106584 -3.325099

6 3.224996 1.162551 2.415246

6 -0.472018 -4.660938 -0.327737

1 -1.082888 -5.482495 0.035479

6 2.205741 0.393513 1.765848

6 -3.925152 -2.243596 1.966823

6 2.331980 0.643612 0.344860

6 -2.288232 -3.469439 3.308991

6 -2.726229 3.202751 2.972416

6 1.181463 -0.470748 2.472567

1 1.309186 -1.508978 2.145019

6 1.297991 -0.384021 4.000765

1 1.176843 0.644420 4.346132

1 2.281214 -0.743032 4.318197

1 0.540074 -0.988142 4.499772

6 2.992027 -1.626321 -2.411443

1 3.610614 -0.791758 -2.721419

6 5.498643 -1.160873 2.262886

1 5.821361 -0.818015 3.236010

6 3.451267 1.522613 0.154043

1 3.803851 1.879249 -0.802191

6 4.415645 -2.054025 2.002203

1 3.779163 -2.514241 2.745701

6 6.044900 -0.756147 1.009605

1 6.854535 -0.053827 0.868784

6 -1.363198 -2.434522 3.112671

1 -0.366815 -2.548965 3.521836

6 -1.912882 -4.675517 4.131973

1 -2.000836 -4.459540 5.203097

1 -0.878549 -4.978073 3.943426

1 -2.563295 -5.525782 3.913391

6 -2.991115 -1.219809 1.792827

1 -3.279326 -0.368431 1.185403

6 -5.280801 -2.157413 1.310847

1 -6.079503 -2.408501 2.015210

1 -5.353739 -2.864794 0.476000

1 -5.465539 -1.152860 0.923040

6 4.290762 -2.198366 0.590959

1 3.548276 -2.789616 0.078496

6 3.988042 1.845735 1.425274

1 4.857374 2.460915 1.608867

6 -4.191375 3.530635 3.115132

1 -4.365497 4.608030 3.061238

1 -4.776587 3.045853 2.327936

1 -4.579761 3.179872 4.078370

1 -2.032320 5.179157 3.451832

6 0.682433 4.903162 3.335248

1 1.581319 4.724684 2.738477

1 0.320908 5.911792 3.117068

1 0.976973 4.885370 4.391122

6 0.557287 5.558737 -1.402999

6 0.964228 5.178193 -2.660105

6 1.230806 3.816000 -2.956062

6 1.103237 2.830889 -1.922937

6 0.672105 3.258915 -0.643852

6 0.399983 4.584476 -0.391717

1 1.680518 4.175302 -5.037539

1 0.344617 6.600954 -1.187969

1 1.074350 5.912408 -3.452688

6 1.591269 3.414638 -4.267212

6 1.379242 1.461494 -2.254658

1 0.511030 2.535957 0.141841

1 0.042042 4.874796 0.589110

6 1.692016 1.112022 -3.560481

6 1.805799 2.090165 -4.568957

1 1.857148 0.074970 -3.820905

1 2.067174 1.787991 -5.577668

1 3.416721 1.181874 3.477351

6 -1.929621 -0.738506 -2.326576

6 -2.996144 -1.601396 -1.977593

6 -1.203264 -1.063414 -3.486726

6 -3.312297 -2.724728 -2.735634

1 -3.590943 -1.392487 -1.090623

6 -1.501578 -2.190674 -4.251276

1 -0.394914 -0.408483 -3.794431

6 -2.553454 -3.027097 -3.870951

1 -4.139214 -3.367306 -2.446927

1 -0.919542 -2.420325 -5.139056

1 -2.787853 -3.908009 -4.460935

5 -2.321404 1.252269 -2.077477

8 -1.895380 1.557049 -0.736231

1 -2.696123 1.596029 -0.166360

6 -4.675529 1.126335 -1.309187

8 -4.396751 1.140169 -0.104239

8 -3.781992 1.251081 -2.274506

6 -6.075986 0.933932 -1.816715

1 -6.297847 1.660995 -2.601252

1 -6.146886 -0.061901 -2.268031

1 -6.790877 1.019350 -0.999431

8 -1.616275 1.906731 -3.069451

1 -1.995986 1.745562 -3.939578

----------------------------------------------------------------------------------------------------------------

**TS(E-FS)**

----------------------------------------------------------------------------------------------------------------

Number of imaginary frequencies = 1

Electronic energy: HF = -3693.0312698

Zero-point correction = 1.043928 (Hartree/Particle)

Thermal correction to Energy = 1.108238

Thermal correction to Enthalpy = 1.109183

Thermal correction to Gibbs Free Energy = 0.943734

Sum of electronic and zero-point Energies = -3691.987342

Sum of electronic and thermal Energies = -3691.923031

Sum of electronic and thermal Enthalpies = -3691.922087

Sum of electronic and thermal Free Energies = -3692.087535

......................................................................................................................................................

Cartesian Coordinates

......................................................................................................................................................

45 0.516658 0.372269 -0.364254

26 -4.499692 -1.262061 0.489151

15 -1.130241 -1.146068 -0.849573

15 -0.868850 1.716125 0.912987

6 -1.236930 0.761347 -2.772197

6 -0.186093 1.333209 -1.992702

6 0.103071 5.987657 -0.426364

1 0.376187 6.973692 -0.794225

6 -1.827262 -0.475054 -2.388899

6 -1.121693 2.658676 -4.326459

1 -1.476637 3.165567 -5.218874

6 -0.585170 3.458825 0.499768

6 -5.496289 -2.083593 -1.134231

1 -5.069426 -2.790253 -1.831003

6 -0.619190 1.531847 2.706587

6 -1.714373 1.424770 -3.949680

6 -0.664932 2.626516 3.582680

1 -0.777853 3.631409 3.191441

6 0.356689 2.537773 -2.395720

1 1.137246 3.000636 -1.803507

6 -2.756229 0.813457 -4.694549

1 -3.117492 1.311303 -5.590123

6 -0.446180 1.126480 5.453203

6 -0.405921 0.020245 4.600492

6 -0.493438 0.238371 3.222979

1 -0.467896 -0.608033 2.551950

6 -3.303495 -0.391652 -4.304684

1 -4.096158 -0.846085 -4.890306

6 -3.669187 -0.522581 2.231274

6 -0.108367 3.193878 -3.563873

1 0.342096 4.140845 -3.846648

6 -2.942338 -0.058677 1.094212

6 0.953648 5.340943 0.480282

6 -2.425091 -1.221725 0.409927

6 -1.077554 5.396275 -0.884586

6 -0.573268 2.433901 4.963949

6 -2.699029 1.374599 0.704134

1 -2.881628 1.484960 -0.370433

6 -3.571026 2.356674 1.493731

1 -3.340205 2.312017 2.560687

1 -4.625638 2.102374 1.359519

1 -3.417620 3.383881 1.162577

6 -2.840347 -1.041103 -3.138415

1 -3.283745 -1.981062 -2.833938

6 -6.557003 -1.209551 0.717703

1 -7.052041 -1.128650 1.675295

6 -2.884128 -2.382884 1.118808

1 -2.685600 -3.405622 0.838427

6 -6.130577 -0.121813 -0.101169

1 -6.258335 0.927948 0.122021

6 -6.168631 -2.421828 0.075426

1 -6.318313 -3.420701 0.460667

6 -1.411153 4.122735 -0.412943

1 -2.298515 3.639106 -0.807214

6 -1.958912 6.079183 -1.900010

1 -2.975389 6.219073 -1.516781

1 -2.033874 5.474224 -2.810557

1 -1.566106 7.060718 -2.175517

6 0.601813 4.067594 0.934303

1 1.267864 3.536462 1.604901

6 2.218940 6.004059 0.964613

1 2.619363 6.693068 0.215992

1 2.989394 5.263493 1.196733

1 2.034300 6.584396 1.876501

6 -5.471374 -0.658426 -1.243524

1 -5.009467 -0.088564 -2.035312

6 -3.635185 -1.946718 2.242898

1 -4.147266 -2.585991 2.948203

6 -0.602491 3.607513 5.911802

1 -1.287755 3.428217 6.746091

1 0.389312 3.789381 6.341492

1 -0.916992 4.522931 5.404366

1 -0.381732 0.969540 6.527517

6 -0.246369 -1.381837 5.134687

1 -0.586276 -1.459537 6.170623

1 -0.813453 -2.099462 4.533818

1 0.806561 -1.690007 5.111890

6 1.134288 -5.307676 1.884601

6 0.970008 -5.799058 0.610550

6 0.385890 -5.003501 -0.411247

6 -0.051915 -3.672575 -0.104941

6 0.143307 -3.198523 1.218843

6 0.719934 -3.989979 2.186195

1 0.587790 -6.507429 -1.951494

1 1.582551 -5.924998 2.656370

1 1.290208 -6.806726 0.362135

6 0.254955 -5.496183 -1.735839

6 -0.624394 -2.877643 -1.156102

1 -0.143659 -2.188820 1.467908

1 0.851874 -3.597272 3.189314

6 -0.697063 -3.390689 -2.438825

6 -0.264234 -4.703401 -2.729930

1 -1.078533 -2.779669 -3.246052

1 -0.344928 -5.075336 -3.746017

1 -4.203794 0.099004 2.933575

6 2.197340 -0.696811 -1.494979

6 2.365674 -0.230200 -2.813620

6 2.439346 -2.060961 -1.234666

6 2.676699 -1.106042 -3.847644

1 2.236157 0.824120 -3.027709

6 2.780830 -2.937126 -2.261609

1 2.338787 -2.451841 -0.230036

6 2.889548 -2.462173 -3.569981

1 2.772492 -0.736222 -4.864089

1 2.946177 -3.986842 -2.043756

1 3.153364 -3.143385 -4.373516

6 5.309737 -0.857416 0.857007

6 4.041290 -1.049327 1.465313

6 3.855944 -1.996025 2.487598

6 4.917906 -2.768745 2.926933

6 6.172317 -2.600129 2.328044

6 6.362487 -1.666616 1.313721

1 2.862107 -2.108537 2.903747

1 4.780162 -3.499677 3.716458

1 7.012325 -3.205377 2.654309

6 5.497634 0.154129 -0.204353

6 6.761259 0.424177 -0.755954

6 4.404877 0.923516 -0.665757

6 6.934232 1.415797 -1.716009

6 4.588631 1.938256 -1.610521

6 5.847635 2.184856 -2.142315

1 7.923511 1.597712 -2.123278

1 3.726217 2.520165 -1.913904

1 5.986880 2.969220 -2.878991

6 2.886367 -0.320255 0.975344

6 3.047253 0.683606 -0.138729

8 1.724320 -0.526428 1.379493

8 2.185235 1.655904 -0.141316

1 7.630997 -0.131190 -0.427689

1 7.348417 -1.577558 0.875844

----------------------------------------------------------------------------------------------------------------

**TS(E-FS)-1**

----------------------------------------------------------------------------------------------------------------

Number of imaginary frequencies = 1

Electronic energy: HF = -3693.028844

Zero-point correction = 1.044163 (Hartree/Particle)

Thermal correction to Energy = 1.108338

Thermal correction to Enthalpy = 1.109282

Thermal correction to Gibbs Free Energy = 0.943643

Sum of electronic and zero-point Energies = -3691.984681

Sum of electronic and thermal Energies = -3691.920506

Sum of electronic and thermal Enthalpies = -3691.919562

Sum of electronic and thermal Free Energies = -3692.085201

......................................................................................................................................................

Cartesian Coordinates

......................................................................................................................................................

45 0.358221 0.463654 -0.400994

26 -4.557932 -1.213835 0.347130

15 -1.172640 -1.170605 -0.813109

15 -0.818337 1.405409 1.348423

6 -1.584349 0.751685 -2.651367

6 -0.662934 1.463273 -1.818365

6 -0.747982 6.013396 1.343458

1 -0.734903 7.100532 1.321758

6 -1.904013 -0.609699 -2.377371

6 -1.859819 2.746399 -4.054750

1 -2.311686 3.237481 -4.911368

6 -0.768292 3.228470 1.393530

6 -5.586261 -1.565653 -1.419178

1 -5.279072 -2.258459 -2.187788

6 -0.052687 0.773264 2.872915

6 -2.181537 1.389246 -3.786370

6 -0.714489 -0.117324 3.725613

1 -1.751788 -0.373815 3.558205

6 -0.369357 2.776667 -2.128530

1 0.340032 3.325716 -1.519948

6 -3.053413 0.627280 -4.608581

1 -3.503127 1.105263 -5.474323

6 1.312900 -0.416572 4.989089

6 2.002295 0.460748 4.142335

6 1.306776 1.054300 3.088512

1 1.835686 1.704162 2.399619

6 -3.326115 -0.696519 -4.330570

1 -3.991827 -1.261593 -4.974873

6 -3.832619 -1.105744 2.268001

6 -0.973931 3.417304 -3.241681

1 -0.720280 4.452068 -3.454282

6 -2.965872 -0.417631 1.360608

6 0.012593 5.342523 2.306728

6 -2.495294 -1.389116 0.402911

6 -1.532585 5.323508 0.412722

6 -0.039509 -0.714701 4.797721

6 -2.651088 1.055641 1.378797

1 -2.956140 1.469801 0.411259

6 -3.389818 1.819960 2.485427

1 -3.070558 1.503371 3.480876

1 -4.465377 1.643232 2.397459

1 -3.211507 2.891972 2.399476

6 -2.757573 -1.321293 -3.197505

1 -3.013640 -2.348986 -2.965667

6 -6.554000 -0.692179 0.484410

1 -7.089936 -0.610660 1.419716

6 -3.107122 -2.648591 0.720772

1 -2.955290 -3.568280 0.175707

6 -5.817943 0.350171 -0.156040

1 -5.706598 1.363187 0.205611

6 -6.412817 -1.874770 -0.299337

1 -6.824185 -2.845767 -0.061521

6 -1.533122 3.927370 0.447641

1 -2.128184 3.390437 -0.280827

6 -2.374188 6.058233 -0.601132

1 -1.935503 7.026636 -0.856270

1 -3.382003 6.248775 -0.213299

1 -2.480485 5.475350 -1.520785

6 -0.009859 3.943375 2.327352

1 0.559098 3.420682 3.085874

6 0.860720 6.108873 3.291418

1 1.831535 6.367166 2.851993

1 1.054000 5.521655 4.193167

1 0.379353 7.044370 3.589772

6 -5.219063 -0.187804 -1.330886

1 -4.578454 0.343463 -2.018079

6 -3.918817 -2.472026 1.870427

1 -4.537383 -3.228090 2.332842

6 -0.773684 -1.650478 5.726616

1 -1.489788 -2.270623 5.178817

1 -0.083095 -2.312300 6.255919

1 -1.336417 -1.091867 6.483665

1 1.846361 -0.885648 5.812534

6 3.480488 0.706906 4.315980

1 3.769873 1.688609 3.930893

1 3.777809 0.649877 5.366573

1 4.061978 -0.044265 3.767489

6 1.388432 -4.801381 2.323588

6 1.377427 -5.392981 1.081230

6 0.750386 -4.757920 -0.023169

6 0.118296 -3.483174 0.161112

6 0.149565 -2.905629 1.458418

6 0.768776 -3.544352 2.509400

1 1.223298 -6.331114 -1.429333

1 1.869014 -5.297316 3.161142

1 1.848207 -6.359137 0.924307

6 0.747960 -5.361793 -1.309130

6 -0.485684 -2.850680 -0.981358

1 -0.296541 -1.937519 1.635155

1 0.787930 -3.064084 3.481825

6 -0.440833 -3.466134 -2.217649

6 0.163806 -4.733028 -2.381644

1 -0.844928 -2.964597 -3.087344

1 0.172128 -5.195153 -3.363364

1 -4.377541 -0.653577 3.083381

6 1.920300 -0.236842 -1.953706

6 1.901797 0.475904 -3.169361

6 2.247832 -1.606526 -1.987774

6 2.124113 -0.167106 -4.379798

1 1.700717 1.540587 -3.159133

6 2.496758 -2.252090 -3.198080

1 2.284326 -2.183066 -1.070537

6 2.428780 -1.535192 -4.393465

1 2.080603 0.391039 -5.310095

1 2.730986 -3.311374 -3.205722

1 2.626704 -2.034960 -5.337104

6 5.353003 -0.518728 -0.095049

6 4.190270 -0.931617 0.604861

6 4.197967 -2.055864 1.449997

6 5.362708 -2.785110 1.624477

6 6.519357 -2.393565 0.938009

6 6.513359 -1.287164 0.093838

1 3.271838 -2.337395 1.939193

1 5.376678 -3.653763 2.273991

1 7.436890 -2.960969 1.059063

6 5.324361 0.670770 -0.972857

6 6.480111 1.140881 -1.618520

6 4.129876 1.408136 -1.150696

6 6.456471 2.294287 -2.395796

6 4.119035 2.583945 -1.908036

6 5.275386 3.028335 -2.535993

1 7.366878 2.628701 -2.882609

1 3.188611 3.133818 -1.988132

1 5.262424 3.938341 -3.126735

6 2.938517 -0.228971 0.402740

6 2.873150 0.964538 -0.514221

8 1.864524 -0.600484 0.914918

8 1.959668 1.849225 -0.231720

1 7.419735 0.613935 -1.508429

1 7.429556 -1.029197 -0.421811

----------------------------------------------------------------------------------------------------------------

**TS(E-FS)-2**

----------------------------------------------------------------------------------------------------------------

Number of imaginary frequencies = 1

Electronic energy: HF = -3693.0216288

Zero-point correction = 1.043516 (Hartree/Particle)

Thermal correction to Energy = 1.107944

Thermal correction to Enthalpy = 1.108888

Thermal correction to Gibbs Free Energy = 0.941406

Sum of electronic and zero-point Energies = -3691.978113

Sum of electronic and thermal Energies = -3691.913685

Sum of electronic and thermal Enthalpies = -3691.912741

Sum of electronic and thermal Free Energies = -3692.080223

......................................................................................................................................................

Cartesian Coordinates

......................................................................................................................................................

45 -0.523329 0.204613 0.322377

26 4.544988 -0.663297 -1.136640

15 1.147575 -1.308202 -0.002360

15 0.827308 2.028721 -0.079546

6 1.228607 -0.628828 2.613559

6 0.150524 0.226165 2.223478

6 -0.333727 5.066494 3.145946

1 -0.651191 5.737923 3.940038

6 1.853962 -1.482509 1.661532

6 1.060780 0.199206 4.918004

1 1.403866 0.188658 5.948317

6 0.467251 3.335668 1.123899

6 5.549084 -2.180273 -0.135317

1 5.132755 -3.147272 0.106218

6 0.616870 2.731269 -1.744644

6 1.688367 -0.652693 3.970657

6 0.538131 1.848654 -2.827641

1 0.522137 0.780567 -2.654954

6 -0.426524 1.037443 3.180786

1 -1.224947 1.714651 2.898496

6 2.741588 -1.541618 4.310530

1 3.088378 -1.568045 5.339861

6 0.510693 3.712474 -4.344055

6 0.591453 4.618468 -3.277519

6 0.649572 4.114862 -1.975456

1 0.725879 4.803025 -1.140954

6 3.313739 -2.372237 3.367312

1 4.107680 -3.054913 3.652477

6 3.714880 0.860964 -2.255879

6 0.026989 1.019249 4.524944

1 -0.450128 1.674594 5.247853

6 2.956159 0.646014 -1.066671

6 -1.131913 4.942846 2.001076

6 2.458474 -0.711649 -1.107799

6 0.849950 4.340031 3.305267

6 0.484333 2.330567 -4.139006

6 2.661982 1.668736 -0.002455

1 2.820416 1.215437 0.981916

6 3.515489 2.933123 -0.148636

1 4.575236 2.665407 -0.136427

1 3.327345 3.638295 0.660892

1 3.300693 3.442319 -1.091227

6 2.869808 -2.341837 2.027200

1 3.308584 -3.007708 1.294516

6 6.601343 -0.479179 -1.282619

1 7.097313 0.079691 -2.063830

6 2.976025 -1.320497 -2.303074

1 2.826597 -2.346450 -2.600214

6 6.155053 0.042179 -0.031790

1 6.266805 1.062851 0.305739

6 6.230788 -1.854698 -1.342839

1 6.398308 -2.521494 -2.177073

6 1.240054 3.470305 2.282326

1 2.128347 2.864512 2.426332

6 1.677116 4.445436 4.561928

1 1.788286 3.462065 5.032070

1 1.217477 5.120018 5.288116

1 2.683880 4.819876 4.346773

6 -0.723613 4.065383 0.993505

1 -1.349064 3.927580 0.118896

6 -2.402195 5.742275 1.850679

1 -2.837893 5.984826 2.823671

1 -3.147417 5.193659 1.267822

1 -2.211563 6.689842 1.332786

6 5.500717 -1.004931 0.676932

1 5.027774 -0.918057 1.643106

6 3.729459 -0.345308 -3.010711

1 4.276155 -0.512182 -3.928139

6 0.376546 1.365704 -5.293875

1 -0.659879 1.032792 -5.429897

1 0.699356 1.823735 -6.232294

1 0.987003 0.473974 -5.120478

1 0.471854 4.097279 -5.360605

6 0.607729 6.105319 -3.533719

1 1.321479 6.365517 -4.321595

1 -0.377171 6.458065 -3.860657

1 0.877619 6.662734 -2.633233

6 -0.486971 -6.486643 1.327877

6 -0.546755 -6.417895 -0.043460

6 -0.212624 -5.221350 -0.731306

6 0.242146 -4.075381 0.010898

6 0.249942 -4.176400 1.428213

6 -0.103244 -5.344497 2.065095

1 -0.735802 -6.012641 -2.671998

1 -0.750883 -7.403995 1.844182

1 -0.869792 -7.275147 -0.627082

6 -0.386390 -5.134945 -2.135905

6 0.580213 -2.889231 -0.726485

1 0.493725 -3.314022 2.026103

1 -0.098975 -5.380610 3.149912

6 0.325311 -2.835577 -2.090465

6 -0.155798 -3.954481 -2.800594

1 0.493214 -1.913296 -2.634082

1 -0.327327 -3.876738 -3.869248

1 4.238184 1.769440 -2.512500

6 -2.255841 -1.272591 0.729763

6 -2.517152 -1.472309 2.100641

6 -2.495917 -2.344242 -0.155194

6 -2.938484 -2.706961 2.578197

1 -2.382479 -0.649089 2.792577

6 -2.952937 -3.573195 0.313606

1 -2.304483 -2.229911 -1.215861

6 -3.167505 -3.757172 1.680485

1 -3.106320 -2.852375 3.641103

1 -3.120165 -4.390501 -0.379468

1 -3.514025 -4.718131 2.047539

6 -5.230227 -0.226054 -1.620880

6 -3.922134 -0.121046 -2.162335

6 -3.663843 -0.413474 -3.513137

6 -4.690394 -0.815000 -4.351307

6 -5.983556 -0.938731 -3.827735

6 -6.246141 -0.652507 -2.491919

1 -2.644422 -0.318823 -3.870792

1 -4.497256 -1.036487 -5.395441

1 -6.797146 -1.261981 -4.469575

6 -5.496546 0.114893 -0.207483

6 -6.796278 0.093373 0.326724

6 -4.447121 0.535541 0.640737

6 -7.045792 0.483613 1.637981

6 -4.708067 0.957884 1.947953

6 -6.001460 0.929610 2.452939

1 -8.060916 0.453254 2.020380

1 -3.877217 1.304130 2.551244

1 -6.199314 1.252723 3.469707

6 -2.808523 0.227777 -1.300119

6 -3.050809 0.562106 0.153233

8 -1.619598 0.204547 -1.678132

8 -2.222259 1.420071 0.675647

1 -7.633867 -0.216712 -0.285524

1 -7.260864 -0.765564 -2.132552

----------------------------------------------------------------------------------------------------------------

**TS(E-FR)**

----------------------------------------------------------------------------------------------------------------

Number of imaginary frequencies = 1

Electronic energy: HF = -3693.0169342

Zero-point correction = 1.043055 (Hartree/Particle)

Thermal correction to Energy = 1.107789

Thermal correction to Enthalpy = 1.108733

Thermal correction to Gibbs Free Energy = 0.940797

Sum of electronic and zero-point Energies = -3691.973879

Sum of electronic and thermal Energies = -3691.909145

Sum of electronic and thermal Enthalpies = -3691.908201

Sum of electronic and thermal Free Energies = -3692.076138

......................................................................................................................................................

Cartesian Coordinates

......................................................................................................................................................

45 0.458701 0.396213 -0.206511

26 -4.473172 -1.573148 0.231161

15 -1.014914 -1.249319 -0.796834

15 -1.164355 1.741876 0.749506

6 -0.982178 0.530139 -2.821089

6 -0.043648 1.189665 -1.977148

6 -1.572212 -0.706091 -2.435936

6 -0.712815 2.332484 -4.466910

1 -0.969297 2.775528 -5.424581

6 -5.217617 -2.568640 -1.428681

1 -4.657342 -3.265229 -2.035602

6 -1.328242 1.111235 -4.084518

6 0.550710 2.364247 -2.381489

1 1.285025 2.852448 -1.753852

6 -2.261558 0.424497 -4.904145

1 -2.529306 0.858799 -5.863268

6 -2.816312 -0.776043 -4.510009

1 -3.521707 -1.288420 -5.156148

6 -3.888084 -0.660076 1.991294

6 0.208571 2.930585 -3.637173

1 0.687637 3.858931 -3.932033

6 -3.094558 -0.198382 0.898636

6 -2.416399 -1.347800 0.341880

6 -2.935570 1.227039 0.443504

1 -3.046642 1.262353 -0.645981

6 -2.470846 -1.348950 -3.265042

1 -2.914778 -2.289454 -2.963308

6 -2.838853 -2.501933 1.085838

1 -2.526996 -3.516947 0.894946

6 -5.978028 -2.908559 -0.272846

1 -6.075191 -3.896438 0.155150

6 -5.311464 -1.154998 -1.620406

1 -4.824639 -0.583718 -2.396286

6 -3.732506 -2.071769 2.102291

1 -4.254041 -2.713006 2.798790

6 1.361373 -4.860958 2.505051

6 1.272075 -5.527187 1.304761

6 0.696337 -4.907172 0.163290

6 0.175923 -3.577576 0.274170

6 0.283779 -2.924804 1.530731

6 0.868635 -3.539662 2.613752

1 1.068136 -6.572976 -1.164246

1 1.814321 -5.341563 3.365985

1 1.656157 -6.538334 1.206031

6 0.672490 -5.563812 -1.095085

6 -0.370915 -2.953357 -0.897866

1 -0.068917 -1.906643 1.629490

1 0.964057 -3.001593 3.550563

6 -0.331311 -3.614620 -2.110906

6 0.186157 -4.926343 -2.210390

1 -0.693663 -3.125935 -3.006391

1 0.193613 -5.422319 -3.175354

6 2.311192 -0.667919 -0.970840

6 2.486188 -0.510552 -2.360048

6 2.690464 -1.887727 -0.386699

6 2.949975 -1.563670 -3.144725

1 2.268977 0.442136 -2.827075

6 3.171138 -2.936257 -1.163865

1 2.621833 -2.019391 0.685895

6 3.294101 -2.778335 -2.546586

1 3.067645 -1.427501 -4.215417

1 3.446631 -3.873602 -0.692525

1 3.677939 -3.593114 -3.152937

1 -4.541054 -0.050189 2.597289

6 3.144296 -0.506335 3.689175

6 2.700502 0.189085 2.569106

6 3.493789 0.264423 1.418227

6 4.766440 -0.349716 1.375486

6 5.199928 -1.030301 2.523169

6 4.399522 -1.117948 3.660716

6 2.955864 0.974889 0.231430

6 5.583564 -0.270146 0.147324

6 5.207158 0.597166 -0.905126

6 3.962737 1.395487 -0.831543

6 5.998121 0.717894 -2.052811

1 5.672616 1.406546 -2.824773

6 7.155861 -0.036629 -2.193146

6 7.525816 -0.916277 -1.171670

6 6.752994 -1.027994 -0.019461

1 2.528039 -0.549446 4.581278

1 1.743691 0.697276 2.579032

1 4.766573 -1.652485 4.531208

1 7.762792 0.050723 -3.088239

1 8.422788 -1.519259 -1.272472

8 3.711610 2.330218 -1.576664

8 1.916193 1.739618 0.399394

6 -0.978305 3.447044 0.165826

6 -1.800069 3.940021 -0.855977

6 0.153897 4.173486 0.560471

6 -1.510578 5.156148 -1.479043

1 -2.648378 3.364933 -1.211272

6 0.463167 5.392241 -0.051101

1 0.825077 3.769384 1.308829

6 -0.380885 5.867994 -1.060651

1 -0.143281 6.811608 -1.545213

6 -2.367977 5.647516 -2.618061

1 -2.182281 5.049371 -3.517930

1 -3.433789 5.563218 -2.384016

1 -2.154829 6.691577 -2.859182

6 1.710584 6.140688 0.346604

1 2.603656 5.575223 0.057518

1 1.760584 7.120499 -0.134042

1 1.757385 6.290362 1.430054

6 -3.934287 2.179016 1.110641

1 -3.780732 2.207218 2.192316

1 -3.830286 3.196188 0.732257

1 -4.955192 1.838988 0.917434

6 -0.990673 1.712437 2.562250

6 -0.993097 2.871464 3.344819

6 -0.883214 0.457538 3.181917

6 -0.869049 2.788345 4.737906

1 -1.092262 3.843651 2.875182

6 -0.774914 0.348323 4.569196

1 -0.915099 -0.444543 2.583881

6 -0.762774 1.524750 5.328956

1 -0.678664 1.454483 6.410920

6 -0.668186 -1.005392 5.227433

1 -1.295201 -1.063355 6.121929

1 -0.975242 -1.802363 4.545120

1 0.361046 -1.213204 5.544192

6 -0.833048 4.040027 5.578798

1 0.199765 4.373028 5.735705

1 -1.371625 4.860286 5.096946

1 -1.274948 3.871855 6.564541

6 -6.539571 -1.708608 0.254092

6 -6.131296 -0.627338 -0.582384

1 -7.136887 -1.627794 1.151442

1 -6.375804 0.415279 -0.435550

1 6.181038 -1.489297 2.542893

1 7.064710 -1.724497 0.749619

----------------------------------------------------------------------------------------------------------------

**TS(E-FR)-1**

---------------------------------------------------------------------------------------------------------------- Number of imaginary frequencies = 1

Electronic energy: HF = -3693.014838

Zero-point correction = 1.043842 (Hartree/Particle)

Thermal correction to Energy = 1.108314

Thermal correction to Enthalpy = 1.109258

Thermal correction to Gibbs Free Energy = 0.942447

Sum of electronic and zero-point Energies = -3691.970996

Sum of electronic and thermal Energies = -3691.906524

Sum of electronic and thermal Enthalpies = -3691.905580

Sum of electronic and thermal Free Energies = -3692.072391 ......................................................................................................................................................

Cartesian Coordinates

......................................................................................................................................................

45 0.383789 0.317275 -0.296547

26 -4.552255 -1.463690 0.141604

15 -1.008902 -1.488131 -0.351840

15 -1.186373 1.772439 0.588630

6 -0.972466 -0.520370 -2.835926

6 -0.240225 0.520427 -2.189137

6 -1.390743 -1.670701 -2.112087

6 -0.833807 0.727022 -4.943968

1 -1.052897 0.807051 -6.004424

6 -5.194228 -2.633645 -1.446041

1 -4.713407 -3.538704 -1.785553

6 -1.269116 -0.423253 -4.233053

6 0.178364 1.616956 -2.909560

1 0.771095 2.389606 -2.438738

6 -1.964061 -1.499484 -4.845206

1 -2.190168 -1.436675 -5.905849

6 -2.342361 -2.613471 -4.122940

1 -2.868811 -3.425668 -4.613439

6 -4.233947 -0.490446 1.923034

6 -0.126187 1.713352 -4.294442

1 0.223599 2.583686 -4.841215

6 -3.231216 -0.133489 0.966097

6 -2.537860 -1.346918 0.604636

6 -2.972770 1.248170 0.425693

1 -3.075392 1.207120 -0.664778

6 -2.063776 -2.700106 -2.739964

1 -2.404601 -3.560714 -2.176123

6 -3.145705 -2.429554 1.326456

1 -2.849581 -3.465746 1.257351

6 -6.211743 -2.554703 -0.450454

1 -6.619558 -3.384971 0.108902

6 -4.912451 -1.307148 -1.896089

1 -4.172975 -1.030492 -2.631959

6 -4.180160 -1.898590 2.138467

1 -4.847187 -2.468394 2.769742

6 1.420895 -2.870527 4.252213

6 1.510670 -4.015647 3.493870

6 0.934692 -4.081895 2.197139

6 0.245311 -2.938988 1.678563

6 0.143013 -1.786489 2.504178

6 0.725227 -1.745990 3.751510

1 1.566491 -6.112648 1.804045

1 1.875432 -2.830719 5.236840

1 2.033554 -4.888569 3.873835

6 1.056498 -5.246378 1.392424

6 -0.256054 -2.995478 0.333762

1 -0.397963 -0.914457 2.158571

1 0.640951 -0.843386 4.347557

6 -0.078288 -4.132568 -0.428082

6 0.562594 -5.272293 0.110400

1 -0.403815 -4.152167 -1.460142

1 0.676272 -6.158789 -0.504746

6 2.228400 -0.888470 -0.908822

6 2.322254 -1.126923 -2.294473

6 2.660871 -1.899641 -0.029714

6 2.776449 -2.351137 -2.780488

1 2.045145 -0.349168 -2.995861

6 3.137100 -3.112955 -0.510308

1 2.648385 -1.727412 1.039939

6 3.192003 -3.341886 -1.888818

1 2.835503 -2.517673 -3.851567

1 3.462190 -3.878749 0.185011

1 3.575912 -4.284880 -2.266415

1 -4.948626 0.186289 2.367501

6 4.048054 0.125105 3.261859

6 3.286995 0.565397 2.184318

6 3.805081 0.542382 0.885527

6 5.109043 0.052530 0.641943

6 5.867261 -0.364565 1.746104

6 5.346935 -0.335210 3.038041

6 2.933271 0.972517 -0.239491

6 5.626785 -0.024763 -0.738380

6 4.926951 0.600064 -1.795234

6 3.636738 1.283183 -1.557189

6 5.432382 0.584689 -3.100438

1 4.865663 1.094301 -3.871975

6 6.617048 -0.079605 -3.387998

6 7.303701 -0.728924 -2.357051

6 6.817924 -0.698009 -1.053582

1 3.633078 0.145668 4.264273

1 2.277215 0.921587 2.334588

1 5.959942 -0.669411 3.869055

1 7.002528 -0.101116 -4.401990

1 8.225155 -1.261774 -2.569971

8 3.122551 2.042526 -2.363397

8 1.878742 1.689048 0.049562

6 -1.214610 3.442033 -0.144044

6 -1.695308 3.558017 -1.457292

6 -0.808725 4.590157 0.544488

6 -1.751697 4.799490 -2.093968

1 -2.019246 2.679735 -2.002015

6 -0.849187 5.844098 -0.076253

1 -0.467837 4.523611 1.570007

6 -1.316607 5.928898 -1.391572

1 -1.347819 6.899808 -1.880116

6 -2.283539 4.909765 -3.501287

1 -2.118028 3.983197 -4.058449

1 -3.362068 5.107833 -3.500625

1 -1.803103 5.727824 -4.044740

6 -0.371836 7.074883 0.653827

1 0.673387 7.293495 0.405296

1 -0.962025 7.954421 0.382070

1 -0.431966 6.944762 1.737752

6 -3.950078 2.301910 0.962327

1 -3.838848 2.445343 2.039675

1 -3.787257 3.263213 0.474432

1 -4.977479 1.985269 0.762006

6 -0.759747 1.920571 2.357185

6 -1.544102 1.323615 3.354794

6 0.454483 2.532231 2.708126

6 -1.137295 1.344662 4.692507

1 -2.463642 0.814925 3.100877

6 0.870737 2.581794 4.044137

1 1.096344 2.939421 1.935319

6 0.067742 1.979083 5.018469

1 0.390722 1.999802 6.056529

6 2.163432 3.267949 4.409179

1 2.453755 3.050081 5.439910

1 2.977996 2.953838 3.749515

1 2.068770 4.355388 4.313720

6 -1.993134 0.707086 5.758616

1 -2.683694 1.437889 6.195614

1 -2.593058 -0.110175 5.348834

1 -1.383712 0.308505 6.574316

6 -6.556629 -1.181910 -0.280159

6 -5.754554 -0.412346 -1.175977

1 -7.270201 -0.790290 0.431228

1 -5.761243 0.664985 -1.268446

1 6.884343 -0.709500 1.604165

1 7.371518 -1.216405 -0.280012

----------------------------------------------------------------------------------------------------------------

**TS(E-FR)-2**

----------------------------------------------------------------------------------------------------------------

Number of imaginary frequencies = 1

Electronic energy: HF = -3693.0150548

Zero-point correction = 1.043931 (Hartree/Particle)

Thermal correction to Energy = 1.108330

Thermal correction to Enthalpy = 1.109275

Thermal correction to Gibbs Free Energy = 0.943510

Sum of electronic and zero-point Energies = -3691.970983

Sum of electronic and thermal Energies = -3691.906584

Sum of electronic and thermal Enthalpies = -3691.905639

Sum of electronic and thermal Free Energies = -3692.071404

......................................................................................................................................................

Cartesian Coordinates

......................................................................................................................................................

45 0.382956 0.321514 -0.294909

26 -4.555159 -1.453950 0.125810

15 -1.011447 -1.482576 -0.358270

15 -1.184702 1.772163 0.602845

6 -0.974912 -0.503383 -2.837711

6 -0.243446 0.534730 -2.185700

6 -1.392182 -1.657649 -2.119629

6 -0.837634 0.754861 -4.939425

1 -1.056953 0.840067 -5.999428

6 -5.195567 -2.611887 -1.471376

1 -4.716033 -3.515816 -1.815606

6 -1.271731 -0.399432 -4.234310

6 0.173975 1.635270 -2.900650

1 0.766433 2.405829 -2.426126

6 -1.965659 -1.473175 -4.851941

1 -2.191812 -1.405205 -5.912253

6 -2.343087 -2.591031 -4.135247

1 -2.868982 -3.401142 -4.629772

6 -4.240937 -0.493248 1.914290

6 -0.130980 1.738575 -4.284968

1 0.217989 2.611998 -4.827331

6 -3.234440 -0.131685 0.962980

6 -2.541751 -1.343920 0.596265

6 -2.972045 1.253528 0.433506

1 -3.073657 1.221784 -0.657402

6 -2.064598 -2.684288 -2.752699

1 -2.405417 -3.547728 -2.193239

6 -3.153890 -2.430159 1.309027

1 -2.859381 -3.466420 1.234094

6 -6.215586 -2.537074 -0.478044

1 -6.626933 -3.370018 0.074703

6 -4.909319 -1.283135 -1.911827

1 -4.167226 -1.003351 -2.643863

6 -4.190238 -1.902715 2.120833

1 -4.860045 -2.475337 2.746566

6 1.420067 -2.889560 4.239093

6 1.502482 -4.033147 3.477631

6 0.925339 -4.092498 2.181066

6 0.240581 -2.944921 1.666637

6 0.145214 -1.794305 2.495534

6 0.730399 -1.759740 3.741847

1 1.549020 -6.124370 1.780527

1 1.876646 -2.854503 5.222951

1 2.021251 -4.909840 3.854518

6 1.042524 -5.254544 1.372129

6 -0.261600 -2.994353 0.321819

1 -0.390848 -0.918428 2.152331

1 0.656569 -0.856546 4.338337

6 -0.087699 -4.129223 -0.444202

6 0.548890 -5.273433 0.089931

1 -0.412959 -4.143852 -1.476378

1 0.659326 -6.157900 -0.528721

6 2.224911 -0.883709 -0.915152

6 2.315775 -1.117584 -2.301762

6 2.656337 -1.898965 -0.040235

6 2.766047 -2.341267 -2.792755

1 2.039081 -0.336795 -2.999972

6 3.128226 -3.112003 -0.525782

1 2.646356 -1.730195 1.030023

6 3.180227 -3.336275 -1.905186

1 2.822898 -2.504266 -3.864496

1 3.452169 -3.881189 0.166352

1 3.560772 -4.279062 -2.286685

1 -4.956033 0.181788 2.360649

6 4.064745 0.110550 3.252719

6 3.298824 0.555843 2.180710

6 3.810445 0.537432 0.879301

6 5.112684 0.047208 0.627347

6 5.875825 -0.375291 1.726034

6 5.361933 -0.350470 3.020642

6 2.933742 0.973387 -0.239663

6 5.623811 -0.024453 -0.755716

6 4.920204 0.606956 -1.806104

6 3.632030 1.290598 -1.558609

6 5.419612 0.597462 -3.113676

1 4.850290 1.112040 -3.879986

6 6.601699 -0.067541 -3.410098

6 7.291836 -0.723508 -2.385699

6 6.812182 -0.698335 -1.079835

1 3.654951 0.127921 4.257334

1 2.290177 0.912410 2.337215

1 5.978688 -0.688604 3.847281

1 6.982477 -0.084530 -4.425951

1 8.211250 -1.257029 -2.605638

8 3.115526 2.055104 -2.358407

8 1.880510 1.688598 0.057572

6 -1.208238 3.450172 -0.109835

6 -1.682271 3.582188 -1.423998

6 -0.807335 4.589792 0.595474

6 -1.736351 4.831509 -2.045243

1 -2.002857 2.710434 -1.981041

6 -0.845737 5.851466 -0.009615

1 -0.472043 4.510529 1.621970

6 -1.306077 5.952376 -1.326261

1 -1.335600 6.929361 -1.802656

6 -2.260885 4.959478 -3.453814

1 -1.771080 5.778542 -3.987356

1 -2.100747 4.036895 -4.019061

1 -3.337654 5.166850 -3.456048

6 -0.373666 7.073349 0.738624

1 0.673403 7.294687 0.500480

1 -0.961725 7.956180 0.473045

1 -0.441836 6.930283 1.820445

6 -3.947075 2.305152 0.978344

1 -3.836260 2.438810 2.057035

1 -3.781385 3.270281 0.499074

1 -4.975145 1.992994 0.774362

6 -0.756167 1.896336 2.372642

6 0.459406 2.502846 2.729815

6 -1.539599 1.287573 3.363083

6 0.876082 2.536787 4.065578

1 1.098038 2.924043 1.961882

6 -1.126762 1.283875 4.699627

1 -2.463022 0.788084 3.104756

6 0.074867 1.919429 5.033109

1 0.396519 1.931438 6.071636

6 -1.945174 0.567053 5.744369

1 -1.767663 0.974305 6.742876

1 -3.015344 0.637454 5.530715

1 -1.688474 -0.499055 5.770071

6 2.163613 3.227375 4.440278

1 2.974056 2.949072 3.759930

1 2.052840 4.316224 4.386537

1 2.469619 2.976135 5.458849

6 -6.557612 -1.164611 -0.299585

6 -5.751221 -0.391070 -1.188090

1 -7.272153 -0.775985 0.412474

1 -5.755015 0.686882 -1.273352

1 6.891828 -0.720708 1.577651

1 7.368322 -1.221710 -0.311455

----------------------------------------------------------------------------------------------------------------

**TS(E-FR)-3**

----------------------------------------------------------------------------------------------------------------

Number of imaginary frequencies = 1

Electronic energy: HF = -3693.0075587

Zero-point correction = 1.042766 (Hartree/Particle)

Thermal correction to Energy = 1.107499

Thermal correction to Enthalpy = 1.108443

Thermal correction to Gibbs Free Energy = 0.939753

Sum of electronic and zero-point Energies = -3691.964690

Sum of electronic and thermal Energies = -3691.899957

Sum of electronic and thermal Enthalpies = -3691.899013

Sum of electronic and thermal Free Energies = -3692.067703

......................................................................................................................................................

Cartesian Coordinates

......................................................................................................................................................

45 0.422457 -0.334345 0.200109

26 -4.593319 1.060915 -0.994031

15 -1.075961 1.374326 -0.080109

15 -1.166663 -1.979154 0.042255

6 -1.017422 0.826115 2.554856

6 -0.048990 -0.133497 2.136440

6 -1.647446 1.685569 1.613947

6 -0.698127 0.092420 4.875490

1 -0.943810 0.177071 5.929857

6 -5.377249 2.710344 -0.007200

1 -4.853340 3.639733 0.162759

6 -1.348417 0.945115 3.943894

6 0.571645 -0.940385 3.064837

1 1.315729 -1.663225 2.754977

6 -2.299503 1.928320 4.321961

1 -2.553559 2.028378 5.373484

6 -2.886244 2.759166 3.387328

1 -3.599380 3.514050 3.702263

6 -3.998023 -0.573340 -2.109053

6 0.241174 -0.815092 4.440750

1 0.744458 -1.462021 5.152649

6 -3.156422 -0.411488 -0.967962

6 -2.515449 0.882835 -1.078333

6 -2.943808 -1.425572 0.124556

1 -3.037257 -0.925291 1.094731

6 -2.559237 2.639278 2.018902

1 -3.002112 3.310534 1.293745

6 -3.034125 1.512506 -2.263340

1 -2.792919 2.507994 -2.600605

6 -6.164800 2.405926 -1.154298

1 -6.320056 3.051422 -2.007423

6 -5.392309 1.570195 0.855287

1 -4.869094 1.475330 1.794418

6 -3.925920 0.607970 -2.899263

1 -4.502793 0.810283 -3.790688

6 1.153275 6.428270 0.846001

6 1.152969 6.262825 -0.518337

6 0.652956 5.073582 -1.112092

6 0.111241 4.032892 -0.278167

6 0.161239 4.232116 1.128343

6 0.661389 5.393473 1.671955

1 1.139140 5.696828 -3.121823

1 1.539275 7.340704 1.288905

1 1.545989 7.038013 -1.169780

6 0.726753 4.895044 -2.516145

6 -0.392423 2.851221 -0.921424

1 -0.167631 3.450214 1.792024

1 0.689845 5.506913 2.751138

6 -0.236341 2.701987 -2.293709

6 0.315785 3.719482 -3.096493

1 -0.550558 1.783695 -2.776697

1 0.401971 3.568906 -4.167661

6 2.317139 0.908624 0.134290

6 2.603235 1.552131 1.353738

6 2.616706 1.580575 -1.064977

6 3.153917 2.831997 1.371763

1 2.410374 1.038490 2.289437

6 3.178488 2.851291 -1.050511

1 2.438860 1.089716 -2.017112

6 3.456236 3.474705 0.171218

1 3.363500 3.318457 2.318803

1 3.403178 3.356487 -1.983481

1 3.902841 4.463473 0.183697

1 -4.633169 -1.423557 -2.306792

6 3.362387 -1.824935 -3.645517

6 2.832030 -1.764408 -2.359945

6 3.552562 -1.164486 -1.321936

6 4.838727 -0.625509 -1.553700

6 5.357252 -0.705993 -2.854165

6 4.628212 -1.287716 -3.889921

6 2.933958 -1.092779 0.028342

6 5.595099 -0.018582 -0.440075

6 5.168078 -0.213569 0.893455

6 3.907426 -0.930526 1.192290

6 5.915676 0.284248 1.966212

1 5.554639 0.093689 2.971023

6 7.073924 1.015457 1.736818

6 7.488315 1.245426 0.421188

6 6.762336 0.732050 -0.649397

1 2.802823 -2.305461 -4.441513

1 1.863431 -2.193777 -2.138643

1 5.059980 -1.337563 -4.884547

1 7.646835 1.411299 2.568903

1 8.384649 1.826530 0.228143

8 3.617405 -1.352008 2.301122

8 1.864600 -1.810834 0.240563

6 -0.910321 -3.254748 1.296166

6 -1.625286 -3.195138 2.499263

6 0.172652 -4.136338 1.169043

6 -1.282946 -4.021649 3.572575

1 -2.429464 -2.478004 2.629766

6 0.533110 -4.969994 2.231269

1 0.760236 -4.146914 0.258912

6 -0.207939 -4.903002 3.417357

1 0.069766 -5.545999 4.248736

6 -2.036576 -3.920809 4.875047

1 -1.916281 -2.921913 5.309490

1 -3.109366 -4.087452 4.731109

1 -1.677059 -4.651864 5.602834

6 1.730799 -5.878625 2.112334

1 2.655169 -5.317574 2.293001

1 1.689178 -6.694405 2.838387

1 1.804718 -6.313459 1.111361

6 -3.916678 -2.607070 0.042957

1 -3.770891 -3.169042 -0.883359

1 -3.775340 -3.294076 0.877737

1 -4.946872 -2.242441 0.063348

6 -0.972082 -2.688505 -1.619906

6 -1.093298 -4.057632 -1.893095

6 -0.685768 -1.794283 -2.659142

6 -0.916711 -4.536197 -3.194329

1 -1.313243 -4.753012 -1.090137

6 -0.508557 -2.248402 -3.970710

1 -0.601794 -0.731154 -2.450103

6 -0.621981 -3.619075 -4.215182

1 -0.480084 -3.987897 -5.228269

6 -0.183720 -1.267519 -5.069724

1 -0.142928 -1.756740 -6.045694

1 -0.935756 -0.472751 -5.121395

1 0.786688 -0.790298 -4.890810

6 -1.042540 -6.006897 -3.504028

1 -0.137145 -6.386474 -3.988910

1 -1.211570 -6.593140 -2.597766

1 -1.877592 -6.194911 -4.187678

6 -6.663385 1.078313 -1.007084

6 -6.190196 0.566108 0.237687

1 -7.261962 0.541191 -1.729446

1 -6.379517 -0.423226 0.629675

1 6.352468 -0.332256 -3.063857

1 7.107148 0.930509 -1.657322

----------------------------------------------------------------------------------------------------------------

**TS(E-GS)**

----------------------------------------------------------------------------------------------------------------

Number of imaginary frequencies = 1

Electronic energy: HF = -3769.475485

Zero-point correction = 1.070867 (Hartree/Particle)

Thermal correction to Energy = 1.136776

Thermal correction to Enthalpy = 1.137720

Thermal correction to Gibbs Free Energy = 0.970529

Sum of electronic and zero-point Energies = -3768.404618

Sum of electronic and thermal Energies = -3768.338709

Sum of electronic and thermal Enthalpies = -3768.337765

Sum of electronic and thermal Free Energies = -3768.504956

......................................................................................................................................................

Cartesian Coordinates

......................................................................................................................................................

45 0.469818 0.208229 0.175151

26 -4.562438 -0.948704 -1.031476

15 -0.992230 -1.334905 -0.684948

15 -1.156706 1.756766 0.769856

6 -0.232354 0.187626 -2.769375

6 0.385328 0.947575 -1.723230

6 0.754665 5.711040 -0.540928

1 1.271756 6.601835 -0.888875

6 -0.919252 -1.018533 -2.469268

6 0.474157 1.853560 -4.431412

1 0.522651 2.191210 -5.462378

6 -0.549339 3.412872 0.330903

6 -4.870082 -1.844060 -2.876747

1 -4.342726 -2.713867 -3.239171

6 -1.651022 1.826028 2.524433

6 -0.182055 0.630050 -4.132197

6 -1.700084 3.032788 3.232114

1 -1.372177 3.953248 2.763664

6 0.971447 2.145825 -2.069101

1 1.394210 2.769828 -1.300762

6 -0.788960 -0.175345 -5.130215

1 -0.740167 0.153461 -6.164579

6 -2.643395 1.884240 5.125796

6 -2.615562 0.666938 4.434774

6 -2.111450 0.651931 3.134523

1 -2.092755 -0.280659 2.590035

6 -1.433814 -1.352460 -4.808262

1 -1.895533 -1.952525 -5.585643

6 -4.546187 -0.166398 0.877140

6 1.027218 2.594087 -3.413993

1 1.519009 3.538213 -3.629249

6 -3.324266 0.132216 0.199118

6 1.220719 5.059571 0.608166

6 -2.702132 -1.131486 -0.131589

6 -0.347446 5.240474 -1.261893

6 -2.187709 3.071204 4.544304

6 -2.792532 1.511229 -0.105065

1 -2.538969 1.562556 -1.169724

6 -3.805567 2.605406 0.256460

1 -4.024985 2.589992 1.326213

1 -4.738231 2.440951 -0.289540

1 -3.433109 3.599416 0.010910

6 -1.515834 -1.771785 -3.462773

1 -2.060792 -2.674625 -3.213506

6 -6.426990 -0.512639 -1.816377

1 -7.269639 -0.194111 -1.218805

6 -3.580956 -2.178947 0.308160

1 -3.400504 -3.236176 0.184716

6 -5.441295 0.338594 -2.399987

1 -5.412333 1.416936 -2.331023

6 -6.075242 -1.861474 -2.116194

1 -6.605692 -2.743624 -1.785943

6 -0.990809 4.081723 -0.816252

1 -1.803900 3.682196 -1.411252

6 -0.809160 5.921370 -2.526049

1 -1.861889 6.215671 -2.459955

1 -0.713364 5.246545 -3.384476

1 -0.222268 6.819010 -2.734428

6 0.557675 3.906140 1.037615

1 0.937041 3.364256 1.896008

6 2.421360 5.569159 1.366088

1 2.976262 6.309503 0.784444

1 3.101350 4.748895 1.616921

1 2.122280 6.043319 2.307768

6 -4.477359 -0.481088 -3.052312

1 -3.591971 -0.136071 -3.563733

6 -4.703224 -1.580734 0.939521

1 -5.557780 -2.105332 1.342973

6 -2.207014 4.367605 5.315956

1 -2.253083 5.230517 4.646116

1 -3.063008 4.415665 5.994775

1 -1.301352 4.472482 5.925064

1 -3.035851 1.908812 6.139775

6 -3.097623 -0.607408 5.083357

1 -3.981714 -0.432459 5.703214

1 -3.353633 -1.361208 4.333030

1 -2.325511 -1.031653 5.737123

6 -0.502796 -4.836846 3.498654

6 -0.101353 -5.565669 2.403282

6 -0.139871 -5.011647 1.095536

6 -0.602826 -3.667025 0.912463

6 -1.042588 -2.959765 2.063736

6 -0.987628 -3.520604 3.322224

1 0.607709 -6.791888 0.121072

1 -0.464112 -5.271313 4.491983

1 0.255319 -6.584742 2.521545

6 0.276626 -5.768624 -0.030609

6 -0.588347 -3.102713 -0.408941

1 -1.460612 -1.971220 1.944788

1 -1.334164 -2.950669 4.178353

6 -0.137558 -3.871360 -1.467093

6 0.272637 -5.210922 -1.284745

1 -0.064368 -3.441270 -2.456049

1 0.603634 -5.784467 -2.144246

1 -5.262203 0.558669 1.232427

6 2.374545 -0.999494 -0.364992

6 2.741757 -0.981103 -1.725061

6 2.466033 -2.223304 0.327988

6 3.152133 -2.142088 -2.370481

1 2.720592 -0.045203 -2.270350

6 2.898813 -3.383762 -0.305389

1 2.220884 -2.270987 1.382793

6 3.245569 -3.342382 -1.655643

1 3.422931 -2.110297 -3.421423

1 2.965802 -4.311516 0.251458

1 3.595770 -4.242214 -2.152442

6 5.657209 -0.678474 0.248195

6 4.924766 -0.934730 1.429875

6 5.287390 -1.982189 2.286262

6 6.344481 -2.820587 1.959217

6 7.040125 -2.610724 0.763578

6 6.705436 -1.551345 -0.075347

1 4.705321 -2.132347 3.188861

1 6.619446 -3.638877 2.616403

1 7.853710 -3.273899 0.486642

6 5.351438 0.528983 -0.540249

6 6.273929 1.072031 -1.443200

6 4.144590 1.230235 -0.309200

6 6.032390 2.291809 -2.074531

6 3.947460 2.486871 -0.885753

6 4.880742 3.017878 -1.772748

1 6.766732 2.692064 -2.766235

1 3.073947 3.050460 -0.594557

1 4.717444 3.996915 -2.211612

6 3.700592 -0.170898 1.732805

6 3.103643 0.676366 0.607377

8 3.120913 -0.266058 2.816707

8 2.067057 1.420771 0.877972

8 0.570691 -0.444501 2.314954

1 7.264526 -1.408889 -0.992789

1 7.214440 0.565141 -1.625282

1 1.475141 -0.176941 2.627564

1 0.477679 -1.391185 2.492729

----------------------------------------------------------------------------------------------------------------

**TS(E-HS)**

----------------------------------------------------------------------------------------------------------------

Number of imaginary frequencies = 1

Electronic energy: HF = -3945.554435

Zero-point correction = 1.096435 (Hartree/Particle)

Thermal correction to Energy = 1.165378

Thermal correction to Enthalpy = 1.166322

Thermal correction to Gibbs Free Energy = 0.993416

Sum of electronic and zero-point Energies = -3944.457324

Sum of electronic and thermal Energies = -3944.388381

Sum of electronic and thermal Enthalpies = -3944.387437

Sum of electronic and thermal Free Energies = -3944.560343

......................................................................................................................................................

Cartesian Coordinates

......................................................................................................................................................

45 0.459569 0.229548 0.094340

26 -4.509941 -1.193807 -1.217582

15 -0.939081 -1.408821 -0.715191

15 -1.266386 1.769070 0.491230

6 -0.140688 0.014175 -2.857665

6 0.421374 0.848373 -1.839173

6 0.571706 5.739943 -0.880367

1 1.074936 6.637106 -1.232622

6 -0.807959 -1.189790 -2.511490

6 0.600611 1.595571 -4.585982

1 0.685033 1.872632 -5.632533

6 -0.690980 3.424199 0.006242

6 -4.707772 -2.276037 -2.976090

1 -4.116568 -3.139589 -3.242169

6 -1.923049 1.922537 2.186480

6 -0.045214 0.378240 -4.240788

6 -2.143752 3.170706 2.783512

1 -1.875921 4.080066 2.259010

6 0.999554 2.035429 -2.228227

1 1.380299 2.707950 -1.479785

6 -0.593807 -0.498478 -5.211698

1 -0.511376 -0.229745 -6.261127

6 -3.057248 2.076875 4.724029

6 -2.859003 0.821081 4.144574

6 -2.297534 0.759668 2.866715

1 -2.154604 -0.205772 2.403189

6 -1.222536 -1.671275 -4.844943

1 -1.638586 -2.327822 -5.602164

6 -4.577755 -0.206594 0.593540

6 1.101867 2.404587 -3.594493

1 1.588848 3.341921 -3.846110

6 -3.342596 0.053711 -0.074942

6 0.926762 5.205648 0.365916

6 -2.674325 -1.217078 -0.245356

6 -0.404093 5.147757 -1.686876

6 -2.709196 3.259197 4.058625

6 -2.821006 1.405238 -0.491248

1 -2.487688 1.351527 -1.533308

6 -3.881228 2.501263 -0.324664

1 -4.171775 2.603836 0.723158

1 -4.770992 2.243203 -0.904736

1 -3.518640 3.471278 -0.662546

6 -1.346439 -2.014394 -3.481241

1 -1.876836 -2.916266 -3.200504

6 -6.376011 -0.958299 -2.081415

1 -7.253729 -0.642190 -1.535268

6 -3.539242 -2.238589 0.276375

1 -3.327790 -3.297144 0.271870

6 -5.431590 -0.101505 -2.721857

1 -5.475262 0.977854 -2.756565

6 -5.929918 -2.302745 -2.243916

1 -6.411066 -3.183669 -1.842562

6 -1.026745 3.980080 -1.232588

1 -1.733697 3.484231 -1.887626

6 -0.760656 5.715343 -3.037984

1 -0.670667 4.949916 -3.816563

1 -0.109377 6.550993 -3.305027

1 -1.794084 6.078765 -3.056635

6 0.286503 4.042518 0.801481

1 0.563387 3.608014 1.754668

6 1.972339 5.868844 1.227355

1 1.514259 6.589117 1.915417

1 2.700532 6.414714 0.621318

1 2.509777 5.133914 1.832862

6 -4.398662 -0.912130 -3.271649

1 -3.523791 -0.557322 -3.794237

6 -4.697849 -1.610000 0.804841

1 -5.551539 -2.114332 1.235086

6 -2.917430 4.601321 4.715160

1 -2.935832 5.408081 3.977893

1 -3.855511 4.629650 5.277013

1 -2.107787 4.818944 5.421650

1 -3.495929 2.138501 5.717205

6 -3.184903 -0.448350 4.888176

1 -3.950320 -0.287017 5.651443

1 -3.538745 -1.228694 4.207132

1 -2.284563 -0.824665 5.388284

6 -0.472250 -4.645839 3.682621

6 -0.020330 -5.423889 2.642322

6 -0.045866 -4.951118 1.302609

6 -0.549237 -3.637223 1.027826

6 -1.054228 -2.885575 2.123281

6 -1.007389 -3.365177 3.415485

1 0.783103 -6.760112 0.456000

1 -0.436988 -5.015669 4.701775

1 0.370577 -6.419727 2.830012

6 0.424479 -5.759049 0.234899

6 -0.504013 -3.146755 -0.322233

1 -1.524459 -1.932278 1.930994

1 -1.389391 -2.755578 4.226850

6 0.000975 -3.960910 -1.320406

6 0.439266 -5.276192 -1.049695

1 0.098160 -3.584621 -2.328817

1 0.811309 -5.888079 -1.864759

1 -5.323893 0.530751 0.847003

6 2.347963 -0.981608 -0.335383

6 2.731860 -1.118806 -1.686048

6 2.467785 -2.112146 0.501229

6 3.194131 -2.332233 -2.179499

1 2.691696 -0.257220 -2.341478

6 2.948874 -3.324533 0.017419

1 2.213845 -2.027350 1.550860

6 3.317852 -3.433411 -1.322170

1 3.483654 -2.417674 -3.222402

1 3.044728 -4.173486 0.684695

1 3.709555 -4.372453 -1.701259

6 5.611394 -0.636469 0.009622

6 4.974324 -0.811826 1.256871

6 5.389529 -1.814857 2.138514

6 6.397906 -2.696676 1.770073

6 6.994844 -2.570165 0.511189

6 6.613767 -1.547390 -0.352839

1 4.885166 -1.897432 3.095341

1 6.711744 -3.484161 2.447455

1 7.769322 -3.266876 0.205862

6 5.271918 0.548705 -0.800057

6 6.148621 1.054776 -1.766594

6 4.087960 1.273102 -0.519749

6 5.892538 2.266700 -2.408290

6 3.886148 2.527032 -1.102677

6 4.777233 3.023432 -2.051192

1 6.592547 2.639380 -3.149326

1 3.046833 3.119000 -0.767645

1 4.610890 4.000059 -2.494269

6 3.798845 0.015951 1.630433

6 3.102064 0.754173 0.473999

8 3.367869 0.073610 2.769664

8 2.059279 1.512598 0.738708

1 1.582444 1.789551 2.380754

8 1.090220 1.732109 3.233215

5 0.694774 0.452794 3.394221

8 0.576342 -0.395241 2.279581

1 0.297599 -1.290798 2.522216

8 0.330691 -0.095252 4.593696

1 0.489324 0.526680 5.313622

1 7.069037 0.526865 -1.988154

1 7.098644 -1.462147 -1.318776

----------------------------------------------------------------------------------------------------------------

**TS(E-IS)**

----------------------------------------------------------------------------------------------------------------

Number of imaginary frequencies = 1

Electronic energy: HF = -3945.5514645

Zero-point correction = 1.096256 (Hartree/Particle)

Thermal correction to Energy = 1.165946

Thermal correction to Enthalpy = 1.166891

Thermal correction to Gibbs Free Energy = 0.990459

Sum of electronic and zero-point Energies = -3944.455208

Sum of electronic and thermal Energies = -3944.385518

Sum of electronic and thermal Enthalpies = -3944.384574

Sum of electronic and thermal Free Energies = -3944.561005

......................................................................................................................................................

Cartesian Coordinates

......................................................................................................................................................

45 0.256740 0.163768 -0.461501

26 -4.889288 -0.277731 0.339408

15 -1.586006 -1.135852 -0.701150

15 -0.664233 1.501965 1.206979

6 -1.608906 0.583065 -2.760912

6 -0.574782 1.203742 -1.986144

6 0.614480 5.912180 0.854485

1 0.946535 6.939122 0.727296

6 -2.181376 -0.651625 -2.342935

6 -1.520495 2.424857 -4.381379

1 -1.872875 2.888272 -5.297947

6 -0.162155 3.252596 1.130112

6 -5.966601 -0.594280 -1.403664

1 -5.832191 -1.431484 -2.071626

6 -0.091242 0.835626 2.800234

6 -2.078020 1.184195 -3.973378

6 -0.949898 0.245903 3.734258

1 -2.019485 0.239682 3.573820

6 -0.065470 2.408693 -2.428290

1 0.710021 2.922644 -1.876599

6 -3.072119 0.504486 -4.725729

1 -3.421972 0.953900 -5.650781

6 0.946710 -0.394589 5.075994

6 1.828540 0.177845 4.150900

6 1.294542 0.794476 3.020064

1 1.966696 1.232671 2.293520

6 -3.590477 -0.703261 -4.304926

1 -4.348956 -1.205690 -4.896355

6 -4.184745 -0.122773 2.264782

6 -0.542124 3.019033 -3.618801

1 -0.110718 3.967197 -3.925743

6 -3.172544 0.246611 1.323285

6 1.131157 5.158066 1.908747

6 -2.923759 -0.907906 0.493394

6 -0.307858 5.375802 -0.052939

6 -0.438735 -0.366423 4.886167

6 -2.526023 1.601864 1.201707

1 -2.711260 1.970364 0.186341

6 -3.079889 2.630037 2.196374

1 -2.857025 2.357538 3.230432

1 -4.165734 2.698691 2.084998

1 -2.653935 3.615631 2.008305

6 -3.155170 -1.282932 -3.092413

1 -3.605168 -2.206669 -2.746123

6 -6.700358 0.718597 0.346136

1 -7.203290 1.043275 1.246302

6 -3.812497 -1.953234 0.918664

1 -3.868692 -2.938671 0.480667

6 -5.733116 1.465493 -0.392147

1 -5.380964 2.459635 -0.153245

6 -6.846230 -0.552983 -0.282144

1 -7.480097 -1.359456 0.059036

6 -0.695887 4.045786 0.100110

1 -1.399404 3.624032 -0.607031

6 -0.846129 6.209630 -1.188067

1 -1.455696 5.608896 -1.868278

1 -0.026970 6.649560 -1.766005

1 -1.463907 7.036037 -0.819500

6 0.734846 3.820969 2.038898

1 1.140726 3.235055 2.852750

6 2.105508 5.756351 2.891449

1 1.585800 6.155199 3.770430

1 2.666683 6.574006 2.433886

1 2.815776 5.001640 3.240607

6 -5.279042 0.655943 -1.472159

1 -4.527714 0.928467 -2.197156

6 -4.576638 -1.469753 2.011243

1 -5.357863 -2.009584 2.527313

6 -1.378470 -0.968636 5.902104

1 -2.235688 -1.444224 5.415880

1 -0.875112 -1.718594 6.517973

1 -1.770667 -0.200135 6.578383

1 1.349467 -0.877754 5.963041

6 3.323925 0.088247 4.326237

1 3.829524 0.932516 3.848590

1 3.606836 0.069732 5.382044

1 3.710079 -0.830008 3.866025

6 0.069184 -4.842717 2.944825

6 -0.017006 -5.550276 1.767977

6 -0.464757 -4.926016 0.573549

6 -0.830275 -3.538212 0.594701

6 -0.721689 -2.841024 1.827397

6 -0.285343 -3.474025 2.969555

1 -0.277219 -6.707188 -0.637532

1 0.407168 -5.330688 3.853647

1 0.250773 -6.602313 1.733292

6 -0.551557 -5.656175 -0.641652

6 -1.261563 -2.929168 -0.635314

1 -0.962867 -1.789401 1.881130

1 -0.199303 -2.905202 3.888458

6 -1.311347 -3.677530 -1.797062

6 -0.970724 -5.048608 -1.800141

1 -1.581207 -3.206415 -2.732962

1 -1.031743 -5.609638 -2.726873

1 -4.621522 0.529373 3.006526

6 1.526172 -0.992570 -1.956406

6 1.754723 -0.341071 -3.187687

6 1.555265 -2.402196 -1.936738

6 1.911052 -1.061254 -4.363154

1 1.801209 0.741568 -3.216381

6 1.733091 -3.131920 -3.110649

1 1.420831 -2.938667 -1.004905

6 1.903856 -2.463114 -4.323900

1 2.058665 -0.542914 -5.305561

1 1.734493 -4.216577 -3.076593

1 2.051564 -3.029484 -5.238624

5 3.526549 3.989865 0.186804

8 2.769315 3.763664 -0.936341

8 3.753901 3.010777 1.138521

1 3.304954 2.194565 0.875218

8 4.081234 5.228187 0.349700

1 4.617421 5.257700 1.149529

1 2.438114 2.851604 -0.916748

6 4.759792 -2.195381 -0.109503

6 3.544511 -2.187833 0.620528

6 3.200034 -3.235398 1.492868

6 4.059560 -4.308973 1.659677

6 5.260930 -4.336889 0.940661

6 5.602353 -3.303409 0.072058

1 2.246994 -3.187417 2.006990

1 3.797606 -5.122422 2.327598

1 5.938718 -5.177274 1.053576

6 5.101209 -1.077752 -1.014530

6 6.346810 -1.010022 -1.657403

6 4.193930 -0.007564 -1.224691

6 6.686676 0.068095 -2.468814

6 4.552232 1.085330 -2.026188

6 5.792491 1.126197 -2.648795

1 7.659202 0.088346 -2.949824

1 3.861761 1.910560 -2.142504

1 6.063460 1.977713 -3.263591

6 2.580926 -1.127470 0.405298

6 2.875402 -0.025168 -0.577732

8 1.464546 -1.105966 0.958608

8 2.221657 1.088134 -0.374978

1 7.076961 -1.796627 -1.514561

1 6.535667 -3.376124 -0.471468

----------------------------------------------------------------------------------------------------------------

**TS(E-JS)**

----------------------------------------------------------------------------------------------------------------

Number of imaginary frequencies = 1

Electronic energy: HF = -3922.1597556

Zero-point correction = 1.108793 (Hartree/Particle)

Thermal correction to Energy = 1.177839

Thermal correction to Enthalpy = 1.178783

Thermal correction to Gibbs Free Energy = 1.005456

Sum of electronic and zero-point Energies = -3921.050962

Sum of electronic and thermal Energies = -3920.981917

Sum of electronic and thermal Enthalpies = -3920.980973

Sum of electronic and thermal Free Energies = -3921.154299

......................................................................................................................................................

Cartesian Coordinates

......................................................................................................................................................

45 0.499565 0.283562 0.106960

26 -4.476706 -1.139998 -1.232305

15 -0.897834 -1.341415 -0.725992

15 -1.230451 1.825647 0.476510

6 -0.067759 0.103163 -2.854990

6 0.507731 0.910150 -1.824152

6 0.629466 5.816418 -0.813516

1 1.136484 6.718543 -1.147104

6 -0.765209 -1.086720 -2.521757

6 0.703692 1.696148 -4.558449

1 0.794652 1.987314 -5.600650

6 -0.646361 3.488861 0.028221

6 -4.671313 -2.248330 -2.976771

1 -4.065496 -3.102521 -3.240308

6 -1.922943 1.933468 2.164999

6 0.035327 0.485478 -4.232491

6 -2.122879 3.156637 2.813522

1 -1.814686 4.081343 2.339852

6 1.101634 2.096426 -2.193561

1 1.479538 2.757938 -1.432339

6 -0.534112 -0.363779 -5.215338

1 -0.445825 -0.083253 -6.261224

6 -3.146848 2.008923 4.666765

6 -2.974547 0.773375 4.030371

6 -2.354273 0.749313 2.780838

1 -2.219844 -0.199954 2.282854

6 -1.192325 -1.524615 -4.862659

1 -1.625236 -2.160965 -5.627719

6 -4.540662 -0.112137 0.551633

6 1.214403 2.483467 -3.554209

1 1.713898 3.417942 -3.792061

6 -3.304722 0.131303 -0.122157

6 0.952584 5.278099 0.439935

6 -2.634731 -1.142159 -0.259719

6 -0.317569 5.220648 -1.650195

6 -2.726184 3.205132 4.076871

6 -2.768956 1.476009 -0.539519

1 -2.415109 1.416000 -1.574293

6 -3.824258 2.579669 -0.395847

1 -4.126548 2.693953 0.647616

1 -4.708751 2.319082 -0.982932

1 -3.454097 3.544472 -0.740048

6 -1.324945 -1.882607 -3.503518

1 -1.875235 -2.775704 -3.235360

6 -6.357408 -0.957943 -2.076329

1 -7.235044 -0.655275 -1.522463

6 -3.498140 -2.149461 0.288798

1 -3.288875 -3.207552 0.308482

6 -5.440471 -0.087615 -2.737940

1 -5.508977 0.990096 -2.784048

6 -5.883140 -2.293885 -2.229189

1 -6.339292 -3.180774 -1.812095

6 -0.947151 4.047861 -1.217996

1 -1.631872 3.551184 -1.895419

6 -0.638647 5.790178 -3.009235

1 -0.528339 5.025446 -3.785733

1 0.019083 6.626381 -3.258014

1 -1.671418 6.153240 -3.053971

6 0.308226 4.108586 0.850386

1 0.564370 3.672910 1.808862

6 1.967107 5.947493 1.333046

1 2.440799 5.226870 2.005056

1 1.494779 6.717478 1.954475

1 2.750172 6.437995 0.748159

6 -4.396194 -0.881345 -3.291278

1 -3.536018 -0.512707 -3.828342

6 -4.658505 -1.509510 0.798700

1 -5.511889 -2.004601 1.240147

6 -2.900087 4.523694 4.788960

1 -2.018657 4.756433 5.398244

1 -3.032435 5.345558 4.079948

1 -3.764662 4.505973 5.457751

1 -3.627671 2.040713 5.641719

6 -3.425256 -0.509648 4.683570

1 -4.409717 -0.397657 5.147398

1 -3.481605 -1.324278 3.956628

1 -2.730220 -0.813312 5.476049

6 -0.839970 -4.868211 3.486228

6 -0.436329 -5.623696 2.410239

6 -0.310426 -5.047190 1.118439

6 -0.618096 -3.658005 0.931342

6 -1.014116 -2.909241 2.068509

6 -1.123858 -3.494993 3.309418

1 0.351061 -6.875224 0.172325

1 -0.934770 -5.319504 4.468541

1 -0.205161 -6.678009 2.530998

6 0.125535 -5.824501 0.014143

6 -0.501114 -3.098944 -0.388122

1 -1.195939 -1.851671 1.967777

1 -1.431804 -2.895233 4.159912

6 -0.035561 -3.890991 -1.422813

6 0.271981 -5.255422 -1.226303

1 0.119586 -3.466507 -2.403996

1 0.624321 -5.844887 -2.066445

1 -5.285962 0.631460 0.788666

6 2.314907 -1.008588 -0.252768

6 2.737715 -1.214267 -1.583416

6 2.349679 -2.107584 0.634331

6 3.168748 -2.463451 -2.008677

1 2.749201 -0.378593 -2.273460

6 2.792792 -3.357941 0.214227

1 2.029359 -1.970197 1.660648

6 3.212739 -3.533111 -1.102822

1 3.491041 -2.605625 -3.035682

1 2.811895 -4.187591 0.912195

1 3.575740 -4.502535 -1.430053

6 5.610423 -0.800595 0.082443

6 4.958489 -0.926260 1.327616

6 5.324704 -1.929795 2.230527

6 6.299110 -2.858043 1.887112

6 6.911169 -2.778507 0.631507

6 6.578082 -1.758272 -0.254457

1 4.809061 -1.975079 3.183618

1 6.574431 -3.645587 2.580885

1 7.659220 -3.511356 0.345619

6 5.323184 0.378780 -0.754672

6 6.216881 0.816003 -1.738790

6 4.173739 1.165038 -0.492547

6 6.011518 2.016502 -2.418867

6 4.023613 2.405973 -1.118403

6 4.930828 2.831629 -2.085316

1 6.724112 2.333714 -3.173568

1 3.211555 3.043779 -0.803070

1 4.803721 3.798307 -2.561685

6 3.822656 -0.039464 1.681677

6 3.173461 0.721491 0.516734

8 3.384621 0.052791 2.816829

8 2.163817 1.536783 0.763443

8 1.151188 1.678619 3.090092

8 0.489886 -0.311077 2.282230

6 0.678502 0.468002 3.234740

6 0.386982 0.068443 4.647053

1 1.618791 1.704447 2.181071

1 -0.142784 -0.882023 4.672043

1 1.339452 -0.022889 5.178116

1 -0.200132 0.849605 5.135041

1 7.072749 -1.712401 -1.217959

1 7.111829 0.241313 -1.947168

----------------------------------------------------------------------------------------------------------------

**X1**

----------------------------------------------------------------------------------------------------------------

Number of imaginary frequencies: 0

Electronic energy: HF = -3461.4562822

Zero-point correction = 0.823453 (Hartree/Particle)

Thermal correction to Energy = 0.877922

Thermal correction to Enthalpy = 0.878867

Thermal correction to Gibbs Free Energy = 0.732500

Sum of electronic and zero-point Energies = -3460.632830

Sum of electronic and thermal Energies = -3460.578360

Sum of electronic and thermal Enthalpies = -3460.577416

Sum of electronic and thermal Free Energies = -3460.723782

......................................................................................................................................................

Cartesian Coordinates

......................................................................................................................................................

45 -0.470134 0.088249 -1.560398

26 2.462060 0.011779 2.869235

15 1.390546 -0.684653 -0.537623

15 -1.587013 0.385017 0.445732

8 -0.374767 2.315774 -2.015806

8 -2.169294 1.127405 -2.490339

6 -0.302858 -2.782164 -0.727970

6 -1.038706 -1.834734 -1.497301

6 -1.538107 2.238781 -2.511718

6 -5.391327 -2.163347 0.093539

1 -6.266834 -2.792168 -0.051742

6 0.923890 -2.398184 -0.111772

6 -1.982785 -4.495055 -1.223599

1 -2.354944 -5.509751 -1.111725

6 -3.139664 -0.567546 0.443054

6 3.699413 -1.641499 3.038389

1 4.134122 -2.166928 2.200174

6 -2.203309 3.468436 -3.072196

1 -2.496848 4.114949 -2.237537

1 -3.087813 3.203262 -3.652469

1 -1.494856 4.021359 -3.693105

6 -2.017523 2.107579 0.865489

6 -0.786995 -4.120001 -0.558787

6 -3.263948 2.466082 1.400076

1 -4.035468 1.714314 1.525347

6 -2.181742 -2.249272 -2.149213

1 -2.740572 -1.540614 -2.751217

6 -0.043709 -5.002746 0.267735

1 -0.410731 -6.015848 0.411752

6 -2.508699 4.741206 1.613843

6 -1.256389 4.405024 1.095073

6 -1.020775 3.077465 0.719088

1 -0.064945 2.806920 0.290212

6 1.127443 -4.598979 0.875034

1 1.684758 -5.291283 1.498943

6 1.124290 1.587600 2.784313

6 -2.649420 -3.578805 -2.009927

1 -3.560867 -3.871674 -2.523352

6 0.677438 0.519833 1.951833

6 -5.322149 -0.928779 -0.563719

6 1.695981 0.282301 0.961779

6 -4.354939 -2.620660 0.910810

6 -3.523621 3.786736 1.771932

6 -0.652192 -0.172638 1.981782

1 -0.487844 -1.243840 1.828831

6 -1.426455 0.059198 3.280996

1 -1.642042 1.120468 3.425003

1 -0.832721 -0.291868 4.130598

1 -2.377686 -0.475265 3.276635

6 1.626038 -3.290193 0.675184

1 2.560684 -2.996533 1.131051

6 3.386875 -0.089408 4.716305

1 3.524829 0.764701 5.364605

6 2.768135 1.201820 1.210954

1 3.686785 1.258719 0.648755

6 2.246486 -0.947091 4.690891

1 1.373318 -0.858776 5.322118

6 4.285419 -0.521298 3.695705

1 5.224531 -0.054060 3.434355

6 -3.230524 -1.807445 1.083006

1 -2.410125 -2.181114 1.685426

6 -4.406922 -3.984567 1.551408

1 -4.065638 -3.953286 2.591168

1 -3.751757 -4.678132 1.012185

1 -5.419396 -4.396689 1.537090

6 -4.183945 -0.139030 -0.388506

1 -4.082741 0.788324 -0.941209

6 -6.450604 -0.455417 -1.446359

1 -7.003872 -1.297500 -1.871811

1 -6.074494 0.158588 -2.269517

1 -7.166004 0.154746 -0.881236

6 2.435191 -1.905601 3.652187

1 1.730134 -2.668887 3.357340

6 2.409038 2.005222 2.328169

1 3.030345 2.760240 2.789407

6 -4.872562 4.185269 2.319796

1 -4.772291 4.812296 3.211815

1 -5.443761 4.761783 1.582459

1 -5.468271 3.308257 2.586614

1 -2.702678 5.771986 1.903064

6 -0.168133 5.434900 0.919522

1 -0.476439 6.414680 1.293767

1 0.742839 5.137291 1.450435

1 0.098572 5.541426 -0.137763

6 4.690496 2.846226 -3.052137

6 5.407904 1.673046 -3.049095

6 4.850529 0.480177 -2.516651

6 3.529514 0.509629 -1.960322

6 2.809012 1.732481 -2.002235

6 3.375410 2.868916 -2.532478

1 6.569024 -0.748010 -2.975093

1 5.123705 3.750937 -3.467943

1 6.411608 1.635514 -3.463634

6 5.572577 -0.741400 -2.541715

6 3.000163 -0.700536 -1.399907

1 1.783986 1.773472 -1.660231

1 2.792713 3.783724 -2.569505

6 3.727221 -1.873816 -1.471367

6 5.017943 -1.896598 -2.046888

1 3.307883 -2.796061 -1.090337

1 5.564016 -2.833707 -2.090230

1 0.597975 1.981130 3.641175

17 0.493020 -0.307774 -3.707618

.
